# Supplementary material for: Test reliability and comparability of paper and Chinese electronic version of the western Ontario and McMaster University osteoarthritis index: protocol for a randomised controlled clinical trial
Source: PubMed Central journal article supplement — BMJ Open. 2022 Nov 8;12(11):e063576. doi: 10.1136/bmjopen-2022-063576 (PMC9644355; doi:10.1136/bmjopen-2022-063576), 2022-11-08
Supplement: bmjopen-2022-063576.draft_revisions.pdf [file bmjopen-2022-063576.draft_revisions.pdf]

# BMJ Open

BMJ Open is committed to open peer review. As part of this commitment we make the peer review history of every article we publish publicly available.

When an article is published we post the peer reviewers' comments and the authors' responses online. We also post the versions of the paper that were used during peer review. These are the versions that the peer review comments apply to.

The versions of the paper that follow are the versions that were submitted during the peer review process. They are not the versions of record or the final published versions. They should not be cited or distributed as the published version of this manuscript.

BMJ Open is an open access journal and the full, final, typeset and author-corrected version of record of the manuscript is available on our site with no access controls, subscription charges or pay-per-view fees (<http://bmjopen.bmj.com>).

If you have any questions on BMJ Open's open peer review process please email [info.bmjopen@bmj.com](mailto:info.bmjopen@bmj.com)

# BMJ Open

**Test reliability and comparability of paper and Chinese electronic version of the Western Ontario and McMaster University osteoarthritis index: protocol for a randomized controlled clinical trial**

|                               |                                                                                                                                                                                                                                                                                              |
|-------------------------------|----------------------------------------------------------------------------------------------------------------------------------------------------------------------------------------------------------------------------------------------------------------------------------------------|
| Journal:                      | <i>BMJ Open</i>                                                                                                                                                                                                                                                                              |
| Manuscript ID                 | bmjopen-2022-063576                                                                                                                                                                                                                                                                          |
| Article Type:                 | Protocol                                                                                                                                                                                                                                                                                     |
| Date Submitted by the Author: | 06-Apr-2022                                                                                                                                                                                                                                                                                  |
| Complete List of Authors:     | Zhang, yujie; Shuguang Hospital<br>Zhao, ye; Shuguang Hospital<br>Liu, kaoqiang; Shuguang Hospital<br>Chai, yongli; Shuguang Hospital<br>Lin, fen; Shanghai Jsre Health Co., Ltd<br>Zhan, Hongsheng; Shuguang Hospital<br>Zheng, Yuxin; Shuguang Hospital<br>Yuan, Weian; Shuguang Hospital, |
| Keywords:                     | Information technology < BIOTECHNOLOGY & BIOINFORMATICS,<br>Musculoskeletal disorders < ORTHOPAEDIC & TRAUMA SURGERY,<br>PRIMARY CARE                                                                                                                                                        |
|                               |                                                                                                                                                                                                                                                                                              |

SCHOLARONE™  
Manuscripts

# Test reliability and comparability of paper and Chinese electronic version of the Western Ontario and McMaster University osteoarthritis index: protocol for a randomized controlled clinical trial

Yujie zhang<sup>1</sup> Ye zhao<sup>1</sup> Kaoqiang liu<sup>1</sup> Yongli chai<sup>1</sup> Fen lin<sup>2</sup> Hong Sheng Zhan<sup>1</sup> Yuxin Zheng<sup>1</sup>  
Wei'an Yuan<sup>1</sup> Yujie zhang, Ye zhao as co-first authors

1. Shuguang Hospital Affiliated to Shanghai University of Traditional Chinese Medicine, Shanghai 201203, China

2. Shanghai Jsure Health Co., Ltd, Shanghai 201215, China

Correspondence should be addressed to Hong Sheng Zhan; 13918449223@139.com, Yuxin Zheng; sg\_zyx1728@126.com, Wei' An Yuan; weian\_1980@163.com

## Abstract

**Introduction:** The WOMAC index is the most commonly used indicator of disease-specific outcome in knee osteoarthritis for its convenience and reliability. It has two formats the paper-based WOMAC (p-WOMAC) and the electronic WOMAC (e-WOMAC). In China, the p-WOMAC has been widely used though e-WOMAC is yet untested. This study aims to test whether e-WOMAC is consistent with the p-WOMAC before and after the intervention.

**Methods and analysis:** A total of 240 patients from Shuguang Hospital Affiliated to Shanghai University of Traditional Chinese Medicine will be randomly assigned in two groups named group A and group B. This study is divided into three stages. In the first stage, patients in group A will be evaluated first by p-WOMAC and then by e-WOMAC. Patients in group B will be evaluated by e-WOMAC and then by p-WOMAC. In the second stage of the study, drug interventions will be implemented. 200mg celecoxib will be administered orally once a day starting from the second day of enrollment for a period of 21 days. In the third stage, post-intervention evaluation will be conducted after administration. Patients in group A will be evaluated first by e-WOMAC and then by p-WOMAC. Patients in group B will be evaluated first by p-WOMAC and then by e-WOMAC. In order to avoid the possible bias because of patients' potential memory, e-WOMAC and p-WOMAC will be taken for each patient at 15 minutes apart. The primary outcome of the study is the mean score difference in WOMAC, and the secondary outcomes are the score differences in WOMAC subscales: pain, stiffness, and physical function.

**Ethics and dissemination:** The protocol has been approved by the Independent Review Board of SGH (approval number: 2020-814-21-01). The results of the trial will be submitted for publication in a peer-reviewed journal.

**Trial registration number:** ChiCTR2100050914

## Strengths and limitations of this study

1  
2  
3  
4 This is the first study to evaluate the impact of Chinese WOMAC index in normal  
5 clinical practice in a Chinese population.  
6

7  
8 It is an effectiveness-implementation hybrid trial that aims to promote more  
9 effective and patient-centred care of people with KOA.  
10

11  
12 Utilizing modern technology, this study seeks to overcome implementation  
13 barriers by gathering and analyzing WOMAC index as related to the general population  
14 to produce a patient-filled report.  
15  
16

17  
18 Based on the results of this study, routine WOMAC data collection can be  
19 integrated into electronic medical records if it is effective.  
20  
21

22  
23 As the instruments will be collected using electronic tablets, a certain level of  
24 computer literacy is required, and the study may not be able to include participants who  
25 are not capable of handling the devices  
26  
27  
28  
29  
30

## 31 **Introduction**

32  
33 Knee osteoarthritis (KOA) is the most common chronic, progressive and  
34 degenerative joint disease in middle and old age. It is characterized by articular cartilage  
35 degeneration, osteosclerosis and hyperplasia. Major clinical manifestations of KOA  
36 include progressive knee joint pain, swelling, stiffness, dysfunction, severe deformation  
37 of joints, and even loss of joint function. KOA can lead to pain and dysfunction of the  
38 lower limb and affect patients' normal life and work. <sup>1</sup> In China, approximately  
39 3% of Chinese people are affected by OA, mostly KOA. There is radiographic evidence  
40 of knee osteoarthritis in up to 60% of middle-aged population. People over 65 years old  
41 even have a 25% higher incidence rate. KOA can greatly affect the patients' health and  
42 quality of life. Today, its incidence tends to increase with the advent of an aging society.  
43 <sup>2-3</sup> With increased demand for health, people are becoming more aware of the need for  
44 early diagnosis, timely intervention, minimal damage and better prognosis. Patient-  
45 reported outcomes (PRO) can truly reflect patients' health status and treatment  
46 outcomes, and have played a significant part in diagnosis and treatment for chronic  
47  
48  
49  
50  
51  
52  
53  
54  
55  
56  
57  
58  
59  
60



1  
2  
3  
4 progressive diseases. The WOMAC is a specific PRO scale, which has high reliability  
5 and sensitivity for KOA severity assessment and can accurately reflect the patients'  
6 symptoms and functional limitations, while having little influence on the subjective  
7 tendency of the patients.<sup>4</sup> For those who have mild symptoms of OA, it shows high  
8 reliability and is currently the most widely used tool to assess severity level of KOA.<sup>5</sup>  
9  
10  
11  
12

13  
14 Although the paper-based WOMAC has already been accepted and widely used,  
15 there are still several shortcomings such as difficulties of collecting and analyzing pen-  
16 and-paper based data. Especially when it comes to the quality of clinical research,  
17 traditional paper-based data is hard to be accessed retrospectively. In times of IT and  
18 communication technologies, smartphone application provides technical basis for  
19 online assessment and telemedicine.<sup>6-8</sup> Nowadays, many different forms of WOMAC  
20 on the mobile phone, tablet or pc are emerged in large numbers, namely electronic  
21 WOMAC (e-WOMAC) which have been favored by researchers and become the first  
22 choice of assessment of KOA in the clinical practice and research.  
23  
24  
25  
26  
27  
28  
29  
30

31 The visual analogue scale (VAS) is used in e-WOMAC for assessment of KOA.  
32 Pain, stiffness and dysfunction assessment can be completed directly at any time at  
33 home through e-WOMAC application and then physicians can rapidly  
34 understand patient's condition and adapt treatment to achieve personalized healthcare  
35 by telemedicine.<sup>9</sup> The main advantages of the e-WOMAC include high efficiency,  
36 lower data collection error rate, shorter response time and increased response rates.<sup>10-</sup>  
37  
38  
39  
40  
41  
42  
43  
44  
45  
46  
47  
48  
49  
50  
51  
52  
53  
54  
55  
56  
57  
58  
59  
60  
13 Practically, online medical service is potentially beneficial for patients with KOA:  
electronic questionnaire can be completed almost anytime and anyplace alleviating the  
influence of environmental factors. The online medical models of care also  
protect the patients' privacy and avoid multiple visits to the clinic. Additionally,  
paper-less records reduce the waste of resources, which is  
beneficial for the environment.

Before being put into use, many countries including the UK, Australia,  
Switzerland and Austria have demonstrated the reliability of the e-WOMAC. R.Theiler  
argues that English e-WOMAC has similar responsiveness in detecting clinically

1  
2  
3  
4 meaningful change than the traditional p-WOMAC. <sup>14</sup> HA Bischoff-Ferrari makes a  
5 similar point in his study of consistency between German e-WOMAC with the original  
6 format as well. <sup>15</sup> Similarly, R.Theiler found that the Swiss computerized WOMAC 3.1  
7 and conventional p-WOMAC are similar in all three subscale. <sup>16</sup> Overall, these studies  
8 illustrate the heterogeneity that electronic data capture (EDC) is a promising alternative  
9 to traditional paper-based mode.  
10  
11  
12  
13  
14

15 In China, the existing body of research on the Chinese paper-based WOMAC  
16 numerical rating scale (NRS) 3.1 suggests its psychological robustness in reliability and  
17 validity. <sup>17</sup> The research also shows that compared with Lysholm score, IKDC  
18 score, HSS score, KSS score and other scale used in assessment of KOA, Chinese  
19 WOMAC 3.1 is the most suitable assessment scale. However, the Chinese electronic  
20 WOMAC hasn't been put into use, so research to date has not yet determined the  
21 equivalence of Chinese e-WOMAC and the traditional p-WOMAC.  
22  
23  
24  
25  
26  
27  
28  
29

## 30 **Objective**

31  
32 By this research, we aim to provide conclusive evidence for developing patient-  
33 centered online health application. We hypothesize that the equivalent between two  
34 formats of the WOMAC will be proved, then our study objectives is to assess: 1.The  
35 comparability of results generated from these two WOMACs. 2.Subjects'  
36 acceptance and satisfaction with the Chinese e-WOMAC index.  
37  
38  
39  
40  
41  
42  
43  
44

## 45 **Method**

### 46 **Study design**

47  
48 This study is a randomised controlled trial (RCT) aims to evaluate the consistency  
49 between the Chinese electronic WOMAC (e-WOMAC) and paper WOMAC (p-  
50 WOMAC) evaluations of patients with knee osteoarthritis (KOA). The study schedule  
51 of enrollment, interventions and assessments are shown in **Table1**.  
52  
53  
54  
55  
56  
57  
58  
59

60 **Table 1** Study schedule of enrolment, interventions and assessments.

| <b>STUDY PERIOD</b>       |                         |                            |                      |
|---------------------------|-------------------------|----------------------------|----------------------|
|                           | <b>Pre-intervention</b> | <b>Intervention period</b> | <b>Close-out</b>     |
| <b>TIMEPOINT</b>          | <b>T<sub>0</sub></b>    | <b>T<sub>1</sub></b>       | <b>T<sub>2</sub></b> |
|                           | Pre-intervention        | Between assessments        | One month follow-up  |
| <b>ENROLMENT:</b>         |                         |                            |                      |
| Eligibility screen        | √                       |                            |                      |
| Informed consent          | √                       |                            |                      |
| Allocation                | √                       |                            |                      |
| <b>INTERVENTION:</b>      |                         |                            |                      |
| Medical treatment         |                         | √                          |                      |
| P-WOMAC analysis          | √                       |                            | √                    |
| E-WOMAC analysis          | √                       |                            | √                    |
| <b>ASSESSMENTS:</b>       |                         |                            |                      |
| Demographics              | √                       |                            |                      |
| <b>Primary outcomes</b>   |                         |                            |                      |
| WOMAC total score         | √                       |                            | √                    |
| <b>Secondary outcomes</b> |                         |                            |                      |
| WOMAC pain score          | √                       |                            | √                    |
| WOMAC stiffness score     | √                       |                            | √                    |
| WOMAC function score      | √                       |                            | √                    |

## Recruitment and Randomization

A total of 240 patients with KOA will be recruited from the Orthopedic Clinic of Shuguang Hospital affiliated to SHUTCM. The KOA patient will receive a clinical examination by an orthopedic surgeon. Patients with KOA meeting the inclusion criteria will be given the detailed information of this study. The importance of patients' active participation in the study and self-monitoring of the disease will be emphasized

1  
2  
3  
4 to improve their enthusiasm. All participants will be provided with an information sheet  
5 and sign the informed consent. After participation acceptance, the patients will be  
6 divided into two groups by randomly generated computer numbers, 120 patients in each  
7 group. Neither the researchers nor the patients will be blinded to the evaluation and  
8 treatment assignment.  
9  
10  
11  
12

13 **Figure.1** provides an overview of the flow of study. The study is divided into  
14 three stages. In the first stage (T0) patients in group A will be evaluated first by p-  
15 WOMAC and then by e-WOMAC. Patients in group B will be evaluated by e-WOMAC  
16 and then by p-WOMAC. In the second stage of the study, drug interventions will be  
17 implemented. 200mg celecoxib will be administered orally once a day starting from the  
18 second day of enrollment for a period of 21 days. The third stage is the consistency  
19 evaluation stage after intervention. The post-intervention evaluation will be conducted  
20 after administration on day 21 (T2). Patients in group A will be evaluated first by e-  
21 WOMAC and then by paper WOMAC. Patients in group B will be evaluated first by  
22 p-WOMAC and then by e-WOMAC. In order to eliminate the possible bias because of  
23 patients' potential memory, e-WOMAC and p-WOMAC evaluation will be taken for  
24 each patient at 15 minutes apart in the first and third stage. This study has been  
25 registered in Chinese Clinical Trial Registry (ChiCTR2100050914) and will be  
26 conducted in strict accordance with Chinese ethical laws and regulations.  
27  
28  
29  
30  
31  
32  
33  
34  
35  
36  
37  
38  
39  
40

## 41 **Blinding**

42  
43 Because of the nature of the study protocol, blinding method will not be used in  
44 this study. The data collection and analysis will be carried out by a single researcher  
45 who is not aware of the study grouping and intervention arrangements.  
46  
47  
48  
49  
50

## 51 **Inclusion and exclusion criteria**

52  
53 Inclusion criteria are as follows: (1) patients who meet the KOA diagnostic criteria  
54 of Osteoarthritis Diagnosis and Treatment Guidelines (2018 edition) issued by the Joint  
55 Surgery Group of the Orthopaedic Society of the Chinese Medical Association; (2)  
56 patients aged 40 to 70 years, including 40 and 70 years, male or female; (3) KL  
57  
58  
59  
60

1  
2  
3  
4 classification  $\leq$  grade 3; (4) patients who have a mobile phone and can use the  
5 application proficiently; (5) patients who understand Chinese language and can  
6 complete the WOMAC independently; (6) patients who have signed the informed  
7 consent.  
8  
9

10  
11 Exclusion criteria are as follows: (1) patients with acute meniscus injury, peripheral  
12 ligament rupture injury, rheumatic arthritis, rheumatoid arthritis, peripheral tumor of  
13 knee joint, tuberculosis, idiopathic osteonecrosis of the knee; (2) patients with serious  
14 cardiovascular, lung, liver, kidney and hematopoietic diseases, hemophilia and other  
15 hemorrhagic diseases, mental illness, pregnancy and lactation; (3) patients who are  
16 allergic or intolerant to trial medication; (4) Patients who had received other treatments  
17 in the last 2 months has an effect on the study; (5) patients who are deemed unsuitable  
18 for the clinical trial.  
19  
20  
21  
22  
23  
24  
25  
26  
27  
28

### 29 **Sample size calculation**

30  
31 There is no previous literature report and the sample size calculation will not be  
32 applicable to this study.  
33  
34

### 35 **Instrument**

36  
37 WOMAC is a widely used self-administered evaluation tool, which can be  
38 completed within 5-10 minutes. Research shows that this scale has objective reliability,  
39 effectiveness and sensitivity for evaluation of the knee joint, and it is an evaluation  
40 scale that has been widely used for patients with OA. The WOMAC rating scale  
41 assesses the structure and function of the hip and knee in terms of pain, stiffness, and  
42 joint function. There are 24 items in all covering the basic symptoms and signs of OA,  
43 5 items for the pain part, 2 items for the stiffness part, and 17 items for the joint function  
44 part, among which each item has a scale bar without scale line, representing the range  
45 of 0-10 points, the starting point on the left side of the scale is 0 point, representing  
46 none, and the end point on the right side is 10 points, representing extreme severity.<sup>18</sup>  
47  
48 The regular paper-based WOMAC requires the patient to fill out based on his or her  
49 symptoms and signs within 48 hours, which is then measured by a physician based on  
50  
51  
52  
53  
54  
55  
56  
57  
58  
59  
60

1  
2  
3  
4 the location. E-WOMAC, a Chinese-language electronic scale for self-assessment of  
5 patients with KOA, used in the study was developed by Shanghai Jsure Health Co. The  
6 text portion of e-WOMAC is identical to WOMAC VAS 3.1. For the first time, the  
7 patient needs to scan the QR code and download the Epdata software. After registration  
8 and login, patients can fill in the electronic version of WOMAC (figure.2), swipe the  
9 ruler on the screen according to their symptoms and signs within 48 hours, and submit  
10 after completing the answers. Doctors can directly receive the score data of patients in  
11 the Epdata database (figure.3).  
12  
13  
14  
15  
16  
17  
18  
19

### 20 **Additional Questions**

21  
22 In the end of the study, a simple questionnaire has been designed to investigate  
23 subjects' perceptions of the study and the propensity for paper-based or electronic  
24 version of WOMAC. The questions will involve the description of the advantages and  
25 disadvantages of two WOMACs.  
26  
27  
28  
29  
30  
31

### 32 **Interventions**

33  
34 Other medications and treatments for KOA, including oral medications, topical  
35 plasters, acupuncture, acupotomy, and arthroscopy will not be available during the  
36 study period. If the patient needs additional treatment, they need to contact the doctor  
37 in advance. To increase the participation of the patients, we make sure all the treatment  
38 of the subjects during the study is free of charge, and the subjects in the trial can have  
39 X-ray and MRI images free of charge and receive appropriate transportation subsidy.  
40 The investigator will make every effort to prevent and treat any harm that may result  
41 from this study. If adverse events occur in the clinical trial, a committee of medical  
42 experts will determine whether it is associated with the treatment. The sponsor will  
43 provide the cost of treatment and the corresponding financial compensation for the  
44 damage related to the trial in accordance with the Provisions of China's "Standard of  
45 Quality Management of Clinical Trials for Drugs".  
46  
47  
48  
49  
50  
51  
52  
53  
54  
55  
56  
57  
58  
59  
60

### **Primary outcomes**

1  
2  
3  
4 The primary outcome of the current study is the mean score difference in  
5 WOMAC. This method has been found to be a semi-quantitative rating scale with better  
6 reliability and validity and more balanced empirical evidence.<sup>18</sup> The Chinese e-  
7 WOMAC which contains 24 different items split up into 3 subscales: pain subscale (5  
8 items), stiffness subscale (2 items) and physical function subscale (17 items) will be  
9 asked to patients. Primary outcomes will be analyzed and reported in two ways. First,  
10 we will compare the difference in the respective score of e-WOMAC and p-WOMAC  
11 before and after the intervention. Then, we will investigate patients' acceptance of two  
12 forms of the WOMAC through a simple self-made questionnaire.  
13  
14  
15  
16  
17  
18  
19  
20  
21  
22

### 23 **Secondary outcome**

24  
25 Additionally, the secondary outcomes include the WOMAC VAS 3.1 Pain Scale  
26 (ranging from 0 (no pain during movement) to 500 (extreme pain during movement)),  
27 the WOMAC Stiffness Scale (ranging from 0 to 200 with higher scores meaning more  
28 severe limitation) and the WOMAC Physical Function Scale (ranging from 0 to 1700,  
29 with higher scores indicating more serious impairment during activities). The  
30 secondary outcome analyses will be assessed similarly to the main endpoint analyses.  
31  
32  
33  
34  
35  
36  
37  
38  
39

### 40 **Data collection and management**

41  
42 We will try to collect resulting data from all patients in the study, including those  
43 who never attend or discontinue therapy, those who discontinue participation in the  
44 study and those who get away. We will gather information at every stage of recruitment,  
45 randomization and treatment so that we can report flow of patients according to the  
46 CONSORT guidelines.  
47  
48  
49

50  
51 The paper questionnaire will be completed by subjects alone and data will be  
52 collected by trained investigators, then reached the database. The electronic  
53 questionnaire will be completed by subjects alone via the smartphone application. The  
54 score of e-WOMAC will be entered into an excel file and then analyzed by SPSS. Note  
55 that time intervals between two assessments should be 15 minutes in order to eliminate  
56  
57  
58  
59  
60

1  
2  
3  
4 the influence of memory and maintain data quality and objectivity.  
5  
6  
7

## 8 **Statistical analysis**

9  
10 The aim of the study is to describe a randomized trial designed to test the  
11 effectiveness and reliability of mobile phone application for assessment of KOA  
12 compared with traditional mode of pen-and-paper based, episodic, onsite evaluation.  
13  
14 As the average scores of the two versions of the outcome measures are the same, there  
15 may also be significant differences in the scores of individual respondents, and/or  
16 differences on certain items. The total score and each dimension of e-WOMAC and p-  
17 WOMAC will be separately analyzed. All data analysis will be performed  
18 by SPSS17.0 statistics software, mean  $\pm$  standard deviation (SD) is used to described  
19 the metrological data following the normal distribution while median (M) and  
20 interquartile range (Q) are used to described the data not following the normal  
21 distribution.  
22  
23  
24  
25  
26  
27  
28  
29  
30

31 First, two conditions will be compared at baseline with a between-group analysis  
32 via a t-test in order to ensure there is no difference between randomization groups.  
33 To test our hypothesis, in the first stage calculate difference scores of each participant  
34 (difference  $d =$  paper WOMAC total score - electronic WOMAC total score) and the  
35 data will be analyzed for normality by the Shapiro-Wilks test. A paired t-test will be  
36 used to calculate the mean score difference if data is normally distributed, and the  
37 results will be reported as 95% confidence intervals between differences in means,  
38 if not, Wilcoxon rank-sum test will be used. Two factor ANOVA model will be used to  
39 account for any differences due to the order of completing the paper and electronic  
40 WOMAC index. In the third stage, the same statistical analysis will be performed after  
41 the intervention the same as the first stage in order to investigate whether the WOMAC  
42 score of both high and low levels of KOA has good consistency.  
43  
44  
45  
46  
47  
48  
49  
50  
51  
52  
53

54 To test the consistency of two versions of the WOMAC, an allowed range is  
55 defined (i.e. a value for the mean difference that needed to be exceeded to determine  
56 that the two WOMACs are not equivalent). As there is great inter-individual variability  
57  
58  
59  
60



1  
2  
3  
4 between different patients, a limit of equivalence will be determined based on the  
5 outcome measure of the pre-experiment to provide a strict test of the equivalence of  
6 two WOMACs. If the mean (and its 95% confidence interval) of the difference falls  
7 within the allowable ranges, then we can gain the credible evidence of equivalence of  
8 scoring system of the WOMAC.  
9  
10  
11  
12

13 Answers to open-ended questions will be subjected to a simple content analysis,  
14 categorized as positive, negative, or neutral comments on the e-WOMAC or p-  
15 WOMAC.  
16  
17  
18

19 For the condition of shedding samples that may occur in the current study, we will  
20 have strict criterion and the statistical analysis will only include patients who participate  
21 in the whole process of the study from enrollment to post-intervention assessment.  
22 Moreover, we need them to record their medication-taking behavior in time so as to  
23 improve their adherence to the study which helps minimize the error.  
24  
25  
26  
27  
28  
29  
30

### 31 **Data monitoring**

32 An external data monitoring committee was not deemed to be necessary for this  
33 trial. Data will be monitored by the research team which includes clinicians,  
34 statisticians and information technology experts. This study is considered to be a low-  
35 risk trial where both the intervention and control groups will receive their usual medical  
36 care. The expected duration of the trial lasts only 1 month and the use of the application  
37 does not present with high risk, there won't be any stopping guidelines to terminate the  
38 trial nor interim analysis planned.  
39  
40  
41  
42  
43  
44  
45  
46  
47  
48

### 49 **Patient and public involvement**

50 This research is planned to be done without patient involvement. The patients will  
51 not be invited to comment on the study design or be consulted on developing patient-  
52 relevant outcomes. The future manuscript will not be edited by patients for readability  
53 or accuracy.  
54  
55  
56  
57  
58  
59

### 60 **Discussion**

1  
2  
3  
4 Since KOA is characterized by chronic progressive degeneration of articular  
5 cartilage, its assessment involves a complex process and requires an overall evaluation  
6 of the patients' condition for a better clinical outcome. However today in China, many  
7 residents don't have the access to family doctors, so they usually need to go to hospital  
8 for treatment. The inconvenience in visiting doctors may cause delay in treatment.  
9 Smartphone application for electronic data capture appears to be an innovative and  
10 promising alternative to the original assessment methods as smartphone application  
11 have already been proved to be accurate tools.  
12

13  
14 However, it would be unwise to consider transforming a traditional paper-based  
15 patient-reported outcomes measure to an electronic version for use in the clinical  
16 practice and research if the equivalence of the two versions hasn't been proved. In this  
17 study protocol, we describe an unblinded trial designed to test a newly developed  
18 technology-based KOA assessment consisting of a mobile phone application for  
19 patients, which is linked to the physicians. Specifically, we want to explore the  
20 reliability and comparability of electronic and paper versions of the WOMAC and  
21 whether EDC can help improve treatment adherence by meeting patients' preferences.  
22

23  
24 To the best of our knowledge, this is the first study to test the reliability of the  
25 Chinese electronic WOMAC for KOA assessment. If our hypothesis is confirmed, the  
26 findings will serve to demonstrate the equivalence of electronic and paper versions of  
27 WOMAC and patients' acceptance of Chinese e-WOMAC so that it can be  
28 implemented in clinical practice and research. Likewise, our results will further  
29 demonstrate the feasibility of e-health for the personalized KOA therapy. (i.e.  
30 timely adjustment of the treatment plan can be rapidly given patients based on self-  
31 reported ePRO with the help of smartphone application)  
32

33  
34 We anticipate that with the support of EDC, physicians will be able to receive  
35 timely feedback on patients' conditions, which will significantly improve the  
36 visiting rate and treatment rate due to the convenience of telemedicine and rapid  
37 response to unwanted events. Note that KOA is a common chronic disease in the elderly,  
38 the study will explore the feasibility of enabling the Chinese e-WOMAC for patients'  
39 long-term use.  
40  
41  
42  
43  
44  
45  
46  
47  
48  
49  
50  
51  
52  
53  
54  
55  
56  
57  
58  
59  
60

1  
2  
3  
4 However, using EDC systems may still have some limitations. The degree  
5 of familiarity with the electronics is not entirely consistent between different  
6 population, especially considering the factors of age, social status and other general  
7 factors. For example, some patients who don't have communication vehicles or cannot  
8 permit proper use of the application may be excluded from online medical service. In  
9 addition, psychological factors may have a relevant influence on filling  
10 out the questionnaire leading to the condition that patients feel non-adapted, have  
11 difficulty in using the smartphone or even failed to complete the questionnaire.<sup>19</sup>  
12 Accordingly, we can make some necessary adjustments of the application. In sum, the  
13 results of the present investigation may help to find new ways of developing  
14 smartphone application and information and communication technology in the medical  
15 field.  
16  
17  
18  
19  
20  
21  
22  
23  
24  
25  
26  
27  
28

### 29 **Data management and oversight**

30 In order to ensure protocol compliance, proper study management, and timely  
31 completion of study procedures, members of the research team from Shuguang Hospital  
32 Affiliated to Shanghai University of Traditional Chinese Medicine will take  
33 responsibility for the conduct of all research staff and study participants.  
34  
35  
36  
37  
38  
39  
40

### 41 **Protocol and registration**

42 The trial is registered with the ChiCTR, ChiCTR2100050914. Registered on 8 Sep 2021,  
43 <https://www.chictr.org.cn/showproj.aspx?proj=133521>  
44  
45  
46  
47  
48

### 49 **Data storage security and patient confidentiality**

50 Patients' medical records will be kept in the respective hospital, and physicians will  
51 document the findings of the study in it, allowing researchers and ethics committees to  
52 access the data. Personal information of patients will not be revealed in  
53 the results of this study, and we will try everything we can to protect patients'  
54 privacy and medical data within the Chinese law. According to medical research ethics,  
55 experimental data especially personal privacy information will not be allowed to be  
56  
57  
58  
59  
60

1  
2  
3  
4 accessed and shared by the public, and will be limited to web-based databases to ensure  
5 that personal privacy information is not disclosed.  
6  
7  
8

### 9 **Ethics and dissemination**

10 The protocol for this trial has been approved by the Independent Review Board of  
11 SGH (approval number: 2020-814-21-01). All participants will be required to sign an  
12 informed consent form before enrollment in this study. The model consent form and  
13 other related documentation given to participants can be provided upon request.  
14  
15  
16

### 17 **Abbreviations**

18 KOA: Knee osteoarthritis; WOMAC: Western Ontario and McMaster Universities  
19 Arthritis Index; e-WOMAC: electronic version of the WOMAC; p-WOMAC: paper-  
20 based WOMAC; e-health: online medical system; PRO: patient-reported outcomes;  
21 EDC : electronic data capture; SGH: Shuguang Hospital Affiliated to Shanghai  
22 University of Traditional Chinese Medicine.  
23  
24  
25  
26  
27

### 28 **Acknowledgements**

29 Acknowledgment is given to Shanghai Jsure Health Co. for its technical support of the  
30 application. The authors would also like to thank staff and students at Shuguang  
31 Hospital Affiliated to Shanghai University of Traditional Chinese Medicine for their  
32 contributions to the implementation of this study.  
33  
34  
35  
36

### 37 **Author information**

#### 38 **Affiliations**

39 **Shuguang Hospital Affiliated to Shanghai University of Traditional Chinese Medicine,**  
40 **Shanghai, China**

41 Wei' an Yuan, Yuxin Zheng, Hong Sheng Zhan, Yujie zhang, Ye zhao, Kaoqiang liu,  
42 Yongli chai

43 **Shanghai Jsure Health Co., Ltd, Shanghai, China**

44 Feng lin  
45  
46  
47  
48  
49  
50  
51

#### 52 **Authors' contributions**

53 YJZ and YZ are the co-first authors. YJZ, YZ, KQL and YLC interpreted data. YJZ  
54 was responsible for writing of report, literature search, and selection of relevant articles.  
55 FL was responsible for the technical service of e-WOMAC.  
56  
57  
58

#### 59 **Funding**

1  
2  
3 This trial was funded by Special project for clinical research of Shanghai Municipal  
4 Health Commission (201940063); 2. Special project for biomedical science and  
5 technology support of Shanghai "science and technology innovation action plan"  
6 (20S21902100); 3. Shanghai Shenkang hospital development center "municipal  
7 hospital hospital enterprise collaborative clinical trial management project"  
8 (20CR4003B); 4. "Xinglin Xinxing" project of Shanghai Municipal Commission of  
9 health and family planning (ZYSNXD011-RC-XLXX-20130049); 5. National Natural  
10 Science Foundation of China (81403414); 6. "Integrated traditional Chinese and  
11 Western Medicine-Chinese patent medicine clinical evaluation platform" (A1-U21-  
12 205-0103). 7. Three year clinical action plan of Shanghai Shenkang Hospital  
13 Development Center (SHDC2020CR1051B); 8. Shanghai chronic musculoskeletal  
14 disease clinical medical research center (20MC1920600).  
15  
16  
17  
18  
19

### 20 **Disclaimer**

21 The funding organisation has not played any role in the design and conduct of the study;  
22 collection, management, analysis, or interpretation of the data; or preparation of the  
23 manuscript.  
24  
25

### 26 **Competing interests**

27 The authors declare that they have no competing interests.  
28  
29

### 30 **Patient consent for publication**

31 Not required  
32

### 33 **Availability of data and material**

34 Data sharing is not available to the public as no datasets were generated during the  
35 current study.  
36  
37  
38

### 39 **Consent for publication**

40 Not applicable.  
41  
42  
43  
44  
45  
46  
47  
48  
49  
50  
51  
52  
53  
54  
55  
56  
57  
58  
59  
60

## References

- 1 Michael JW, Schlüter-Brust KU, Eysel P. The epidemiology, etiology, diagnosis, and treatment of osteoarthritis of the knee. *Dtsch Arztebl Int.* 2010 Mar;107(9):152-62.
- 2 Y. H. Lu and X. B. Shi, "Status and progress of epidemiological research on knee osteoarthritis at home and abroad," *Chinese Journal of Orthopedics and Traumatology of Traditional Chinese Medicine*, vol. 20, no. 6, pp. 81-84, 2012, in Chinese.
- 3 Tang X, Wang S, Zhan S, Niu J, Tao K, Zhang Y, Lin J. The Prevalence of Symptomatic Knee Osteoarthritis in China: Results From the China Health and Retirement Longitudinal Study. *Arthritis Rheumatol.* 2016 Mar;68(3):648-53.
- 4 Pollard B, Johnston M, Dixon D. Exploring differential item functioning in the Western Ontario and McMaster Universities Osteoarthritis Index (WOMAC). *BMC Musculoskelet Disord.* 2012 Dec 29;13:265.
- 5 Ghomrawi HMK, Mancuso CA, Dunning A, Gonzalez Della Valle A, Alexiades M, Cornell C, Sculco T, Bostrom M, Mayman D, Marx RG, Westrich G, O'Dell M, Mushlin AI. Do Surgeon Expectations Predict Clinically Important Improvements in WOMAC Scores After THA and TKA? *Clin Orthop Relat Res.* 2017 Sep;475(9):2150-2158.
- 6 van Netten JJ, Clark D, Lazzarini PA, Janda M, Reed LF. The validity and reliability of remote diabetic foot ulcer assessment using mobile phone images. *Sci Rep.* 2017 Aug 25;7(1):9480.
- 7 Zhang C, Fan L, Chai Z, Yu C, Song J. Smartphone and medical application use among dentists in China. *BMC Med Inform Decis Mak.* 2020 Sep 7;20(1):213.
- 8 Falter M, Budts W, Goetschalckx K, Cornelissen V, Buys R. Accuracy of Apple Watch Measurements for Heart Rate and Energy Expenditure in Patients With Cardiovascular Disease: Cross-Sectional Study. *JMIR Mhealth Uhealth.* 2019 Mar 19;7(3):e11889.
- 9 Anderson JG, Wixson RL, Tsai D, Stulberg SD, Chang RW. Functional outcome and patient satisfaction in total knee patients over the age of 75. *J Arthroplasty.* 1996 Oct;11(7):831-40.
- 10 Bishop FL, Lewis G, Harris S, McKay N, Prentice P, Thiel H, Lewith GT. A within-subjects trial to test the equivalence of online and paper outcome measures: the Roland Morris disability questionnaire. *BMC Musculoskelet Disord.* 2010 Jun 8;11:113.
- 11 Raat H, Mangunkusumo RT, Mohangoo AD, Juniper EF, Van Der Lei J. Internet and written respiratory questionnaires yield equivalent results for adolescents. *Pediatr Pulmonol.* 2007 Apr;42(4):357-61.
- 12 Leece P, Bhandari M, Sprague S, Swiontkowski MF, Schemitsch EH, Tornetta P, Devereaux PJ, Guyatt GH. Internet versus mailed questionnaires: a randomized comparison (2). *J Med Internet Res.* 2004 Sep 24;6(3):e30. 2004 Oct 29;6(4):e38. Corrected and republished in: *J Med Internet Res.* 2004 Oct 29;6(4):e39.
- 13 Bälter KA, Bälter O, Fondell E, Lagerros YT. Web-based and mailed questionnaires: a comparison of response rates and compliance. *Epidemiology.* 2005 Jul;16(4):577-9.
- 14 Theiler R, Bischoff-Ferrari HA, Good M, Bellamy N. Responsiveness of the electronic touch screen WOMAC 3.1 OA Index in a short term clinical trial with rofecoxib. *Osteoarthritis Cartilage.* 2004 Nov;12(11):912-6.
- 15 Bischoff-Ferrari HA, Vondechend M, Bellamy N, Theiler R. Validation and patient acceptance of a computer touch screen version of the WOMAC 3.1 osteoarthritis index. *Ann Rheum Dis.* 2005 Jan;64(1):80-4.
- 16 Theiler R, Spielberger J, Bischoff HA, Bellamy N, Huber J, Kroesen S. Clinical evaluation of

1  
2  
3 the WOMAC 3.0 OA Index in numeric rating scale format using a computerized touch screen  
4 version. *Osteoarthritis Cartilage*. 2002 Jun;10(6):479-81.

5  
6 17 Symonds T, Hughes B, Liao S, Ang Q, Bellamy N. Validation of the Chinese Western Ontario  
7 and McMaster Universities Osteoarthritis Index in Patients From Mainland China With  
8 Osteoarthritis of the Knee. *Arthritis Care Res (Hoboken)*. 2015 Nov;67(11):1553-60.

9  
10 18 Kwon SB, Ku Y, Han HU, Lee MC, Kim HC, Ro DH. A machine learning-based diagnostic  
11 model associated with knee osteoarthritis severity. *Sci Rep*. 2020 Sep 25;10(1):15743.

12  
13 19 Benhamou M, Baron G, Dalichampt M, Boutron I, Alami S, Rannou F, Ravaud P, Poiraudreau  
14 S. Development and validation of a questionnaire assessing fears and beliefs of patients with knee  
15 osteoarthritis: the Knee Osteoarthritis Fears and Beliefs Questionnaire (KOFBeQ). *PLoS One*.  
16 2013;8(1):e53886.  
17  
18  
19  
20

## 21 **Figure Legend**

### 22 **Figure1: Flow chart of the study**

### 23 **Figure2: Examples of the web for the subjects**

24 (a) the Chinese e-WOMAC app interface after login;

25  
26 (b) location of knee osteoarthritis: The picture shows the assessed joint (‘您不舒服  
27 的地方’ means where do you feel uncomfortable? ‘左膝’ means left knee; ‘右膝’  
28 means right knee ; ‘双膝’ means both sides of knee);

29  
30 (c) e-WOMAC assessment of pain intensity: The picture shows a question about the  
31 level of the pain up and down the stairs in the WOMAC pain subscale.(‘上楼梯或下  
32 楼梯’ means go upstairs and downstairs. Then choose pain level according to your  
33 feelings, the right end of the scale bar means extreme pain and the left means no pain.)

34  
35  
36 **Figure3: Examples of the web for the physician** (a)details and operation of subjects’  
37 data; (b)the score of each question; (c)total score as well as pain, stiffness and physical  
38 function subscale scores of e-WOMAC.  
39  
40  
41  
42  
43  
44  
45  
46  
47  
48  
49  
50  
51  
52  
53  
54  
55  
56  
57  
58  
59  
60

1  
2  
3  
4  
5  
6  
7  
8  
9  
10  
11  
12  
13  
14  
15  
16  
17  
18  
19  
20  
21  
22  
23  
24  
25  
26  
27  
28  
29  
30  
31  
32  
33  
34  
35  
36  
37  
38  
39  
40  
41  
42  
43  
44  
45  
46

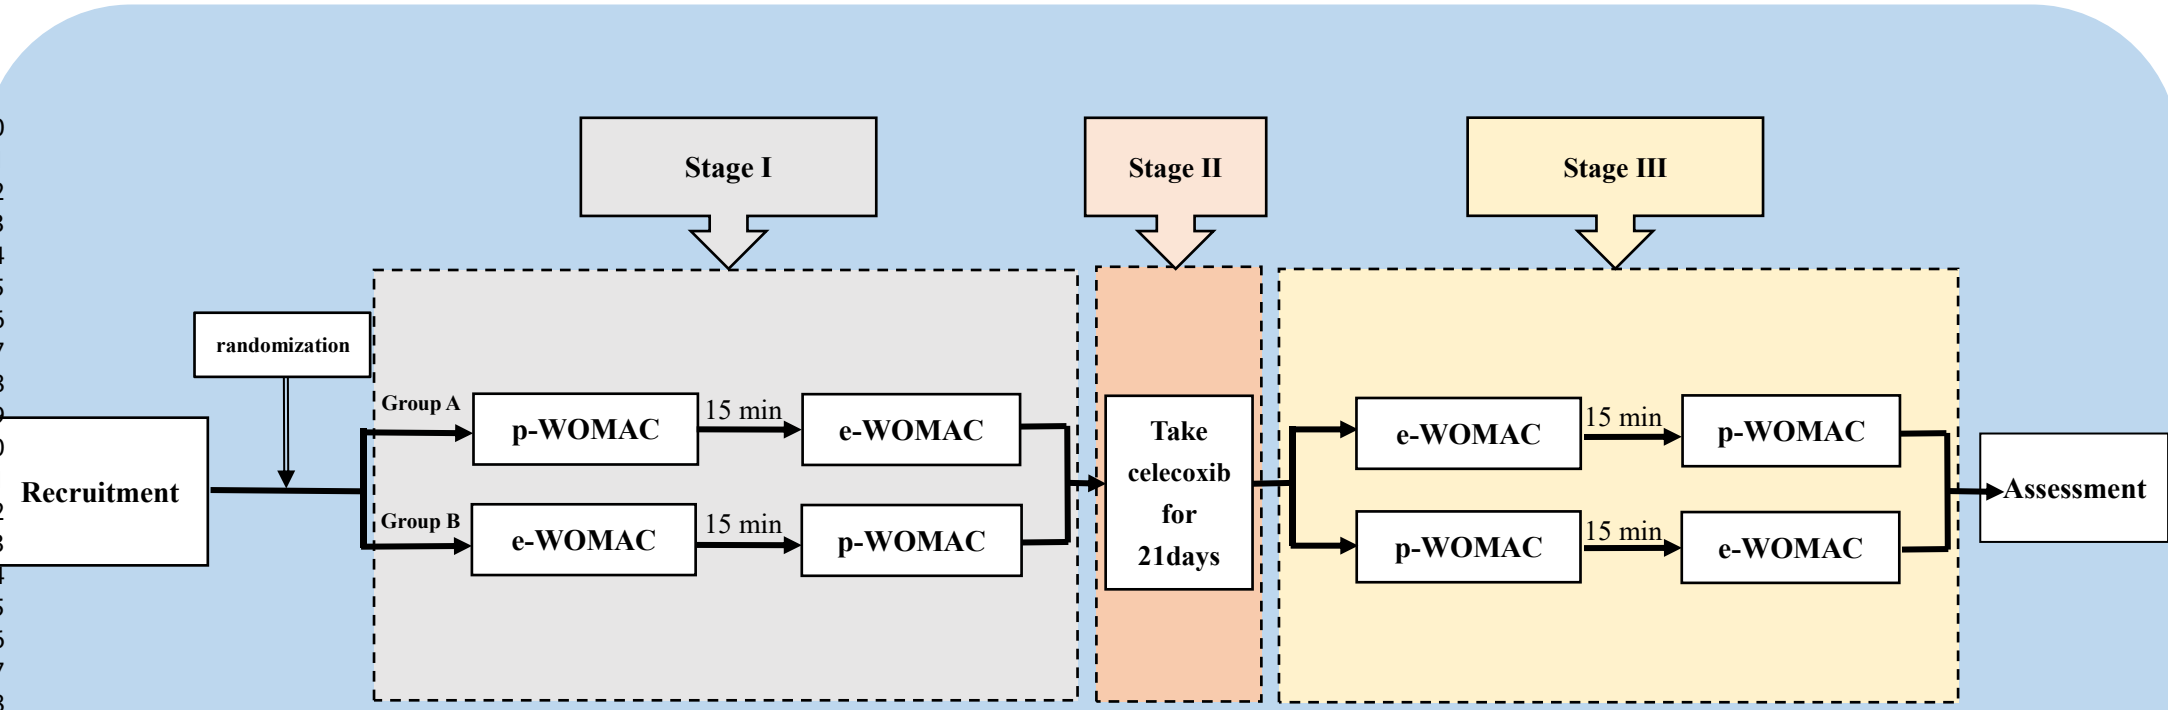

**Fig. 1** Flow chart of the study



ePData

点击按钮进入应用

开始

您的医生已经选择了您的研究关节，如果您确定不了哪一处才是您的研究关节，请在填写本调查表以前询问清楚。

您不舒服的地方？

左膝  右膝  双膝

返回

下一步

请根据您在过去48小时内感觉到的膝关节【疼痛程度】将下方的三角滑块滑到合适的位置。

(2) 上楼梯或下楼梯

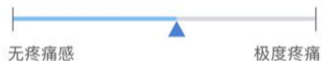

上一步

下一步

(a)

(b)

(c)

- 1 首页
- 2 报表
- 3 受试者数据
- 4 管理
- 5 注册
- 6 注册
- 7
- 8
- 9
- 10
- 11
- 12
- 13
- 14
- 15
- 16
- 17
- 18
- 19
- 20
- 21
- 22
- 23
- 24
- 25
- 26
- 27
- 28
- 29

数据列表 (中心编号:01)

数据列表 受试者列表

日志填写完成开始时间 日志填写完成结束时间 全部状态 全部受试者编号 全部数据

搜索

| 受试者编号  | 日志填写完成时间                        | 日志名称 | 上传时间                            | 最近修改时间                          | 阶段  | 状态 | 操作 |
|--------|---------------------------------|------|---------------------------------|---------------------------------|-----|----|----|
| S01004 | 2021-09-26 17:08:52 (UTC+08:00) | 问卷评估 | 2021-09-26 17:08:52 (UTC+08:00) | 2021-09-26 17:08:52 (UTC+08:00) | 治疗期 | 有效 | 操作 |
| S01004 | 2021-07-21 19:50:58 (UTC+08:00) | 问卷评估 | 2021-07-21 19:50:58 (UTC+08:00) | 2021-07-21 19:50:58 (UTC+08:00) | 治疗期 | 有效 | 操作 |
| S01004 | 2021-07-21 19:48:50 (UTC+08:00) | 问卷评估 | 2021-07-21 19:48:50 (UTC+08:00) | 2021-07-21 19:48:50 (UTC+08:00) | 治疗期 | 有效 | 操作 |
| S01004 | 2021-07-21 19:47:33 (UTC+08:00) | 问卷评估 | 2021-07-21 19:47:33 (UTC+08:00) | 2021-07-21 19:47:33 (UTC+08:00) | 治疗期 | 有效 | 操作 |
| S01004 | 2021-07-21 19:47:04 (UTC+08:00) | 问卷评估 | 2021-07-21 19:47:04 (UTC+08:00) | 2021-07-21 19:47:04 (UTC+08:00) | 治疗期 | 有效 | 操作 |
| S01004 | 2021-07-21 19:46:33 (UTC+08:00) | 问卷评估 | 2021-07-21 19:46:33 (UTC+08:00) | 2021-07-21 19:46:33 (UTC+08:00) | 治疗期 | 有效 | 操作 |
| S01004 | 2021-07-21 19:45:45 (UTC+08:00) | 问卷评估 | 2021-07-21 19:45:45 (UTC+08:00) | 2021-07-21 19:45:45 (UTC+08:00) | 治疗期 | 有效 | 操作 |

(a)

日志详情

|                               |                                 |
|-------------------------------|---------------------------------|
| 受试者编号:                        | S01004                          |
| 日志名称:                         | 问卷评估                            |
| 日志填写完成时间:                     | 2021-06-10 20:23:15 (UTC+08:00) |
| 日志上传时间:                       | 2021-06-10 20:23:15 (UTC+08:00) |
| 最近修改时间:                       | 2021-06-10 20:23:15 (UTC+08:00) |
| 阶段:                           | 治疗期                             |
| 状态:                           | 有效                              |
| 您不舒服的地方?                      |                                 |
| 左膝:                           |                                 |
| 疼痛程度: (1) 在平坦的路上行走            |                                 |
| 63;                           |                                 |
| 疼痛程度: (2) 上楼梯或下楼梯             |                                 |
| 65;                           |                                 |
| 疼痛程度: (3) 晚上,在床上时,就是说打扰您睡觉的疼痛 |                                 |
| 60;                           |                                 |
| 疼痛程度: (4) 弯腰时                 |                                 |
| 71;                           |                                 |

(b)

|    |                                |
|----|--------------------------------|
| 23 | 行动障碍的程度: (23) 做繁重的家务活问题<br>54; |
| 24 | 行动障碍的程度: (24) 做轻松的家务活<br>48;   |
| 25 | 疼痛评分<br>294;                   |
| 26 | 僵硬评分<br>140;                   |
| 27 | 功能评分<br>1027;                  |
| 28 | womac总评分<br>1461;              |

(c)

# BMJ Open

## Test reliability and comparability of paper and Chinese electronic version of the Western Ontario and McMaster University osteoarthritis index: protocol for a randomized controlled clinical trial

|                                 |                                                                                                                                                                                                                                                                                               |
|---------------------------------|-----------------------------------------------------------------------------------------------------------------------------------------------------------------------------------------------------------------------------------------------------------------------------------------------|
| Journal:                        | <i>BMJ Open</i>                                                                                                                                                                                                                                                                               |
| Manuscript ID                   | bmjopen-2022-063576.R1                                                                                                                                                                                                                                                                        |
| Article Type:                   | Protocol                                                                                                                                                                                                                                                                                      |
| Date Submitted by the Author:   | 14-Jul-2022                                                                                                                                                                                                                                                                                   |
| Complete List of Authors:       | Zhang, yujie; Shuguang Hospital<br>Zhao, ye; Shuguang Hospital<br>Liu, kaoqiang; Shuguang Hospital<br>Chai, yongli; Shuguang Hospital<br>Lin, fen; Shanghai Jsure Health Co., Ltd<br>Zhan, Hongsheng; Shuguang Hospital<br>Zheng, Yuxin; Shuguang Hospital<br>Yuan, Weian; Shuguang Hospital, |
| <b>Primary Subject Heading</b>: | Diagnostics                                                                                                                                                                                                                                                                                   |
| Secondary Subject Heading:      | Health services research, Research methods                                                                                                                                                                                                                                                    |
| Keywords:                       | Information technology < BIOTECHNOLOGY & BIOINFORMATICS, Musculoskeletal disorders < ORTHOPAEDIC & TRAUMA SURGERY, PRIMARY CARE                                                                                                                                                               |
|                                 |                                                                                                                                                                                                                                                                                               |

SCHOLARONE™  
Manuscripts

# Test reliability and comparability of paper and Chinese electronic version of the Western Ontario and McMaster University osteoarthritis index: protocol for a randomized controlled clinical trial

Yujie zhang<sup>1</sup> Ye zhao<sup>1</sup> Kaoqiang liu<sup>1</sup> Yongli chai<sup>1</sup> Fen lin<sup>2</sup> Hong Sheng Zhan<sup>1</sup> Yuxin Zheng<sup>1</sup> Wei'an Yuan<sup>1</sup> Yujie zhang, Ye zhao as co-first authors

1. Shuguang Hospital Affiliated to Shanghai University of Traditional Chinese Medicine, Shanghai 201203, China

2. Shanghai Jsure Health Co., Ltd, Shanghai 201215, China

Correspondence should be addressed to Hong Sheng Zhan; 13918449223@139.com, Yuxin Zheng; sg\_zyx1728@126.com, Wei'an Yuan; weian\_1980@163.com

## Abstract

**Introduction:** The Western Ontario and McMaster University osteoarthritis index (WOMAC) is the most commonly used indicator of disease-specific outcome in knee osteoarthritis for its convenience and reliability. It has two formats the paper-based WOMAC (p-WOMAC) and the electronic WOMAC (e-WOMAC). In China, the p-WOMAC has been widely used though e-WOMAC is yet untested. This study aims to test whether e-WOMAC is consistent with the p-WOMAC before and after the intervention.

**Methods and analysis:** A total of 70 patients from Shuguang Hospital Affiliated to Shanghai University of Traditional Chinese Medicine will be randomly assigned in two groups named group A and group B. This study is divided into three stages. In the first stage, patients in group A will be evaluated first by p-WOMAC and then by e-WOMAC. Patients in group B will be evaluated by e-WOMAC and then by p-WOMAC. In the second stage of the study, drug interventions will be implemented. 200mg celecoxib will be administered orally once a day starting from the second day of enrollment for a period of 21 days. In the third stage, post-intervention evaluation will be conducted after administration. Patients in group A will be evaluated first by e-WOMAC and then by p-WOMAC. Patients in group B will be evaluated first by p-WOMAC and then by e-WOMAC. In order to avoid the possible bias because of patients' potential memory, e-WOMAC and p-WOMAC will be taken for each patient at 15 minutes apart. The primary outcome of the study is the mean score difference in WOMAC, and the secondary outcomes are the score differences in WOMAC subscales: pain, stiffness, and physical function.

**Ethics and dissemination:** The protocol has been approved by the Independent Review Board of SGH (approval number: 2020-814-21-01). The results of the trial will be submitted for publication in a peer-reviewed journal.

**Trial registration number:** ChiCTR2100050914

**Protocol version:** 1.0, 20 November 2021

## Strengths and limitations of this study

1  
2  
3  
4 This is the first study to evaluate the reliability and comparability of paper-based  
5 and Chinese electronic version of WOMAC index in normal clinical practice in a  
6 Chinese population.  
7  
8

9  
10 Moreover, this trial focuses on subjects' propensity for paper-based or Chinese  
11 electronic version of WOMAC.  
12

13  
14 This study is a randomized, crossover design with intervention which can verify  
15 whether e-WOMAC is the same as p-WOMAC in sensitively reflecting the actual  
16 changes of patients' conditions.  
17  
18

19  
20 As the instruments will be collected using electronic tablets, a certain level of  
21 computer literacy is required, and the study may not be able to include participants who  
22 are not capable of handling the devices.  
23  
24

25  
26 Since the patients with KL classification  $\leq$  grade 3 KOA were included in the  
27 study, the results will not be valid for severe KOA patients.  
28  
29

## 30 31 32 33 **Introduction**

34  
35 Knee osteoarthritis (KOA) is the most common chronic, progressive and  
36 degenerative joint disease in middle and old age. It is characterized by articular cartilage  
37 degeneration, osteosclerosis and hyperplasia.<sup>1</sup> Major clinical manifestations of KOA  
38 include progressive knee joint pain, swelling, stiffness, dysfunction, severe deformation  
39 of joints, and even loss of joint function. KOA can lead to pain and dysfunction of the  
40 lower limb and affect patients' normal life and work.<sup>2</sup>  
41  
42  
43  
44  
45  
46

47  
48 The worldwide prevalence of KOA is increasing, reported to be between 3.8% in  
49 2010, and with an estimated 25,000 people suffer from KOA in 2018.<sup>3 4</sup> There is  
50 radiographic evidence of knee osteoarthritis in up to 14% in asymptomatic uninjured  
51 adults aged <40 years and 43% of middle-aged population.<sup>5</sup> In China, approximately  
52 8.1% of Chinese people are affected by KOA.<sup>6</sup> KOA can greatly affect the patients'  
53 health and quality of life. Today, its incidence tends to increase with the advent of an  
54 aging society.<sup>7</sup> With increased focus on health, people are becoming more aware of  
55  
56  
57  
58  
59  
60

1  
2  
3  
4 the need for early diagnosis, timely intervention, minimal damage and better prognosis.  
5 Patient-reported outcomes (PRO) can truly reflect patients' health status and treatment  
6 outcomes, and have played a significant part in diagnosis and treatment for chronic  
7 progressive diseases. The WOMAC is a specific PRO scale, which has high reliability  
8 and sensitivity for KOA severity assessment and can accurately reflect the patients'  
9 symptoms and functional limitations, and it is also less affected by subjective factors  
10 of the patients.<sup>8</sup> For those who have mild symptoms of OA, it shows high reliability  
11 and is currently the most widely used tool to assess severity level of KOA.<sup>9</sup>

12  
13  
14  
15  
16  
17  
18  
19  
20 Although the paper-based WOMAC has already been accepted and widely used,  
21 there are still several shortcomings such as difficulties of collecting and analyzing pen-  
22 and-paper based data. Especially when it comes to the quality of clinical research,  
23 traditional paper-based data is hard to be accessed retrospectively. In times of  
24 Information Technology and communication technologies, smartphone application  
25 provides technical basis for online assessment and telemedicine.<sup>10 11 12</sup> Meanwhile, a  
26 new mode of administration that patient-reported outcomes collected and recorded  
27 using electronic data capture(EDC) tool came into being and received increasing  
28 attention in recent years. Nowadays, many different forms of WOMAC on the mobile  
29 phone, tablet or pc appears in large numbers, namely electronic WOMAC (e-WOMAC)  
30 which have been favored by researchers and become a very useful tool for objective  
31 assessment of KOA in the clinical practice and research gradually.<sup>13 14</sup>

32  
33  
34  
35  
36  
37  
38  
39  
40  
41  
42  
43 The visual analogue scale (VAS) is used in e-WOMAC for assessment of KOA.  
44 Pain, stiffness and dysfunction assessment can be completed directly at any time at  
45 home through e-WOMAC application and then physicians can rapidly  
46 understand patient's condition and adapt treatment to achieve personalized healthcare  
47 by telemedicine.<sup>15</sup> The main advantages of the e-WOMAC include high efficiency,  
48 lower data collection error rate, faster response and increased response rates.<sup>16 17 18 19</sup>  
49 Practically, online medical service is potentially beneficial for patients with KOA:  
50 electronic questionnaire can be completed almost anytime and anyplace alleviating the  
51 influence of environmental factors. The online medical models of care also avoid  
52  
53  
54  
55  
56  
57  
58  
59  
60

multiple visits to the clinic. Additionally, paper-less records reduce the waste of resources, which is beneficial for the environment.

Before being put into use, many countries including the UK, Australia, Switzerland and Austria have demonstrated the reliability of the e-WOMAC. R.Theiler argues that English e-WOMAC has similar responsiveness in detecting clinically meaningful change than the traditional p-WOMAC.<sup>20</sup> HA Bischoff-Ferrari makes a similar point in his study of consistency between German e-WOMAC with the original format as well.<sup>21</sup> Similarly, R.Theiler found that the Swiss computerized WOMAC 3.1 and conventional p-WOMAC are similar in all three subscale.<sup>22</sup> Overall, these studies illustrate the heterogeneity that the new mode of administration is a promising alternative to traditional mode.

In China, the existing body of research on the Chinese paper-based WOMAC numerical rating scale (NRS) 3.1 suggests its psychological robustness in reliability and validity.<sup>23</sup> The research also shows that compared with Lysholm score, IKDC score, HSS score, KSS score and other scale used in assessment of KOA, Chinese WOMAC 3.1 is the most suitable assessment scale. However, the Chinese electronic WOMAC hasn't been put into use, so research to date has not yet determined the equivalence of Chinese e-WOMAC and the traditional p-WOMAC.

## Objective

By this research, we aim to evaluate the new mode of administration and provide conclusive evidence for developing patient-centered online health application. We hypothesize that the equivalent between two formats of the WOMAC will be proved, then our study objectives is to assess: 1. The comparability of results generated from these two WOMACs. 2. Subjects' acceptance and satisfaction with the Chinese e-WOMAC index.

## Method

### Study design

This study is a randomized controlled trial (RCT) aims to evaluate the consistency

between the Chinese electronic WOMAC (e-WOMAC) and paper WOMAC (p-WOMAC) evaluations of patients with knee osteoarthritis (KOA). The study schedule of enrollment, interventions and assessments are shown in **Table 1**. The start and end of the study was planned for September 2021 and December 2023, respectively.

**Table 1** Study schedule of enrolment, interventions and assessments.

| <b>STUDY PERIOD</b>       |                         |                            |                      |
|---------------------------|-------------------------|----------------------------|----------------------|
|                           | <b>Pre-intervention</b> | <b>Intervention period</b> | <b>Close-out</b>     |
| <b>TIMEPOINT</b>          | <b>T<sub>0</sub></b>    | <b>T<sub>1</sub></b>       | <b>T<sub>2</sub></b> |
|                           | Pre-intervention        | Between assessments        | One month follow-up  |
| <b>ENROLMENT:</b>         |                         |                            |                      |
| Eligibility screen        | √                       |                            |                      |
| Informed consent          | √                       |                            |                      |
| Allocation                | √                       |                            |                      |
| <b>INTERVENTION:</b>      |                         |                            |                      |
| Medical treatment         |                         | √                          |                      |
| P-WOMAC analysis          | √                       |                            | √                    |
| E-WOMAC analysis          | √                       |                            | √                    |
| <b>ASSESSMENTS:</b>       |                         |                            |                      |
| Demographics              | √                       |                            |                      |
| <b>Primary outcomes</b>   |                         |                            |                      |
| WOMAC total score         | √                       |                            | √                    |
| <b>Secondary outcomes</b> |                         |                            |                      |
| WOMAC pain score          | √                       |                            | √                    |
| WOMAC stiffness score     | √                       |                            | √                    |
| WOMAC function score      | √                       |                            | √                    |



## Recruitment and Randomization

A total of 70 patients with KOA will be recruited from the Orthopedic Clinic of Shuguang Hospital affiliated to SHUTCM. The KOA patient will receive a clinical examination by an orthopedic surgeon. Patients with KOA meeting the inclusion criteria will be given the detailed information of this study. The importance of patients' active participation in the study and self-monitoring of the disease will be emphasized to improve their enthusiasm. All participants will be provided with an information sheet and sign the informed consent by research nurse. After participation acceptance, the patients will be divided into group A and group B by randomly generated computer numbers, 35 patients in each group. Researcher not involved in patient care will prepare and administer the randomization schedule. Neither the researchers nor the patients will be blinded to the evaluation and treatment assignment.

**Figure.1** provides an overview of the flow of study. The study is divided into three stages. In the first stage (T0) patients in group A will be evaluated first by p-WOMAC and then by e-WOMAC. Patients in group B will be evaluated by e-WOMAC and then by p-WOMAC. In the second stage of the study, drug interventions will be implemented. 200mg celecoxib will be administered orally once a day starting from the second day of enrollment for a period of 21 days. The third stage is the consistency evaluation stage after intervention. The post-intervention evaluation will be conducted after administration on day 21 (T2). Patients in group A will be evaluated first by e-WOMAC and then by paper WOMAC. Patients in group B will be evaluated first by p-WOMAC and then by e-WOMAC. In order to eliminate the possible bias because of patients' potential memory, e-WOMAC and p-WOMAC evaluation will be taken for each patient at 15 minutes apart in the first and third stage. This study has been registered in Chinese Clinical Trial Registry (ChiCTR2100050914) and will be conducted in strict accordance with Chinese ethical laws and regulations.

## Blinding

Because of the nature of the study protocol, blinding method will not be used in this study. The data collection and analysis will be carried out by a single researcher

1  
2  
3  
4 who is not aware of the study grouping and intervention arrangements.  
5  
6  
7

## 8 **Inclusion and exclusion criteria**

9  
10 Inclusion criteria are as follows: (1) patients who meet the KOA diagnostic criteria  
11 of Osteoarthritis Diagnosis and Treatment Guidelines (2018 edition) issued by the Joint  
12 Surgery Group of the Orthopaedic Society of the Chinese Medical Association; (2)  
13 patients aged 40 to 70 years, including 40 and 70 years, male or female; (3) KL  
14 classification  $\leq$  grade 3; (4) patients who have a mobile phone and can use the  
15 application proficiently; (5) patients who understand Chinese language and can  
16 complete the WOMAC independently; (6) patients who have signed the informed  
17 consent.  
18  
19  
20  
21  
22  
23  
24

25 Exclusion criteria are as follows: (1) patients with acute meniscus injury, peripheral  
26 ligament rupture injury, rheumatic arthritis, rheumatoid arthritis, peripheral tumor of  
27 knee joint, tuberculosis, idiopathic osteonecrosis of the knee; (2) patients with serious  
28 cardiovascular, lung, liver, kidney and hematopoietic diseases, hemophilia and other  
29 hemorrhagic diseases, mental illness, pregnancy and lactation; (3) patients who are  
30 allergic or intolerant to trial medication; (4) Patients who had received other treatments  
31 in the last 2 months has an effect on the study; (5) patients who are deemed unsuitable  
32 for the clinical trial.  
33  
34  
35  
36  
37  
38  
39  
40  
41  
42  
43

## 44 **Sample size calculation**

45  
46 The sample size is calculated with based on a small sample pre-test we carried  
47 out in the early stage and the sample size calculation method studied by Bellamy et  
48 al.<sup>24</sup>. The differences between e-WOMAC and p-WOMAC scores were expressed as  
49 the mean scores (with standard errors) as 2.95 (5.53). Consequently, with a type I error  
50 at 0.05 and type II error at 0.10 considering a 1:1 allocation rate and a drop-out rate of  
51 10%, the minimum number of participants needed was 35 per group; a total of 70  
52 subjects.  
53  
54  
55  
56  
57  
58

59 The formula for calculating sample size is as follows:  
60

$$n = \frac{(t_{\alpha} + t_{\beta})^2 \sigma^2}{\delta^2}$$

## Instrument

WOMAC is a widely used self-administered evaluation tool, which can be completed within 5-10 minutes. Research shows that this scale has objective reliability, effectiveness and sensitivity for evaluation of the knee joint, and it is an evaluation scale that has been widely used for patients with OA. The WOMAC rating scale assesses the structure and function of the hip and knee in terms of pain, stiffness, and joint function. There are 24 items in all covering the basic symptoms and signs of OA, 5 items for the pain part, 2 items for the stiffness part, and 17 items for the joint function part, among which each item has a scale bar without scale line, representing the range of 0-10 points, the starting point on the left side of the scale is 0 point, representing none, and the end point on the right side is 10 points, representing extreme severity.<sup>25</sup> The regular paper-based WOMAC requires the patient to fill out based on his or her symptoms and signs within 48 hours, which is then measured by a physician based on the location. E-WOMAC, a Chinese-language electronic scale for self-assessment of patients with KOA, used in the study was developed by Shanghai Jsurre Health Co. The text portion of e-WOMAC is identical to WOMAC VAS 3.1. For the first time, the patient needs to scan the QR code and download the Epdata software. After registration and login, patients can fill in the electronic version of WOMAC (figure.2), swipe the ruler on the screen according to their symptoms and signs within 48 hours, and submit after completing the answers. Doctors can directly receive the score data of patients in the Epdata database (figure.3).

## Additional Questions

In the end of the study, a simple questionnaire has been designed to investigate subjects' perceptions of the study and the propensity for paper-based or electronic version of WOMAC. The questions will involve the description of the advantages and disadvantages of two WOMACs.

## Interventions

Other medications and treatments for KOA, including oral medications, topical plasters, acupuncture, acupotomy, and arthroscopy will not be available during the study period. If the patient needs additional treatment, they need to contact the doctor in advance. To increase the participation of the patients, we make sure all the treatment of the subjects during the study is free of charge, and the subjects in the trial can have X-ray and MRI images free of charge and receive appropriate transportation subsidy. During the intervention, taking celecoxib has a very small probability of certain digestive tract symptoms, such as vomiting and constipation. The investigator will make every effort to prevent and treat any harm that may result from this study. If adverse events occur in the clinical trial, a committee of medical experts will determine whether it is associated with the treatment. The sponsor will provide the cost of treatment and the corresponding financial compensation for the damage related to the trial in accordance with the Provisions of China's "Standard of Quality Management of Clinical Trials for Drugs". Moreover, we need them to record their medication-taking behavior in time so as to improve their adherence to the study which helps minimize the error.

## Primary outcomes

The primary outcome of the current study is the mean score difference in WOMAC. This method has been found to be a semi-quantitative rating scale with better reliability and validity and more balanced empirical evidence.<sup>18</sup> The Chinese e-WOMAC which contains 24 different items split up into 3 subscales: pain subscale (5 items), stiffness subscale (2 items) and physical function subscale (17 items) will be asked to patients. Primary outcomes will be analyzed and reported in two ways. First, we will compare the difference in the respective score of e-WOMAC and p-WOMAC before and after the intervention. Then, we will investigate patients' acceptance of two forms of the WOMAC through a simple self-made questionnaire.

## Secondary outcomes

Additionally, the secondary outcomes include the WOMAC VAS 3.1 Pain Scale (ranging from 0 (no pain during movement) to 500 (extreme pain during movement)), the WOMAC Stiffness Scale (ranging from 0 to 200 with higher scores meaning more severe limitation) and the WOMAC Physical Function Scale (ranging from 0 to 1700, with higher scores indicating more serious impairment during activities). The secondary outcome analyses will be assessed similarly to the main endpoint analyses.

## Data collection and management

We will gather information at every stage of recruitment, randomization and treatment so that we can report flow of patients according to the CONSORT guidelines. Once a subject is enrolled or randomized, the study site will make every reasonable effort to follow the subject for the entire study period. Considering the purpose of this study, the data of subjects with complete efficacy data before and after treatment will be included in the statistical analysis.

The paper questionnaire will be completed by subjects alone and data will be collected by trained investigators, then reached the database. The electronic questionnaire will be completed by subjects alone via the smartphone application. The score of e-WOMAC will be entered into an excel file and then analyzed by SPSS. Note that time intervals between two assessments should be 15 minutes in order to eliminate the influence of memory and maintain data quality and objectivity.

## Statistical analysis

The aim of the study is to describe a randomized trial designed to test the effectiveness and reliability of mobile phone application for assessment of KOA compared with traditional mode of pen-and-paper based, episodic, onsite evaluation. As the average scores of the two versions of the outcome measures are the same, there may also be significant differences in the scores of individual respondents, and/or differences on certain items. The total score and each dimension of e-WOMAC and p-

1  
2  
3  
4 WOMAC will be separately analyzed. All data analysis will be performed  
5 by SPSS17.0 statistics software, mean  $\pm$  standard deviation (SD) is used to described  
6 the metrological data following the normal distribution while median (M) and  
7 interquartile range (Q) are used to described the data not following the normal  
8 distribution.  
9  
10  
11  
12

13 First, two conditions will be compared at baseline with a between-group analysis  
14 via a t-test in order to ensure there is no difference between randomization groups.  
15 To test our hypothesis, in the first stage calculate difference scores of each participant  
16 (difference  $d = \text{paper WOMAC score} - \text{electronic WOMAC score}$ ) and the data will be  
17 analyzed for normality by the Shapiro-Wilks test. For the primary outcomes we will  
18 use the total WOMAC score directly, while for the secondary outcomes  
19 WOMAC subscale scores will be rescaled to a 0-100 scale before calculation. A  
20 paired t-test will be used to calculate the mean score difference if data is normally  
21 distributed, and the results will be reported as 95% confidence intervals between  
22 differences in means, if not, Wilcoxon rank-sum test will be used. Two factor ANOVA  
23 model will be used to account for any differences due to the order of completing the  
24 paper and electronic WOMAC index. In the third stage, the same statistical analysis  
25 will be performed after the intervention the same as the first stage in order to investigate  
26 whether the WOMAC score of both high and low levels of KOA has good consistency.  
27  
28  
29  
30  
31  
32  
33  
34  
35  
36  
37  
38  
39  
40

41 To test the consistency of two versions of the WOMAC, an allowed range is  
42 defined (i.e. a value for the mean difference that needed to be exceeded to determine  
43 that the two WOMACs are not equivalent). As there is great inter-individual variability  
44 between different patients, a limit of equivalence will be determined based on the  
45 outcome measure of the pre-experiment to provide a strict test of the equivalence of  
46 two WOMACs. If the mean (and its 95% confidence interval) of the difference falls  
47 within the allowable ranges, then we can gain the credible evidence of equivalence of  
48 scoring system of the WOMAC.  
49  
50  
51  
52  
53  
54  
55

56 Answers to open-ended questions will be subjected to a simple content analysis,  
57 categorized as positive, negative, or neutral comments on the e-WOMAC or p-  
58 WOMAC.  
59  
60

1  
2  
3  
4 For the condition of shedding samples that may occur in the current study, we will  
5 have strict criterion and the statistical analysis will only include patients who participate  
6 in the whole process of the study from enrollment to post-intervention assessment.  
7  
8  
9

## 10 11 **Data monitoring**

12  
13  
14 An external data monitoring committee was not deemed to be necessary for this  
15 trial. Data will be monitored by the research team which includes clinicians,  
16 statisticians and information technology experts. This study is considered to be a low-  
17 risk trial where both the intervention and control groups will receive their usual medical  
18 care. The expected duration of the trial lasts only 1 month and the use of the application  
19 does not present with high risk, there won't be any stopping guidelines to terminate the  
20 trial nor interim analysis planned.  
21  
22  
23  
24  
25  
26  
27  
28  
29

## 30 31 **Patient and public involvement**

32 This research is planned to be done without patient involvement. The patients will  
33 not be invited to comment on the study design or be consulted on developing patient-  
34 relevant outcomes. The future manuscript will not be edited by patients for readability  
35 or accuracy.  
36  
37  
38  
39

## 40 41 **Discussion**

42 Since KOA is characterized by chronic progressive degeneration of articular  
43 cartilage, its assessment involves a complex process and requires an overall evaluation  
44 of the patients' condition for a better clinical outcome. However today in China, many  
45 residents don't have the access to family doctors, so they usually need to go to hospital  
46 for treatment. The inconvenience in visiting doctors may cause delay in treatment.  
47 Smartphone application for electronic data capture appears to be an innovative and  
48 promising alternative to the original assessment methods as smartphone application  
49 have already been proved to be accurate tools.  
50  
51  
52  
53  
54  
55  
56  
57

58 However, it would be unwise to consider transforming a traditional paper-based  
59 patient-reported outcomes measure to an electronic version for use in the clinical  
60



1  
2  
3  
4 practice and research if the equivalence of the two versions hasn't been proved. In this  
5 study protocol, we describe an unblinded trial designed to test a newly developed  
6 technology-based KOA assessment consisting of a mobile phone application for  
7 patients, which is linked to the physicians. Specifically, we want to explore the  
8 reliability and comparability of electronic and paper versions of the WOMAC and  
9 whether EDC can help improve treatment adherence by meeting patients' preferences.  
10  
11  
12  
13  
14

15 To the best of our knowledge, this is the first study to test the reliability of the  
16 Chinese electronic WOMAC for KOA assessment. If our hypothesis is confirmed, the  
17 findings will serve to demonstrate the equivalence of electronic and paper versions of  
18 WOMAC and patients' acceptance of Chinese e-WOMAC so that it can be  
19 implemented in clinical practice and research. Likewise, our results will further  
20 demonstrate the feasibility of e-health for the personalized KOA therapy. (i.e.  
21 timely adjustment of the treatment plan can be rapidly given patients based on self-  
22 reported ePRO with the help of smartphone application)  
23  
24  
25  
26  
27  
28  
29  
30

31 We anticipate that with the support of EDC, physicians will be able to receive  
32 timely feedback on patients' conditions, which will significantly improve the  
33 visiting rate and treatment rate due to the convenience of telemedicine and rapid  
34 response to unwanted events. Note that KOA is a common chronic disease in the elderly,  
35 the study will explore the feasibility of enabling the Chinese e-WOMAC for patients'  
36 long-term use.  
37  
38  
39  
40  
41

42 However, using EDC systems may still have some limitations. The degree  
43 of familiarity with the electronics is not entirely consistent between different  
44 population, especially considering the factors of age, social status and other general  
45 factors. For example, some patients who don't have communication vehicles or cannot  
46 permit proper use of the application may be excluded from online medical service. In  
47 addition, psychological factors may have a relevant influence on filling  
48 out the questionnaire leading to the condition that patients feel non-adapted, have  
49 difficulty in using the smartphone or even failed to complete the questionnaire.<sup>26 19</sup>  
50 Accordingly, we can make some necessary adjustments of the application. In sum, the  
51 results of the present investigation may help to find new ways of developing  
52  
53  
54  
55  
56  
57  
58  
59  
60



1  
2  
3  
4 smartphone application and information and communication technology in the medical  
5 field.  
6  
7

### 8 9 **Data management and oversight**

10  
11 In order to ensure protocol compliance, proper study management, and timely  
12 completion of study procedures, members of the research team from Shuguang Hospital  
13 Affiliated to Shanghai University of Traditional Chinese Medicine will take  
14 responsibility for the conduct of all research staff and study participants.  
15  
16  
17  
18

### 19 20 **Protocol and registration**

21  
22 The trial is registered with the ChiCTR, ChiCTR2100050914. Registered on 8 Sep 2021,  
23 <https://www.chictr.org.cn/showproj.aspx?proj=133521>  
24  
25  
26  
27  
28

### 29 30 **Data storage security and patient confidentiality**

31 Patients' medical records (descriptive characteristics like name initials, allocated study  
32 number, sex, age, BMI, outcome measures like primary outcomes and secondary  
33 outcomes and laboratory results) will be kept in the respective hospital, and physicians  
34 will document the findings of the study in it, allowing  
35 researchers and ethics committees to access the data. Personal information of patients  
36 will not be revealed in the results of this study, and we will try everything we  
37 can to protect patients' privacy and medical data within the Chinese law. According to  
38 medical research ethics, experimental data especially personal privacy information will  
39 not be allowed to be accessed and shared by the public and will be limited to web-based  
40 databases to ensure that personal privacy information is not disclosed.  
41  
42  
43  
44  
45  
46  
47  
48  
49  
50

### 51 52 **Ethics and dissemination**

53 The protocol for this trial has been approved by the Independent Review Board of  
54 SGH (approval number: 2020-814-21-01). All participants will be required to sign an  
55 informed consent form before enrollment in this study. The model consent form and  
56 other related documentation given to participants can be provided upon request. (see  
57 online supplementary file)  
58  
59  
60

## Abbreviations

KOA: Knee osteoarthritis; WOMAC: Western Ontario and McMaster Universities Arthritis Index; e-WOMAC: electronic version of the WOMAC; p-WOMAC: paper-based WOMAC; e-health: online medical system; PRO: patient-reported outcomes; EDC : electronic data capture; SGH: Shuguang Hospital Affiliated to Shanghai University of Traditional Chinese Medicine.

## Acknowledgements

Acknowledgment is given to Shanghai Jsure Health Co. for its technical support of the application. The authors would also like to thank staff and students at Shuguang Hospital Affiliated to Shanghai University of Traditional Chinese Medicine for their contributions to the implementation of this study.

## Author information

### Affiliations

**Shuguang Hospital Affiliated to Shanghai University of Traditional Chinese Medicine, Shanghai, China**

Wei'an Yuan, Yuxin Zheng, Hong Sheng Zhan, Yujie zhang, Ye zhao, Kaoqiang liu, Yongli chai

**Shanghai Jsure Health Co., Ltd, Shanghai, China**

Feng lin

### Authors' contributions

YJZ and YZ are the co-first authors. WAY, YXZ and HSZ designed the study. YJZ, YZ, KQL and YLC interpreted data. YJZ was responsible for writing of report, literature search, and selection of relevant articles. FL was responsible for the technical service of e-WOMAC.

### Funding

This trial was funded by Special project for clinical research of Shanghai Municipal Health Commission (201940063); 2. Special project for biomedical science and technology support of Shanghai "science and technology innovation action plan" (20S21902100); 3. Shanghai Shenkang hospital development center "municipal hospital hospital enterprise collaborative clinical trial management project" (20CR4003B); 4. "Xinglin Xinxing" project of Shanghai Municipal Commission of health and family planning (ZYSNXD011-RC-XLXX-20130049); 5. National Natural Science Foundation of China (81403414); 6. "Integrated traditional Chinese and Western Medicine-Chinese patent medicine clinical evaluation platform" (A1-U21-205-0103). 7. Three-year clinical action plan of Shanghai Shenkang Hospital Development Center (SHDC2020CR1051B); 8. Shanghai chronic musculoskeletal disease clinical medical research center (20MC1920600).

**Disclaimer**

The funding organization has not played any role in the design and conduct of the study; collection, management, analysis, or interpretation of the data; or preparation of the manuscript.

**Competing interests**

The authors declare that they have no competing interests. This study is public welfare, we only entrust Shanghai Jsurre Health Co. to provide e-WOMAC software based on the technical advantages of the company.

**Patient consent for publication**

Not required

**Availability of data and material**

The datasets analyzed during the current study will be available from the corresponding author on reasonable request.

**Consent for publication**

Not applicable

## References

- 1 Michael JW, Schlüter-Brust KU, Eysel P. The epidemiology, etiology, diagnosis, and treatment of osteoarthritis of the knee [published correction appears in *Dtsch Arztebl Int*. 2010 Apr;107(16):294]. *Dtsch Arztebl Int*. 2010;107(9):152-162.
- 2 Loeser RF, Goldring SR, Scanzello CR, Goldring MB. Osteoarthritis: a disease of the joint as an organ. *Arthritis Rheum*. 2012;64(6):1697-1707.
- 3 Cross M, Smith E, Hoy D, et al. The global burden of hip and knee osteoarthritis: estimates from the global burden of disease 2010 study. *Ann Rheum Dis*. 2014;73(7):1323-1330.
- 4 O'Neill TW, McCabe PS, McBeth J. Update on the epidemiology, risk factors and disease outcomes of osteoarthritis. *Best Pract Res Clin Rheumatol*. 2018;32(2):312-326.
- 5 Culvenor AG, Øiestad BE, Hart HF, Stefanik JJ, Guermazi A, Crossley KM. Prevalence of knee osteoarthritis features on magnetic resonance imaging in asymptomatic uninjured adults: a systematic review and meta-analysis. *Br J Sports Med*. 2019;53(20):1268-1278.
- 6 Tang X, Wang S, Zhan S, Niu J, Tao K, Zhang Y, Lin J. The Prevalence of Symptomatic Knee Osteoarthritis in China: Results From the China Health and Retirement Longitudinal Study. *Arthritis Rheumatol*. 2016 Mar;68(3):648-53.
- 7 Y. H. Lu and X. B. Shi, "Status and progress of epidemiological research on knee osteoarthritis at home and abroad," *Chinese Journal of Orthopedics and Traumatology of Traditional Chinese Medicine*, vol. 20, no. 6, pp. 81-84, 2012, in Chinese.
- 8 Pollard B, Johnston M, Dixon D. Exploring differential item functioning in the Western Ontario and McMaster Universities Osteoarthritis Index (WOMAC). *BMC Musculoskelet Disord*. 2012 Dec 29;13:265.
- 9 Ghomrawi HMK, Mancuso CA, Dunning A, Gonzalez Della Valle A, Alexiades M, Cornell C, Sculco T, Bostrom M, Mayman D, Marx RG, Westrich G, O'Dell M, Mushlin AI. Do Surgeon Expectations Predict Clinically Important Improvements in WOMAC Scores After THA and TKA? *Clin Orthop Relat Res*. 2017 Sep;475(9):2150-2158.
- 10 van Netten JJ, Clark D, Lazzarini PA, Janda M, Reed LF. The validity and reliability of remote diabetic foot ulcer assessment using mobile phone images. *Sci Rep*. 2017 Aug 25;7(1):9480.
- 11 Zhang C, Fan L, Chai Z, Yu C, Song J. Smartphone and medical application use among dentists in China. *BMC Med Inform Decis Mak*. 2020 Sep 7;20(1):213.
- 12 Falter M, Budts W, Goetschalckx K, Cornelissen V, Buys R. Accuracy of Apple Watch Measurements for Heart Rate and Energy Expenditure in Patients With Cardiovascular Disease: Cross-Sectional Study. *JMIR Mhealth Uhealth*. 2019 Mar 19;7(3):e11889.
- 13 Bellamy N, Patel B, Davis T, Dennison S. Electronic data capture using the Womac NRS 3.1 Index (m-Womac): a pilot study of repeated independent remote data capture in OA. *Inflammopharmacology*. 2010;18(3):107-111.
- 14 Bellamy N, Wilson C, Hendrikz J, Patel B, Dennison S. Electronic data capture (EDC) using cellular technology: implications for clinical trials and practice, and preliminary experience with the m-Womac Index in hip and knee OA patients. *Inflammopharmacology*. 2009;17(2):93-99.
- 15 Anderson JG, Wixson RL, Tsai D, Stulberg SD, Chang RW. Functional outcome and patient satisfaction in total knee patients over the age of 75. *J Arthroplasty*. 1996 Oct;11(7):831-40.
- 16 Bishop FL, Lewis G, Harris S, McKay N, Prentice P, Thiel H, Lewith GT. A within-subjects

1  
2  
3  
4  
5 trial to test the equivalence of online and paper outcome measures: the Roland Morris disability  
6 questionnaire. *BMC Musculoskelet Disord*. 2010 Jun 8;11:113.

7 17 Raat H, Mangunkusumo RT, Mohangoo AD, Juniper EF, Van Der Lei J. Internet and written  
8 respiratory questionnaires yield equivalent results for adolescents. *Pediatr Pulmonol*. 2007  
9 Apr;42(4):357-61.

10 18 Leece P, Bhandari M, Sprague S, Swiontkowski MF, Schemitsch EH, Tornetta P, Devereaux PJ,  
11 Guyatt GH. Internet versus mailed questionnaires: a randomized comparison (2). *J Med Internet*  
12 *Res*. 2004 Sep 24;6(3):e30. 2004 Oct 29;6(4):e38. Corrected and republished in: *J Med Internet Res*.  
13 2004 Oct 29;6(4):e39.

14 19 Bälter KA, Bälter O, Fondell E, Lagerros YT. Web-based and mailed questionnaires: a  
15 comparison of response rates and compliance. *Epidemiology*. 2005 Jul;16(4):577-9.

16 20 Theiler R, Bischoff-Ferrari HA, Good M, Bellamy N. Responsiveness of the electronic touch  
17 screen WOMAC 3.1 OA Index in a short term clinical trial with rofecoxib. *Osteoarthritis Cartilage*.  
18 2004 Nov;12(11):912-6.

19 21 Bischoff-Ferrari HA, Vondechend M, Bellamy N, Theiler R. Validation and patient acceptance  
20 of a computer touch screen version of the WOMAC 3.1 osteoarthritis index. *Ann Rheum Dis*. 2005  
21 Jan;64(1):80-4.

22 22 Theiler R, Spielberger J, Bischoff HA, Bellamy N, Huber J, Kroesen S. Clinical evaluation of  
23 the WOMAC 3.0 OA Index in numeric rating scale format using a computerized touch screen  
24 version. *Osteoarthritis Cartilage*. 2002 Jun;10(6):479-81.

25 23 Symonds T, Hughes B, Liao S, Ang Q, Bellamy N. Validation of the Chinese Western Ontario  
26 and McMaster Universities Osteoarthritis Index in Patients From Mainland China With  
27 Osteoarthritis of the Knee. *Arthritis Care Res (Hoboken)*. 2015 Nov;67(11):1553-60.

28 24 Bellamy N, Wilson C, Hendrikz J, et al. Osteoarthritis Index delivered by mobile phone (m-  
29 WOMAC) is valid, reliable, and responsive. *J Clin Epidemiol*. 2011;64(2):182-190.

30 25 Kwon SB, Ku Y, Han HU, Lee MC, Kim HC, Ro DH. A machine learning-based diagnostic  
31 model associated with knee osteoarthritis severity. *Sci Rep*. 2020 Sep 25;10(1):15743.

32 26 Benhamou M, Baron G, Dalichampt M, Boutron I, Alami S, Rannou F, Ravaud P, Poiraudou  
33 S. Development and validation of a questionnaire assessing fears and beliefs of patients with knee  
34 osteoarthritis: the Knee Osteoarthritis Fears and Beliefs Questionnaire (KOFBeQ). *PLoS One*.  
35 2013;8(1):e53886.

## Figure Legend

### Figure1: Flow chart of the study

### Figure2: Examples of the web for the subjects

(a) the Chinese e-WOMAC app interface after login;

(b) location of knee osteoarthritis: The picture shows the assessed joint (‘您不舒服的地方’ means where do you feel uncomfortable? ‘左膝’ means left knee; ‘右膝’ means right knee ; ‘双膝’ means both sides of knee);

(c) e-WOMAC assessment of pain intensity: The picture shows a question about the level of the pain up and down the stairs in the WOMAC pain subscale.( ‘上楼梯或下楼梯’ means go upstairs and downstairs. Then choose pain level according to your feelings, the right end of the scale bar means extreme pain and the left means no pain.)

**Figure3: Examples of the web for the physician** (a)details and operation of subjects’ data; (b)the score of each question; (c)total score as well as pain, stiffness and physical function subscale scores of e-WOMAC.

1  
2  
3  
4  
5  
6  
7  
8  
9  
10  
11  
12  
13  
14  
15  
16  
17  
18  
19  
20  
21  
22  
23  
24  
25  
26  
27  
28  
29  
30  
31  
32  
33  
34  
35  
36  
37  
38  
39  
40  
41  
42  
43  
44  
45  
46

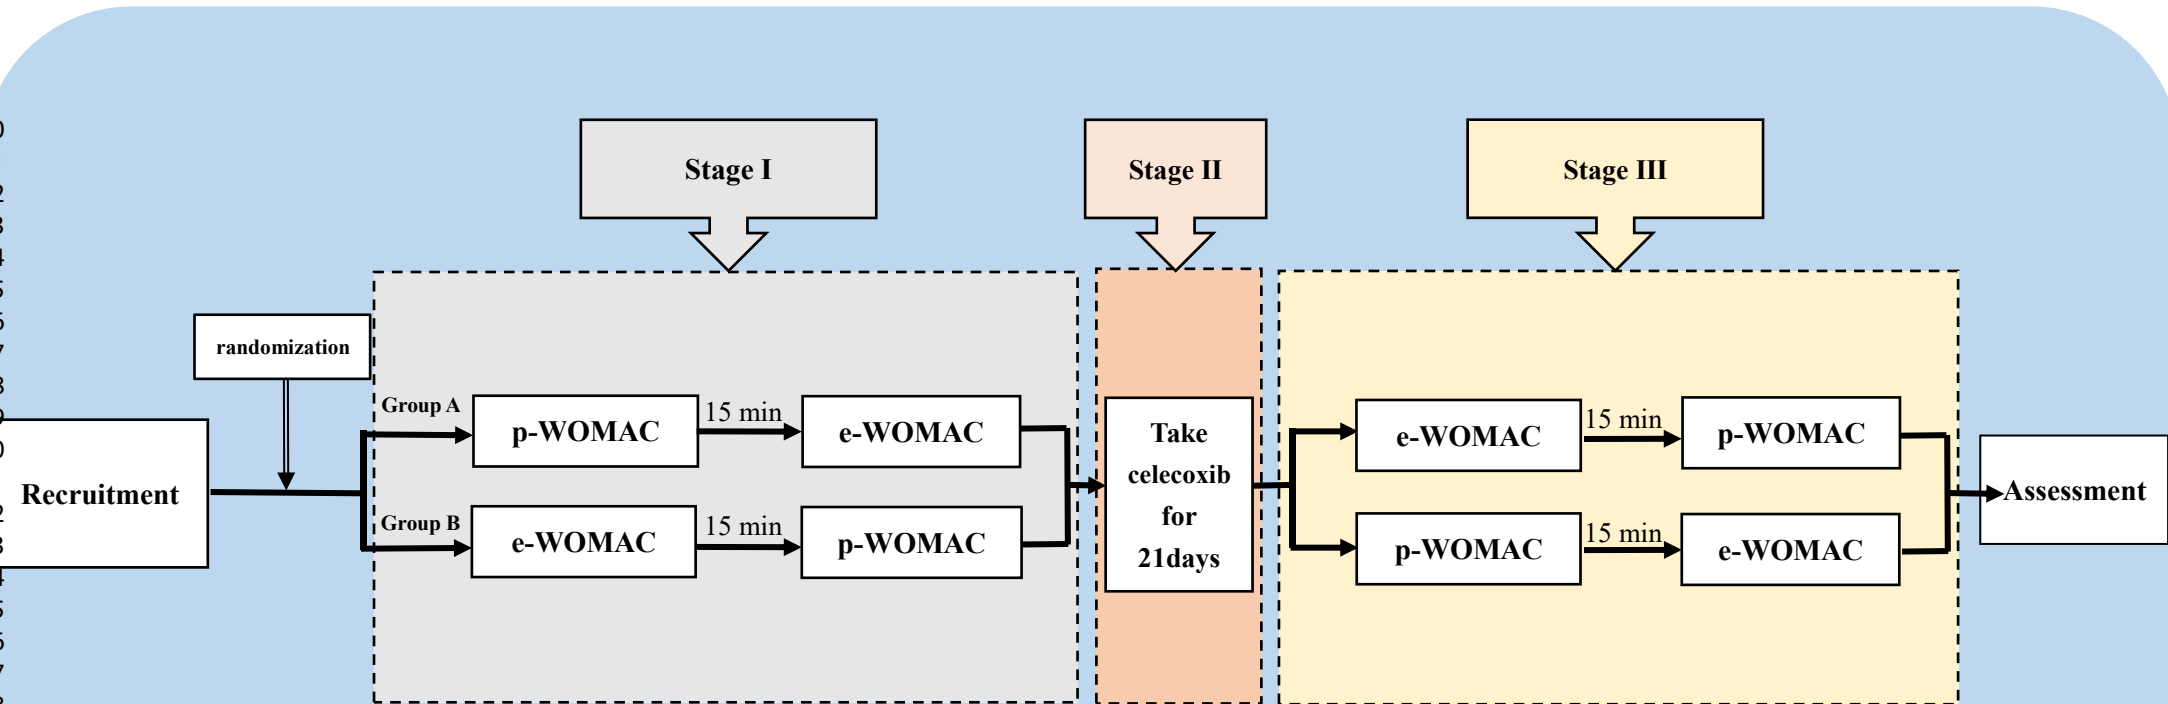

**Fig. 1** Flow chart of the study

ePData

点击按钮进入应用

开始

您的医生已经选择了您的研究关节，如果您确定不了哪一处才是您的研究关节，请在填写本调查表以前询问清楚。

您不舒服的地方？

左膝  右膝  双膝

返回

下一步

请根据您在过去48小时内感觉到的膝关节【疼痛程度】将下方的三角滑块滑到合适的位置。

(2) 上楼梯或下楼梯

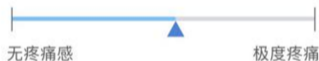

上一步

下一步

(a)

(b)

(c)



- 1 首页
- 2 报表
- 3 受试者数据
- 4 管理
- 5 患者
- 6 我注册
- 7
- 8
- 9
- 10
- 11
- 12
- 13
- 14
- 15
- 16
- 17
- 18
- 19
- 20
- 21
- 22
- 23
- 24
- 25
- 26
- 27
- 28
- 29

数据列表 (中心编号:01)

数据列表 受试者列表

日志填写完成开始时间 日志填写完成结束时间 全部状态 全部受试者编号 全部数据

搜索

| 受试者编号  | 日志填写完成时间                        | 日志名称 | 上传时间                            | 最近修改时间                          | 阶段  | 状态 | 操作 |
|--------|---------------------------------|------|---------------------------------|---------------------------------|-----|----|----|
| S01004 | 2021-09-26 17:08:52 (UTC+08:00) | 问卷评估 | 2021-09-26 17:08:52 (UTC+08:00) | 2021-09-26 17:08:52 (UTC+08:00) | 治疗期 | 有效 | 操作 |
| S01004 | 2021-07-21 19:50:58 (UTC+08:00) | 问卷评估 | 2021-07-21 19:50:58 (UTC+08:00) | 2021-07-21 19:50:58 (UTC+08:00) | 治疗期 | 有效 | 操作 |
| S01004 | 2021-07-21 19:48:50 (UTC+08:00) | 问卷评估 | 2021-07-21 19:48:50 (UTC+08:00) | 2021-07-21 19:48:50 (UTC+08:00) | 治疗期 | 有效 | 操作 |
| S01004 | 2021-07-21 19:47:33 (UTC+08:00) | 问卷评估 | 2021-07-21 19:47:33 (UTC+08:00) | 2021-07-21 19:47:33 (UTC+08:00) | 治疗期 | 有效 | 操作 |
| S01004 | 2021-07-21 19:47:04 (UTC+08:00) | 问卷评估 | 2021-07-21 19:47:04 (UTC+08:00) | 2021-07-21 19:47:04 (UTC+08:00) | 治疗期 | 有效 | 操作 |
| S01004 | 2021-07-21 19:46:33 (UTC+08:00) | 问卷评估 | 2021-07-21 19:46:33 (UTC+08:00) | 2021-07-21 19:46:33 (UTC+08:00) | 治疗期 | 有效 | 操作 |
| S01004 | 2021-07-21 19:45:45 (UTC+08:00) | 问卷评估 | 2021-07-21 19:45:45 (UTC+08:00) | 2021-07-21 19:45:45 (UTC+08:00) | 治疗期 | 有效 | 操作 |

(a)

日志详情

受试者编号: S01004

日志名称: 问卷评估

日志填写完成时间: 2021-06-10 20:23:15 (UTC+08:00)

日志上传时间: 2021-06-10 20:23:15 (UTC+08:00)

最近修改时间: 2021-06-10 20:23:15 (UTC+08:00)

阶段: 治疗期

状态: 有效

您不舒服的地方?

左膝:

疼痛程度: (1) 在平坦的路上行走 63;

疼痛程度: (2) 上楼梯或下楼梯 65;

疼痛程度: (3) 晚上,在床上时,就是说打扰您睡觉的疼痛 60;

疼痛程度: (4) 弯腰时 71;

|    |                             |
|----|-----------------------------|
| 23 | 行动障碍的程度: (23) 做繁重的家务活问题 54; |
| 24 | 行动障碍的程度: (24) 做轻松的家务活 48;   |
| 25 | 疼痛评分 294;                   |
| 26 | 僵硬评分 140;                   |
| 27 | 功能评分 1027;                  |
| 28 | womac总评分 1461;              |

(b)

(c)

## Informed Consent•informed consent page

**Dear Sir/Madam :**

You are invited to participate in the study “**Test reliability and comparability of paper and Chinese electronic version of the Western Ontario and McMaster University osteoarthritis index: a randomized controlled clinical trial**”.

Read the instructions on this page carefully which can help you understand the study including the procedure and duration of the study, and the benefits, risks and discomforts that may be brought to you after participating in it and why it was conducted, before you decide whether or not to take part in this research study. Discuss it with friends and relatives if you wish, or please consult your doctor to help you to reach a decision.

### Introduction

#### Background and Study Aims

Knee osteoarthritis (KOA) is the most common chronic, progressive and degenerative joint disease in middle and old age. It is characterized by articular cartilage degeneration, osteosclerosis and hyperplasia. Major clinical manifestations of KOA include progressive knee joint pain, swelling, stiffness, dysfunction, severe deformation of joints, and even loss of joint function. KOA can lead to pain and dysfunction of the lower limb and affect patients' normal life and work. The worldwide prevalence of KOA is increasing, reported to be between 3.8% in 2010, and with an estimated 25,000 people suffer from KOA in 2018. There is radiographic evidence of knee osteoarthritis in up to 14% in asymptomatic uninjured adults aged < 40 years and 43% of middle-aged population. In China, approximately 8.1% of Chinese people are affected by KOA. KOA can greatly affect the patients' health and quality of life. Today, its incidence tends to increase with the advent of an aging society. With increased demand for health, people are becoming more aware of the need for early diagnosis, timely intervention, minimal damage and better prognosis. Patient-reported outcomes (PRO) can truly reflect patients' health status and treatment outcomes, and have played a significant part in diagnosis and treatment for chronic progressive diseases.

By this research, we aim to provide conclusive evidence for developing patient-centered online health application. We hypothesize that the equivalent between two formats of the WOMAC(paper based WOMAC index and electronic WOMAC index) will be proved, then our study objectives is to assess: 1.The comparability of results generated from these two WOMACs. 2.Subjects' acceptance and satisfaction with the Chinese electronic WOMAC index.

This study will be conducted at Shuguang Hospital Affiliated to Shanghai University of Traditional Chinese Medicine (1 clinical research center) in China. A total of 70 patients volunteered to participate in this study. This research project is supported by the Shanghai Municipal Health Commission (Project No. 201940063). The protocol for this trial has been approved by the Independent Review Board of SGH (approval number: 2020-814-21-01) and complies with relevant provisions of Helsinki Declaration on the protection of the rights and interests of subjects.

#### Inclusion and exclusion criteria

### **Inclusion criteria**

① patients who meet the KOA diagnostic criteria of Osteoarthritis Diagnosis and Treatment Guidelines (2018 edition) issued by the Joint Surgery Group of the Orthopaedic Society of the Chinese Medical Association;

② patients aged 40 to 70 years, including 40 and 70 years, male or female;

③ KL classification  $\leq$  grade 3;

④ patients who have a mobile phone and can use the application proficiently;

⑤ patients who understand Chinese language and can complete the WOMAC independently;

⑥ patients who have signed the informed consent;

### **Exclusion criteria**

① patients with acute meniscus injury, peripheral ligament rupture injury, rheumatic arthritis, rheumatoid arthritis, peripheral tumor of knee joint, tuberculosis, idiopathic osteonecrosis of the knee;

② patients with serious cardiovascular, lung, liver, kidney and hematopoietic diseases, hemophilia and other hemorrhagic diseases, mental illness, pregnancy and lactation;

③ patients who are allergic or intolerant to trial medication;

④ Patients who had received other treatments in the last 2 months has an effect on the study;

⑤ patients who are deemed unsuitable for the clinical trial.

### **What do you need to do if you participate in this study?**

1、 If you meet the inclusion criteria and agree to participate, the study will be conducted as follows:

After you have determined that you can participate in this study, you will have a treatment plan developed by your clinician and perfect routine laboratory tests. In the first stage, you will be evaluated by paper version of WOMAC index and electronic version of WOMAC index on day 1, In the second stage, 200mg celecoxib will be administered orally once a day starting from the second day of enrollment for a period of 21 days. In the third stage, you will complete both scales again and the tendency questionnaire, and count changes in the condition in the hospital and during follow-up. In addition to this, you do not need laboratory tests such as blood tests throughout your study. Your research doctor will give you health guidance, and you can always contact your research doctor for any questions you may have related to knee osteoarthritis.

2、 Other things you need to cooperate with:

During the study period, without affecting your health and daily life, please not to use any kind of medication including analgesics that might affect the study outcomes. If you need additional treatment for various reasons, please also provide us with the relevant information.

### **Benefits from participating in the study**

Participating in this clinical study, your condition may improve. You can get more medical advice and guidance related to this disease as you proceed with this trial.

Your participation will also contribute to the research of rehabilitation exercises for knee osteoarthritis, which is of social significance for the treatment of this disease and for other patients with such diseases.

### **Risks from participation in this study**

This study was designed as a interventional study. During the intervention, taking celecoxib has a very small probability of certain digestive tract symptoms, such as vomiting and constipation.

If you experience any discomfort during the study, there is a new change in your condition or any unexpected circumstances, whether or not related to the study, you should promptly notify your doctor, who will judge and give appropriate medical treatment.

During the study period, you need to follow up at the hospital on time and do some tests, which take up some of your time and may cause trouble or inconvenience.

### **Costs and compensation for study participation**

Patients do not need to pay out-of-pocket expenses for the diagnosis and treatment of KOA in clinical trials. Additionally, there will be no financial compensation for the study participation because the examination items in this study are clinical follow-up programs.

If adverse events occur in the clinical trial, a committee of medical experts will determine whether it is associated with the treatment. The sponsor will provide the cost of treatment and the corresponding financial compensation for the damage related to the trial in accordance with the Provisions of China's "Standard of Quality Management of Clinical Trials for Drugs".

The evaluation, diagnosis and treatment required for combined diseases will not be covered free of charge.

### **Is personal information confidential?**

Information about your participation in this study will be recorded in the study medical records/case report form. All the medical record of the original studies including descriptive characteristics like name initials, allocated study number, sex, age, BMI, outcome measures like primary outcomes and secondary outcomes and laboratory results are treated with standard medical confidentiality and confidential to the extent allowed by law.

In the clinical record form, only your name initials and allocated study number will appear. In relevant research summaries, articles, and public journals, only the initials and numbers of your name will appear if necessary.

When necessary, pharmaceutical supervisory and administrative departments, the ethical committee and the project funding department may consult the information of the subjects participating in the study according to regulations. However, they would not use the data of the participants in the study for other purposes or leak it to other groups without permission.

### **How to get more information?**

You can ask any questions about this study at any time.

Your doctor will leave you his/her phone number so that he/she can answer your questions.

If there is any important new information during the course of the study that may affect your willingness to continue with the study, your doctor will notify you in a timely manner.

### **You may voluntarily choose to participate in the study and quit the study halfway**

Whether you participate in this research is entirely voluntary. You are free to refuse to participate in this study or to withdraw at any time without affecting any benefits to which you

would otherwise be entitled and be discriminated against or be subject to any reprisal.

Your doctor or researcher may suspend your participation in this study at any time for the best interest of the subject. You may be consulted about your use of the study drug if you quit the study for any reason.

If clinician feel examination is required, you may also be asked for physical examination and laboratory tests. You may also refuse without discrimination or retaliation for it.

If you choose to participate in this study, we expect you to complete the research.

If you do not participate in this study, your research physician will provide you with alternative treatment options, such as other drug or exercise therapies for knee osteoarthritis.

### **What should you do at the present time?**

It is up to you to decide whether or not to participate in this study. You can discuss with your family or friends and ask your doctor as many questions as possible until you fully understand the study before making a decision.

### **Ethics committee**

If you have questions or need to ask anyone other than the investigator, please consult the Ethics Committee of Shanghai Shuguang Hospital.

Ethics Committee Office: The second floor of the eastern administration of Shuguang Hospital

Tel.: 20256070

Thank you for reading the above material. If you decide to participate in this study, tell your doctor and he/she will arrange everything for you to do with the study.

Please keep this information sheet.

## Informed Consent•consent signature page

Project name: Test reliability and comparability of paper and Chinese electronic version of the Western Ontario and McMaster University osteoarthritis index: a randomized controlled clinical trial

Project source: Shanghai Municipal Health Commission

Project version: V1.0

Project date: January 10, 2019

### Consent statement

I have read the above statements of this study and were given the chance to discuss the study with and ask questions to the investigator. Any questions I had were answered to my full satisfaction.

I am aware of the risks and benefits that may arise from participating in this study. I am aware that participation in the study is on a voluntary basis. I have had enough time to think about my participation in the study, and I understand that:

- I can always ask the doctor for more information.
- I can withdraw from the study at any time without detriment, and medical care and treatment will not be affected.

I was also very much aware that if I tell the doctor about the change in my condition and complete the physical examination and laboratory test particularly for reasons of drug in case of dropout, it will be very beneficial to me and the whole research.

In case any other treatment needed, I will call for a doctor's opinion in advance or tell the doctor truthfully afterwards

I give permission for pharmaceutical supervisory and administrative departments, the ethical committee and the project funding department to have access to my research materials.

I will receive a copy of the signed and dated written informed consent form.

Finally, I agree to participate in the study and try to conform to the advice of the doctors as far as possible.

Subjects Signature: \_\_\_\_\_ Date: \_\_\_\_\_

Subjects Tel.: \_\_\_\_\_

---

I confirmed that the entire protocol of this study was explained to all subjects, including their rights, risks and benefits, and were given a signed copy of the informed consent form.

Investigator Signature: \_\_\_\_\_ Date: \_\_\_\_\_

Investigator Tel.: \_\_\_\_\_

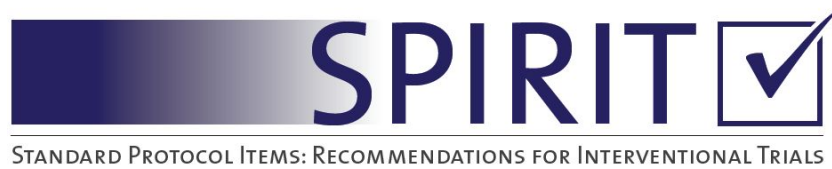

SPIRIT 2013 Checklist: Recommended items to address in a clinical trial protocol and related documents\*

| Section/item                      | Item No | Description                                                                                                  | Page and Line Number | Reason if not applicable |
|-----------------------------------|---------|--------------------------------------------------------------------------------------------------------------|----------------------|--------------------------|
| <b>Administrative information</b> |         |                                                                                                              |                      |                          |
| Title                             | 1       | Descriptive title identifying the study design, population, interventions, and, if applicable, trial acronym | Page1 Line1          |                          |
| Trial registration                | 2a      | Trial identifier and registry name. If not yet registered, name of intended registry                         | Page1 Line35         |                          |
|                                   | 2b      | All items from the World Health Organization Trial Registration Data Set                                     | Page1 Line35         |                          |
| Protocol version                  | 3       | Date and version identifier                                                                                  | Page1 Line36         |                          |
| Funding                           | 4       | Sources and types of financial, material, and other support                                                  | Page15 Line27        |                          |
| Roles and responsibilities        | 5a      | Names, affiliations, and roles of protocol contributors                                                      | Page15 Line18        |                          |
|                                   | 5b      | Name and contact information for the trial sponsor                                                           | Page1 Line10         |                          |

|    |                          |    |                                                                                                                                                                                                                                                                                          |                                                                                                                                                                                       |
|----|--------------------------|----|------------------------------------------------------------------------------------------------------------------------------------------------------------------------------------------------------------------------------------------------------------------------------------------|---------------------------------------------------------------------------------------------------------------------------------------------------------------------------------------|
| 1  |                          |    |                                                                                                                                                                                                                                                                                          |                                                                                                                                                                                       |
| 2  |                          | 5c | Role of study sponsor and funders, if any, in study design; collection, management, analysis, and interpretation of data; writing of the report; and the decision to submit the report for publication, including whether they will have ultimate authority over any of these activities | n/a This funding source had no role in the design of this study and will not have any role during its execution, analyses, interpretation of the data, or decision to submit results. |
| 3  |                          |    |                                                                                                                                                                                                                                                                                          |                                                                                                                                                                                       |
| 4  |                          |    |                                                                                                                                                                                                                                                                                          |                                                                                                                                                                                       |
| 5  |                          |    |                                                                                                                                                                                                                                                                                          |                                                                                                                                                                                       |
| 6  |                          |    |                                                                                                                                                                                                                                                                                          |                                                                                                                                                                                       |
| 7  |                          |    |                                                                                                                                                                                                                                                                                          |                                                                                                                                                                                       |
| 8  |                          |    |                                                                                                                                                                                                                                                                                          |                                                                                                                                                                                       |
| 9  |                          |    |                                                                                                                                                                                                                                                                                          |                                                                                                                                                                                       |
| 10 |                          |    |                                                                                                                                                                                                                                                                                          |                                                                                                                                                                                       |
| 11 |                          |    |                                                                                                                                                                                                                                                                                          |                                                                                                                                                                                       |
| 12 |                          |    |                                                                                                                                                                                                                                                                                          |                                                                                                                                                                                       |
| 13 |                          |    |                                                                                                                                                                                                                                                                                          |                                                                                                                                                                                       |
| 14 |                          |    |                                                                                                                                                                                                                                                                                          |                                                                                                                                                                                       |
| 15 |                          |    |                                                                                                                                                                                                                                                                                          |                                                                                                                                                                                       |
| 16 |                          | 5d | Composition, roles, and responsibilities of the coordinating centre, steering committee, endpoint adjudication committee, data management team, and other individuals or groups overseeing the trial, if applicable (see Item 21a for data monitoring committee)                         | n/a Coordinating centre, steering committee, endpoint adjudication committee, data management team will not have any role in this protocol.                                           |
| 17 |                          |    |                                                                                                                                                                                                                                                                                          |                                                                                                                                                                                       |
| 18 |                          |    |                                                                                                                                                                                                                                                                                          |                                                                                                                                                                                       |
| 19 |                          |    |                                                                                                                                                                                                                                                                                          |                                                                                                                                                                                       |
| 20 |                          |    |                                                                                                                                                                                                                                                                                          |                                                                                                                                                                                       |
| 21 |                          |    |                                                                                                                                                                                                                                                                                          |                                                                                                                                                                                       |
| 22 |                          |    |                                                                                                                                                                                                                                                                                          |                                                                                                                                                                                       |
| 23 |                          |    |                                                                                                                                                                                                                                                                                          |                                                                                                                                                                                       |
| 24 |                          |    |                                                                                                                                                                                                                                                                                          |                                                                                                                                                                                       |
| 25 |                          |    |                                                                                                                                                                                                                                                                                          |                                                                                                                                                                                       |
| 26 |                          |    |                                                                                                                                                                                                                                                                                          |                                                                                                                                                                                       |
| 27 |                          |    |                                                                                                                                                                                                                                                                                          |                                                                                                                                                                                       |
| 28 |                          |    |                                                                                                                                                                                                                                                                                          |                                                                                                                                                                                       |
| 29 |                          |    |                                                                                                                                                                                                                                                                                          |                                                                                                                                                                                       |
| 30 |                          |    |                                                                                                                                                                                                                                                                                          |                                                                                                                                                                                       |
| 31 | <b>Introduction</b>      |    |                                                                                                                                                                                                                                                                                          | Page2 Line16                                                                                                                                                                          |
| 32 |                          |    |                                                                                                                                                                                                                                                                                          |                                                                                                                                                                                       |
| 33 | Background and rationale | 6a | Description of research question and justification for undertaking the trial, including summary of relevant studies (published and unpublished) examining benefits and harms for each intervention                                                                                       | Page4 Line19                                                                                                                                                                          |
| 34 |                          |    |                                                                                                                                                                                                                                                                                          |                                                                                                                                                                                       |
| 35 |                          |    |                                                                                                                                                                                                                                                                                          |                                                                                                                                                                                       |
| 36 |                          |    |                                                                                                                                                                                                                                                                                          |                                                                                                                                                                                       |
| 37 |                          |    |                                                                                                                                                                                                                                                                                          |                                                                                                                                                                                       |
| 38 |                          |    |                                                                                                                                                                                                                                                                                          |                                                                                                                                                                                       |
| 39 |                          |    |                                                                                                                                                                                                                                                                                          |                                                                                                                                                                                       |
| 40 |                          |    |                                                                                                                                                                                                                                                                                          |                                                                                                                                                                                       |
| 41 |                          |    |                                                                                                                                                                                                                                                                                          |                                                                                                                                                                                       |
| 42 |                          |    |                                                                                                                                                                                                                                                                                          |                                                                                                                                                                                       |
| 43 |                          |    |                                                                                                                                                                                                                                                                                          |                                                                                                                                                                                       |
| 44 |                          | 6b | Explanation for choice of comparators                                                                                                                                                                                                                                                    | n/a There is not a control group in this study.                                                                                                                                       |
| 45 |                          |    |                                                                                                                                                                                                                                                                                          |                                                                                                                                                                                       |
| 46 |                          |    |                                                                                                                                                                                                                                                                                          |                                                                                                                                                                                       |
| 47 | Objectives               | 7  | Specific objectives or hypotheses                                                                                                                                                                                                                                                        | Page4 Line22                                                                                                                                                                          |
| 48 |                          |    |                                                                                                                                                                                                                                                                                          |                                                                                                                                                                                       |
| 49 |                          |    |                                                                                                                                                                                                                                                                                          |                                                                                                                                                                                       |
| 50 | Trial design             | 8  | Description of trial design including type of trial (eg, parallel group, crossover, factorial, single group), allocation ratio, and framework (eg, superiority, equivalence, noninferiority, exploratory)                                                                                | Page5 Line2                                                                                                                                                                           |
| 51 |                          |    |                                                                                                                                                                                                                                                                                          |                                                                                                                                                                                       |
| 52 |                          |    |                                                                                                                                                                                                                                                                                          |                                                                                                                                                                                       |
| 53 |                          |    |                                                                                                                                                                                                                                                                                          |                                                                                                                                                                                       |
| 54 |                          |    |                                                                                                                                                                                                                                                                                          |                                                                                                                                                                                       |
| 55 |                          |    |                                                                                                                                                                                                                                                                                          |                                                                                                                                                                                       |
| 56 |                          |    |                                                                                                                                                                                                                                                                                          |                                                                                                                                                                                       |
| 57 |                          |    |                                                                                                                                                                                                                                                                                          |                                                                                                                                                                                       |
| 58 |                          |    |                                                                                                                                                                                                                                                                                          |                                                                                                                                                                                       |
| 59 |                          |    |                                                                                                                                                                                                                                                                                          |                                                                                                                                                                                       |
| 60 |                          |    |                                                                                                                                                                                                                                                                                          |                                                                                                                                                                                       |



1  
2 **Methods: Participants, interventions, and**  
3 **outcomes**  
4

|    |                      |     |                                                                                                                                                                                                |              |
|----|----------------------|-----|------------------------------------------------------------------------------------------------------------------------------------------------------------------------------------------------|--------------|
| 5  | Study setting        | 9   | Description of study settings (eg, community clinic, academic hospital) and list of countries where data will be collected. Reference to where list of study sites can be obtained             | Page6 Line5  |
| 6  |                      |     |                                                                                                                                                                                                |              |
| 7  |                      |     |                                                                                                                                                                                                |              |
| 8  |                      |     |                                                                                                                                                                                                |              |
| 9  |                      |     |                                                                                                                                                                                                |              |
| 10 |                      |     |                                                                                                                                                                                                |              |
| 11 |                      |     |                                                                                                                                                                                                |              |
| 12 |                      |     |                                                                                                                                                                                                |              |
| 13 |                      |     |                                                                                                                                                                                                |              |
| 14 | Eligibility criteria | 10  | Inclusion and exclusion criteria for participants. If applicable, eligibility criteria for study centres and individuals who will perform the interventions (eg, surgeons, psychotherapists)   | Page7 Line6  |
| 15 |                      |     |                                                                                                                                                                                                |              |
| 16 |                      |     |                                                                                                                                                                                                |              |
| 17 |                      |     |                                                                                                                                                                                                |              |
| 18 |                      |     |                                                                                                                                                                                                |              |
| 19 |                      |     |                                                                                                                                                                                                |              |
| 20 |                      |     |                                                                                                                                                                                                |              |
| 21 |                      |     |                                                                                                                                                                                                |              |
| 22 |                      |     |                                                                                                                                                                                                |              |
| 23 |                      |     |                                                                                                                                                                                                |              |
| 24 |                      |     |                                                                                                                                                                                                |              |
| 25 | Interventions        | 11a | Interventions for each group with sufficient detail to allow replication, including how and when they will be administered                                                                     | Page6 Line15 |
| 26 |                      |     |                                                                                                                                                                                                |              |
| 27 |                      |     |                                                                                                                                                                                                |              |
| 28 |                      |     |                                                                                                                                                                                                |              |
| 29 |                      |     |                                                                                                                                                                                                |              |
| 30 |                      |     |                                                                                                                                                                                                |              |
| 31 |                      |     |                                                                                                                                                                                                |              |
| 32 |                      | 11b | Criteria for discontinuing or modifying allocated interventions for a given trial participant (eg, drug dose change in response to harms, participant request, or improving/worsening disease) | Page9 Line10 |
| 33 |                      |     |                                                                                                                                                                                                |              |
| 34 |                      |     |                                                                                                                                                                                                |              |
| 35 |                      |     |                                                                                                                                                                                                |              |
| 36 |                      |     |                                                                                                                                                                                                |              |
| 37 |                      |     |                                                                                                                                                                                                |              |
| 38 |                      |     |                                                                                                                                                                                                |              |
| 39 |                      |     |                                                                                                                                                                                                |              |
| 40 |                      |     |                                                                                                                                                                                                |              |
| 41 |                      |     |                                                                                                                                                                                                |              |
| 42 |                      |     |                                                                                                                                                                                                |              |
| 43 |                      | 11c | Strategies to improve adherence to intervention protocols, and any procedures for monitoring adherence (eg, drug tablet return, laboratory tests)                                              | Page9 Line17 |
| 44 |                      |     |                                                                                                                                                                                                |              |
| 45 |                      |     |                                                                                                                                                                                                |              |
| 46 |                      |     |                                                                                                                                                                                                |              |
| 47 |                      |     |                                                                                                                                                                                                |              |
| 48 |                      |     |                                                                                                                                                                                                |              |
| 49 |                      |     |                                                                                                                                                                                                |              |
| 50 |                      |     |                                                                                                                                                                                                |              |
| 51 |                      | 11d | Relevant concomitant care and interventions that are permitted or prohibited during the trial                                                                                                  | Page9 Line4  |
| 52 |                      |     |                                                                                                                                                                                                |              |
| 53 |                      |     |                                                                                                                                                                                                |              |
| 54 |                      |     |                                                                                                                                                                                                |              |
| 55 |                      |     |                                                                                                                                                                                                |              |
| 56 |                      |     |                                                                                                                                                                                                |              |
| 57 |                      |     |                                                                                                                                                                                                |              |
| 58 |                      |     |                                                                                                                                                                                                |              |
| 59 |                      |     |                                                                                                                                                                                                |              |
| 60 |                      |     |                                                                                                                                                                                                |              |

|    |                      |    |                                                                                                                                                                                                                                                                                                                                                                                |              |
|----|----------------------|----|--------------------------------------------------------------------------------------------------------------------------------------------------------------------------------------------------------------------------------------------------------------------------------------------------------------------------------------------------------------------------------|--------------|
| 1  |                      |    |                                                                                                                                                                                                                                                                                                                                                                                |              |
| 2  | Outcomes             | 12 | Primary, secondary, and other outcomes, including the specific measurement variable (eg, systolic blood pressure), analysis metric (eg, change from baseline, final value, time to event), method of aggregation (eg, median, proportion), and time point for each outcome. Explanation of the clinical relevance of chosen efficacy and harm outcomes is strongly recommended | Page9 Line21 |
| 3  |                      |    |                                                                                                                                                                                                                                                                                                                                                                                |              |
| 4  |                      |    |                                                                                                                                                                                                                                                                                                                                                                                |              |
| 5  |                      |    |                                                                                                                                                                                                                                                                                                                                                                                |              |
| 6  |                      |    |                                                                                                                                                                                                                                                                                                                                                                                |              |
| 7  |                      |    |                                                                                                                                                                                                                                                                                                                                                                                |              |
| 8  |                      |    |                                                                                                                                                                                                                                                                                                                                                                                |              |
| 9  |                      |    |                                                                                                                                                                                                                                                                                                                                                                                |              |
| 10 |                      |    |                                                                                                                                                                                                                                                                                                                                                                                |              |
| 11 |                      |    |                                                                                                                                                                                                                                                                                                                                                                                |              |
| 12 |                      |    |                                                                                                                                                                                                                                                                                                                                                                                |              |
| 13 |                      |    |                                                                                                                                                                                                                                                                                                                                                                                |              |
| 14 |                      |    |                                                                                                                                                                                                                                                                                                                                                                                |              |
| 15 |                      |    |                                                                                                                                                                                                                                                                                                                                                                                |              |
| 16 |                      |    |                                                                                                                                                                                                                                                                                                                                                                                |              |
| 17 |                      |    |                                                                                                                                                                                                                                                                                                                                                                                |              |
| 18 |                      |    |                                                                                                                                                                                                                                                                                                                                                                                |              |
| 19 |                      |    |                                                                                                                                                                                                                                                                                                                                                                                |              |
| 20 |                      |    |                                                                                                                                                                                                                                                                                                                                                                                |              |
| 21 | Participant timeline | 13 | Time schedule of enrolment, interventions (including any run-ins and washouts), assessments, and visits for participants. A schematic diagram is highly recommended (see Figure)                                                                                                                                                                                               | see Figure1  |
| 22 |                      |    |                                                                                                                                                                                                                                                                                                                                                                                |              |
| 23 |                      |    |                                                                                                                                                                                                                                                                                                                                                                                |              |
| 24 |                      |    |                                                                                                                                                                                                                                                                                                                                                                                |              |
| 25 |                      |    |                                                                                                                                                                                                                                                                                                                                                                                |              |
| 26 |                      |    |                                                                                                                                                                                                                                                                                                                                                                                |              |
| 27 |                      |    |                                                                                                                                                                                                                                                                                                                                                                                |              |
| 28 |                      |    |                                                                                                                                                                                                                                                                                                                                                                                |              |
| 29 |                      |    |                                                                                                                                                                                                                                                                                                                                                                                |              |
| 30 |                      |    |                                                                                                                                                                                                                                                                                                                                                                                |              |
| 31 | Sample size          | 14 | Estimated number of participants needed to achieve study objectives and how it was determined, including clinical and statistical assumptions supporting any sample size calculations                                                                                                                                                                                          | Page7 Line26 |
| 32 |                      |    |                                                                                                                                                                                                                                                                                                                                                                                |              |
| 33 |                      |    |                                                                                                                                                                                                                                                                                                                                                                                |              |
| 34 |                      |    |                                                                                                                                                                                                                                                                                                                                                                                |              |
| 35 |                      |    |                                                                                                                                                                                                                                                                                                                                                                                |              |
| 36 |                      |    |                                                                                                                                                                                                                                                                                                                                                                                |              |
| 37 |                      |    |                                                                                                                                                                                                                                                                                                                                                                                |              |
| 38 |                      |    |                                                                                                                                                                                                                                                                                                                                                                                |              |
| 39 |                      |    |                                                                                                                                                                                                                                                                                                                                                                                |              |
| 40 |                      |    |                                                                                                                                                                                                                                                                                                                                                                                |              |
| 41 | Recruitment          | 15 | Strategies for achieving adequate participant enrolment to reach target sample size                                                                                                                                                                                                                                                                                            | Page6 Line4  |
| 42 |                      |    |                                                                                                                                                                                                                                                                                                                                                                                |              |
| 43 |                      |    |                                                                                                                                                                                                                                                                                                                                                                                |              |
| 44 |                      |    |                                                                                                                                                                                                                                                                                                                                                                                |              |
| 45 |                      |    |                                                                                                                                                                                                                                                                                                                                                                                |              |
| 46 |                      |    |                                                                                                                                                                                                                                                                                                                                                                                |              |

**Methods: Assignment of interventions (for controlled trials)**

Allocation:

50  
51  
52  
53  
54  
55  
56  
57  
58  
59  
60

1  
2 Sequence 16a Method of generating the Page6 Line11  
3 generation allocation sequence (eg,  
4 computer-generated  
5 random numbers), and list  
6 of any factors for  
7 stratification. To reduce  
8 predictability of a random  
9 sequence, details of any  
10 planned restriction (eg,  
11 blocking) should be  
12 provided in a separate  
13 document that is  
14 unavailable to those who  
15 enrol participants or assign  
16 interventions  
17  
18  
19  
20

21 Allocation 16b Mechanism of implementing Page6 Line12  
22 concealme the allocation sequence  
23 nt (eg, central telephone;  
24 mechanism sequentially numbered,  
25 opaque, sealed envelopes),  
26 describing any steps to  
27 conceal the sequence until  
28 interventions are assigned  
29  
30  
31

32 Implement 16c Who will generate the Page6 Line13  
33 ation allocation sequence, who  
34 will enrol participants, and  
35 who will assign participants  
36 to interventions  
37  
38

39 Blinding 17a Who will be blinded after Page7 Line3  
40 (masking) assignment to interventions  
41 (eg, trial participants, care  
42 providers, outcome  
43 assessors, data analysts),  
44 and how  
45

46  
47 17b If blinded, circumstances n/a Blinding method will  
48 under which unblinding is not be used in this study.  
49 permissible, and procedure  
50 for revealing a participant's  
51 allocated intervention  
52 during the trial  
53  
54

55 **Methods: Data collection, management, and**  
56 **analysis**  
57  
58  
59  
60

|    |             |     |                              |               |
|----|-------------|-----|------------------------------|---------------|
| 1  |             |     |                              |               |
| 2  | Data        | 18a | Plans for assessment and     | Page10 Line14 |
| 3  | collection  |     | collection of outcome,       |               |
| 4  | methods     |     | baseline, and other trial    |               |
| 5  |             |     | data, including any related  |               |
| 6  |             |     | processes to promote data    |               |
| 7  |             |     | quality (eg, duplicate       |               |
| 8  |             |     | measurements, training of    |               |
| 9  |             |     | assessors) and a             |               |
| 10 |             |     | description of study         |               |
| 11 |             |     | instruments (eg,             |               |
| 12 |             |     | questionnaires, laboratory   |               |
| 13 |             |     | tests) along with their      |               |
| 14 |             |     | reliability and validity, if |               |
| 15 |             |     | known. Reference to where    |               |
| 16 |             |     | data collection forms can    |               |
| 17 |             |     | be found, if not in the      |               |
| 18 |             |     | protocol                     |               |
| 19 |             |     |                              |               |
| 20 |             |     |                              |               |
| 21 |             |     |                              |               |
| 22 |             |     |                              |               |
| 23 |             |     |                              |               |
| 24 |             | 18b | Plans to promote             | Page10 Line17 |
| 25 |             |     | participant retention and    |               |
| 26 |             |     | complete follow-up,          |               |
| 27 |             |     | including list of any        |               |
| 28 |             |     | outcome data to be           |               |
| 29 |             |     | collected for participants   |               |
| 30 |             |     | who discontinue or deviate   |               |
| 31 |             |     | from intervention protocols  |               |
| 32 |             |     |                              |               |
| 33 |             |     |                              |               |
| 34 | Data        | 19  | Plans for data entry,        | Page10 Line16 |
| 35 | management  |     | coding, security, and        |               |
| 36 |             |     | storage, including any       |               |
| 37 |             |     | related processes to         |               |
| 38 |             |     | promote data quality (eg,    |               |
| 39 |             |     | double data entry; range     |               |
| 40 |             |     | checks for data values).     |               |
| 41 |             |     | Reference to where details   |               |
| 42 |             |     | of data management           |               |
| 43 |             |     | procedures can be found, if  |               |
| 44 |             |     | not in the protocol          |               |
| 45 |             |     |                              |               |
| 46 |             |     |                              |               |
| 47 |             |     |                              |               |
| 48 |             |     |                              |               |
| 49 | Statistical | 20a | Statistical methods for      | Page10 Line20 |
| 50 | methods     |     | analysing primary and        |               |
| 51 |             |     | secondary outcomes.          |               |
| 52 |             |     | Reference to where other     |               |
| 53 |             |     | details of the statistical   |               |
| 54 |             |     | analysis plan can be found,  |               |
| 55 |             |     | if not in the protocol       |               |
| 56 |             |     |                              |               |
| 57 |             |     |                              |               |
| 58 |             |     |                              |               |
| 59 |             |     |                              |               |
| 60 |             |     |                              |               |

1  
2 20b Methods for any additional Page8 Line29  
3 analyses (eg, subgroup and  
4 adjusted analyses)  
5

6 20c Definition of analysis n/a Considering the  
7 population relating to purpose of this study,  
8 protocol non-adherence the data of subjects with  
9 (eg, as randomised complete efficacy data  
10 analysis), and any before and after  
11 statistical methods to treatment will be  
12 handle missing data (eg, included in the statistical  
13 multiple imputation) analysis.  
14  
15  
16

## 17 **Methods: Monitoring**

18  
19 Data 21a Composition of data Page12 Line13  
20 monitoring committee  
21 (DMC); summary of its role  
22 and reporting structure;  
23 statement of whether it is  
24 independent from the  
25 sponsor and competing  
26 interests; and reference to  
27 where further details about  
28 its charter can be found, if  
29 not in the protocol.  
30 Alternatively, an  
31 explanation of why a DMC  
32 is not needed  
33  
34  
35  
36

37 21b Description of any interim Page12 Line17  
38 analyses and stopping  
39 guidelines, including who  
40 will have access to these  
41 interim results and make  
42 the final decision to  
43 terminate the trial  
44  
45

46 Harms 22 Plans for collecting, Page9 Line16  
47 assessing, reporting, and  
48 managing solicited and  
49 spontaneously reported  
50 adverse events and other  
51 unintended effects of trial  
52 interventions or trial  
53 conduct  
54  
55  
56  
57  
58  
59  
60

|    |                                 |     |                                                                                                                                                                                                                                  |                                                                                                                                                 |
|----|---------------------------------|-----|----------------------------------------------------------------------------------------------------------------------------------------------------------------------------------------------------------------------------------|-------------------------------------------------------------------------------------------------------------------------------------------------|
| 1  |                                 |     |                                                                                                                                                                                                                                  |                                                                                                                                                 |
| 2  | Auditing                        | 23  | Frequency and procedures for auditing trial conduct, if any, and whether the process will be independent from investigators and the sponsor                                                                                      | n/a This clinical trial will not include auditing.                                                                                              |
| 3  |                                 |     |                                                                                                                                                                                                                                  |                                                                                                                                                 |
| 4  |                                 |     |                                                                                                                                                                                                                                  |                                                                                                                                                 |
| 5  |                                 |     |                                                                                                                                                                                                                                  |                                                                                                                                                 |
| 6  |                                 |     |                                                                                                                                                                                                                                  |                                                                                                                                                 |
| 7  |                                 |     |                                                                                                                                                                                                                                  |                                                                                                                                                 |
| 8  |                                 |     |                                                                                                                                                                                                                                  |                                                                                                                                                 |
| 9  |                                 |     |                                                                                                                                                                                                                                  |                                                                                                                                                 |
| 10 | <b>Ethics and dissemination</b> |     |                                                                                                                                                                                                                                  |                                                                                                                                                 |
| 11 |                                 |     |                                                                                                                                                                                                                                  |                                                                                                                                                 |
| 12 | Research ethics approval        | 24  | Plans for seeking research ethics committee/institutional review board (REC/IRB) approval                                                                                                                                        | Page14 Line24                                                                                                                                   |
| 13 |                                 |     |                                                                                                                                                                                                                                  |                                                                                                                                                 |
| 14 |                                 |     |                                                                                                                                                                                                                                  |                                                                                                                                                 |
| 15 |                                 |     |                                                                                                                                                                                                                                  |                                                                                                                                                 |
| 16 |                                 |     |                                                                                                                                                                                                                                  |                                                                                                                                                 |
| 17 |                                 |     |                                                                                                                                                                                                                                  |                                                                                                                                                 |
| 18 |                                 |     |                                                                                                                                                                                                                                  |                                                                                                                                                 |
| 19 | Protocol amendments             | 25  | Plans for communicating important protocol modifications (eg, changes to eligibility criteria, outcomes, analyses) to relevant parties (eg, investigators, REC/IRBs, trial participants, trial registries, journals, regulators) | n/a The preliminary experiments of this research group and the similar types of research by others have proved the feasibility of the research. |
| 20 |                                 |     |                                                                                                                                                                                                                                  |                                                                                                                                                 |
| 21 |                                 |     |                                                                                                                                                                                                                                  |                                                                                                                                                 |
| 22 |                                 |     |                                                                                                                                                                                                                                  |                                                                                                                                                 |
| 23 |                                 |     |                                                                                                                                                                                                                                  |                                                                                                                                                 |
| 24 |                                 |     |                                                                                                                                                                                                                                  |                                                                                                                                                 |
| 25 |                                 |     |                                                                                                                                                                                                                                  |                                                                                                                                                 |
| 26 |                                 |     |                                                                                                                                                                                                                                  |                                                                                                                                                 |
| 27 |                                 |     |                                                                                                                                                                                                                                  |                                                                                                                                                 |
| 28 |                                 |     |                                                                                                                                                                                                                                  |                                                                                                                                                 |
| 29 |                                 |     |                                                                                                                                                                                                                                  |                                                                                                                                                 |
| 30 |                                 |     |                                                                                                                                                                                                                                  |                                                                                                                                                 |
| 31 |                                 |     |                                                                                                                                                                                                                                  |                                                                                                                                                 |
| 32 | Consent or assent               | 26a | Who will obtain informed consent or assent from potential trial participants or authorised surrogates, and how (see Item 32)                                                                                                     | Page6 Line10                                                                                                                                    |
| 33 |                                 |     |                                                                                                                                                                                                                                  |                                                                                                                                                 |
| 34 |                                 |     |                                                                                                                                                                                                                                  |                                                                                                                                                 |
| 35 |                                 |     |                                                                                                                                                                                                                                  |                                                                                                                                                 |
| 36 |                                 |     |                                                                                                                                                                                                                                  |                                                                                                                                                 |
| 37 |                                 |     |                                                                                                                                                                                                                                  |                                                                                                                                                 |
| 38 |                                 |     |                                                                                                                                                                                                                                  |                                                                                                                                                 |
| 39 |                                 | 26b | Additional consent provisions for collection and use of participant data and biological specimens in ancillary studies, if applicable                                                                                            | n/a This experiment does not involve biological specimens.                                                                                      |
| 40 |                                 |     |                                                                                                                                                                                                                                  |                                                                                                                                                 |
| 41 |                                 |     |                                                                                                                                                                                                                                  |                                                                                                                                                 |
| 42 |                                 |     |                                                                                                                                                                                                                                  |                                                                                                                                                 |
| 43 |                                 |     |                                                                                                                                                                                                                                  |                                                                                                                                                 |
| 44 |                                 |     |                                                                                                                                                                                                                                  |                                                                                                                                                 |
| 45 |                                 |     |                                                                                                                                                                                                                                  |                                                                                                                                                 |
| 46 |                                 |     |                                                                                                                                                                                                                                  |                                                                                                                                                 |
| 47 | Confidentiality                 | 27  | How personal information about potential and enrolled participants will be collected, shared, and maintained in order to protect confidentiality before, during, and after the trial                                             | Page14 Line21                                                                                                                                   |
| 48 |                                 |     |                                                                                                                                                                                                                                  |                                                                                                                                                 |
| 49 |                                 |     |                                                                                                                                                                                                                                  |                                                                                                                                                 |
| 50 |                                 |     |                                                                                                                                                                                                                                  |                                                                                                                                                 |
| 51 |                                 |     |                                                                                                                                                                                                                                  |                                                                                                                                                 |
| 52 |                                 |     |                                                                                                                                                                                                                                  |                                                                                                                                                 |
| 53 |                                 |     |                                                                                                                                                                                                                                  |                                                                                                                                                 |
| 54 |                                 |     |                                                                                                                                                                                                                                  |                                                                                                                                                 |
| 55 |                                 |     |                                                                                                                                                                                                                                  |                                                                                                                                                 |
| 56 |                                 |     |                                                                                                                                                                                                                                  |                                                                                                                                                 |
| 57 |                                 |     |                                                                                                                                                                                                                                  |                                                                                                                                                 |
| 58 |                                 |     |                                                                                                                                                                                                                                  |                                                                                                                                                 |
| 59 |                                 |     |                                                                                                                                                                                                                                  |                                                                                                                                                 |
| 60 |                                 |     |                                                                                                                                                                                                                                  |                                                                                                                                                 |

|    |                   |     |                                |               |
|----|-------------------|-----|--------------------------------|---------------|
| 1  |                   |     |                                |               |
| 2  | Declaration of    | 28  | Financial and other            | Page16 Line16 |
| 3  | interests         |     | competing interests for        |               |
| 4  |                   |     | principal investigators for    |               |
| 5  |                   |     | the overall trial and each     |               |
| 6  |                   |     | study site                     |               |
| 7  |                   |     |                                |               |
| 8  |                   |     |                                |               |
| 9  | Access to         | 29  | Statement of who will have     | Page14 Line28 |
| 10 | data              |     | access to the final trial      |               |
| 11 |                   |     | dataset, and disclosure of     |               |
| 12 |                   |     | contractual agreements that    |               |
| 13 |                   |     | limit such access for          |               |
| 14 |                   |     | investigators                  |               |
| 15 |                   |     |                                |               |
| 16 |                   |     |                                |               |
| 17 | Ancillary and     | 30  | Provisions, if any, for        | Page9 Line17  |
| 18 | post-trial care   |     | ancillary and post-trial care, |               |
| 19 |                   |     | and for compensation to        |               |
| 20 |                   |     | those who suffer harm from     |               |
| 21 |                   |     | trial participation            |               |
| 22 |                   |     |                                |               |
| 23 |                   |     |                                |               |
| 24 | Dissemination     | 31a | Plans for investigators and    | Page16 Line23 |
| 25 | policy            |     | sponsor to communicate         |               |
| 26 |                   |     | trial results to participants, |               |
| 27 |                   |     | healthcare professionals,      |               |
| 28 |                   |     | the public, and other          |               |
| 29 |                   |     | relevant groups (eg, via       |               |
| 30 |                   |     | publication, reporting in      |               |
| 31 |                   |     | results databases, or other    |               |
| 32 |                   |     | data sharing                   |               |
| 33 |                   |     | arrangements), including       |               |
| 34 |                   |     | any publication restrictions   |               |
| 35 |                   |     |                                |               |
| 36 |                   |     |                                |               |
| 37 |                   |     |                                |               |
| 38 |                   | 31b | Authorship eligibility         | Page16 Line25 |
| 39 |                   |     | guidelines and any             |               |
| 40 |                   |     | intended use of                |               |
| 41 |                   |     | professional writers           |               |
| 42 |                   |     |                                |               |
| 43 |                   |     |                                |               |
| 44 |                   | 31c | Plans, if any, for granting    | Page16 Line23 |
| 45 |                   |     | public access to the full      |               |
| 46 |                   |     | protocol, participant-level    |               |
| 47 |                   |     | dataset, and statistical code  |               |
| 48 |                   |     |                                |               |
| 49 |                   |     |                                |               |
| 50 | <b>Appendices</b> |     |                                |               |
| 51 |                   |     |                                |               |
| 52 | Informed          | 32  | Model consent form and         | See           |
| 53 | consent           |     | other related                  | supplement    |
| 54 | materials         |     | documentation given to         | material      |
| 55 |                   |     | participants and authorised    |               |
| 56 |                   |     | surrogates                     |               |
| 57 |                   |     |                                |               |
| 58 |                   |     |                                |               |
| 59 |                   |     |                                |               |
| 60 |                   |     |                                |               |

|    |            |    |                              |                          |
|----|------------|----|------------------------------|--------------------------|
| 1  |            |    |                              |                          |
| 2  | Biological | 33 | Plans for collection,        | n/a This experiment does |
| 3  | specimens  |    | laboratory evaluation, and   | not involve biological   |
| 4  |            |    | storage of biological        | specimens.               |
| 5  |            |    | specimens for genetic or     |                          |
| 6  |            |    | molecular analysis in the    |                          |
| 7  |            |    | current trial and for future |                          |
| 8  |            |    | use in ancillary studies, if |                          |
| 9  |            |    | applicable                   |                          |
| 10 |            |    |                              |                          |
| 11 |            |    |                              |                          |

---

12 \*It is strongly recommended that this checklist be read in conjunction with the SPIRIT 2013  
13 Explanation & Elaboration for important clarification on the items. Amendments to the  
14 protocol should be tracked and dated. The SPIRIT checklist is copyrighted by the SPIRIT  
15 Group under the Creative Commons "[Attribution-NonCommercial-NoDerivs 3.0 Unported](#)"  
16 license.  
17  
18  
19  
20  
21  
22  
23  
24  
25  
26  
27  
28  
29  
30  
31  
32  
33  
34  
35  
36  
37  
38  
39  
40  
41  
42  
43  
44  
45  
46  
47  
48  
49  
50  
51  
52  
53  
54  
55  
56  
57  
58  
59  
60



# BMJ Open

## Test reliability and comparability of paper and Chinese electronic version of the Western Ontario and McMaster University osteoarthritis index: protocol for a randomized controlled clinical trial

|                                 |                                                                                                                                                                                                                                                                                              |
|---------------------------------|----------------------------------------------------------------------------------------------------------------------------------------------------------------------------------------------------------------------------------------------------------------------------------------------|
| Journal:                        | <i>BMJ Open</i>                                                                                                                                                                                                                                                                              |
| Manuscript ID                   | bmjopen-2022-063576.R2                                                                                                                                                                                                                                                                       |
| Article Type:                   | Protocol                                                                                                                                                                                                                                                                                     |
| Date Submitted by the Author:   | 23-Aug-2022                                                                                                                                                                                                                                                                                  |
| Complete List of Authors:       | Zhang, yujie; Shuguang Hospital<br>Zhao, ye; Shuguang Hospital<br>Liu, kaoqiang; Shuguang Hospital<br>Chai, yongli; Shuguang Hospital<br>Lin, fen; Shanghai Jsre Health Co., Ltd<br>Zhan, Hongsheng; Shuguang Hospital<br>Zheng, Yuxin; Shuguang Hospital<br>Yuan, Weian; Shuguang Hospital, |
| <b>Primary Subject Heading</b>: | Diagnostics                                                                                                                                                                                                                                                                                  |
| Secondary Subject Heading:      | Health services research, Research methods                                                                                                                                                                                                                                                   |
| Keywords:                       | Information technology < BIOTECHNOLOGY & BIOINFORMATICS, Musculoskeletal disorders < ORTHOPAEDIC & TRAUMA SURGERY, PRIMARY CARE                                                                                                                                                              |
|                                 |                                                                                                                                                                                                                                                                                              |

SCHOLARONE™  
Manuscripts

# Test reliability and comparability of paper and Chinese electronic version of the Western Ontario and McMaster University osteoarthritis index: protocol for a randomized controlled clinical trial

Yujie zhang<sup>1</sup> Ye zhao<sup>1</sup> Kaoqiang liu<sup>1</sup> Yongli chai<sup>1</sup> Fen lin<sup>2</sup> Hong Sheng Zhan<sup>1</sup> Yuxin Zheng<sup>1</sup> Wei'an Yuan<sup>1</sup> Yujie zhang, Ye zhao as co-first authors

1. Shuguang Hospital Affiliated to Shanghai University of Traditional Chinese Medicine, Shanghai 201203, China

2. Shanghai Jsure Health Co., Ltd, Shanghai 201215, China

Correspondence should be addressed to Hong Sheng Zhan; 13918449223@139.com, Yuxin Zheng; sg\_zyx1728@126.com, Wei'an Yuan; weian\_1980@163.com

## Abstract

**Introduction:** The Western Ontario and McMaster University osteoarthritis index (WOMAC) is the most commonly used indicator of disease-specific outcome in knee osteoarthritis for its convenience and reliability. It has two formats the paper-based WOMAC (p-WOMAC) and the electronic WOMAC (e-WOMAC). In China, the p-WOMAC has been widely used though e-WOMAC is yet untested. This study aims to test whether e-WOMAC is consistent with the p-WOMAC before and after the intervention.

**Methods and analysis:** A total of 70 patients from Shuguang Hospital Affiliated to Shanghai University of Traditional Chinese Medicine will be randomly assigned in two groups named group A and group B. This study is divided into three stages. In the first stage, patients in group A will be evaluated first by p-WOMAC and then by e-WOMAC. Patients in group B will be evaluated by e-WOMAC and then by p-WOMAC. In the second stage of the study, drug interventions will be implemented. 200mg celecoxib will be administered orally once a day starting from the second day of enrollment for a period of 21 days. In the third stage, post-intervention evaluation will be conducted after administration. Patients in group A will be evaluated first by e-WOMAC and then by p-WOMAC. Patients in group B will be evaluated first by p-WOMAC and then by e-WOMAC. In order to avoid the possible bias because of patients' potential memory, e-WOMAC and p-WOMAC will be taken for each patient at 15 minutes apart. The primary outcome of the study is the mean score difference in WOMAC, and the secondary outcomes are the score differences in WOMAC subscales: pain, stiffness, and physical function.

**Ethics and dissemination:** The protocol has been approved by the Independent Review Board of SGH (approval number: 2020-814-21-01). The results of the trial will be submitted for publication in a peer-reviewed journal.

**Trial registration number:** ChiCTR2100050914

**Protocol version:** 1.0, 20 November 2021

## Strengths and limitations of this study

1  
2  
3  
4 The study approach and design enable a comprehensive analysis of the reliability  
5 and comparability of paper-based and Chinese electronic version of WOMAC in  
6 normal clinical practice in a Chinese population.  
7  
8

9  
10 This study is a randomized, crossover design with intervention that can verify  
11 whether e-WOMAC is the same as p-WOMAC in sensitively reflecting the actual  
12 changes in patients' conditions.  
13  
14

15  
16 In this study, patient satisfaction was added as an outcome to investigate  
17 subjects' propensity for paper-based or Chinese electronic version of WOMAC.  
18  
19

20 As the instruments will be collected using electronic tablets, a certain level of  
21 computer literacy is required, and the study may not be able to include participants who  
22 are not capable of handling the devices.  
23  
24  
25

26 Since the patients with KL classification  $\leq$  grade 3 KOA were included in the  
27 study, the results will not be valid for severe KOA patients.  
28  
29  
30  
31  
32

## 33 **Introduction**

34  
35 Knee osteoarthritis (KOA) is the most common chronic, progressive and  
36 degenerative joint disease in middle and old age. It is characterized by articular cartilage  
37 degeneration, osteosclerosis and hyperplasia.<sup>1</sup> Major clinical manifestations of KOA  
38 include progressive knee joint pain, swelling, stiffness, dysfunction, severe deformation  
39 of joints, and even loss of joint function. KOA can lead to pain and dysfunction of the  
40 lower limb and affect patients' normal life and work.<sup>2</sup>  
41  
42  
43  
44  
45  
46

47 The worldwide prevalence of KOA is increasing, reported to be between 3.8% in  
48 2010, and with an estimated 25,000 people suffer from KOA in 2018.<sup>3 4</sup> There is  
49 radiographic evidence of knee osteoarthritis in up to 14% of asymptomatic uninjured  
50 adults aged <40 years and 43% of the middle-aged population.<sup>5</sup> In China,  
51 approximately 8.1% of Chinese people are affected by KOA.<sup>6</sup> KOA can greatly affect  
52 the patient's health and quality of life. Today, its incidence tends to increase with  
53 the advent of an aging society.<sup>7</sup> With increased focus on health, people are becoming  
54  
55  
56  
57  
58  
59  
60

1  
2  
3  
4 more aware of the need for early diagnosis, timely intervention, minimal damage and  
5 better prognosis. Patient-reported outcomes (PRO) can truly reflect patients' health  
6 status and treatment outcomes, and have played a significant part in the diagnosis and  
7 treatment of chronic progressive diseases. The Western Ontario and McMaster  
8 University osteoarthritis (WOMAC) index invented by Bellamy is a specific PRO scale,  
9 which has high reliability and sensitivity for KOA severity assessment and can  
10 accurately reflect the patient's symptoms and functional limitations, and it is also less  
11 affected by subjective factors of the patients.<sup>8</sup> For those who have mild symptoms of  
12 OA, it shows high reliability and is currently the most widely used tool to assess the  
13 severity level of KOA.<sup>9</sup>

23 Although the paper-based WOMAC has already been accepted and widely used,  
24 there are still several shortcomings, such as difficulties in collecting and analyzing pen  
25 and paper-based data. Especially when it comes to the quality of clinical research,  
26 traditional paper-based data is hard to be accessed retrospectively. In times of  
27 Information Technology and communication technologies, smartphone application  
28 provides the technical basis for online assessment and telemedicine.<sup>10 11 12</sup> Meanwhile,  
29 another method of collecting PRO data or mode of administration (MOA), PRO  
30 collected and recorded using the electronic data capture(EDC) tool came into being and  
31 received increasing attention in recent years. Nowadays, many different forms of  
32 WOMAC on the mobile phone, tablet or pc appear in large numbers, namely electronic  
33 WOMAC (e-WOMAC), which has been favored by researchers and become a very  
34 useful tool for objective assessment of KOA in clinical practice and research  
35 gradually.<sup>13 14</sup>

48 The visual analogue scale (VAS) is used in e-WOMAC for the assessment of  
49 KOA. Pain, stiffness and dysfunction assessment can be completed directly at any time  
50 at home through e-WOMAC application, and then physicians can rapidly  
51 understand the patient's condition and adapt treatment to achieve  
52 personalized healthcare by telemedicine.<sup>15</sup> The main advantages of the e-WOMAC  
53 include high efficiency, lower data collection error rate, faster response and  
54  
55  
56  
57  
58  
59  
60

1  
2  
3  
4 increased response rates.<sup>16 17 18 19</sup> Practically, online medical service is potentially  
5 beneficial for patients with KOA: electronic questionnaire can be completed  
6 almost anytime and anyplace, alleviating the influence of environmental factors. The  
7 online medical models of care also avoid multiple visits to the clinic. Additionally,  
8 paper-less records reduce the waste of resources, which is  
9 beneficial for the environment.  
10  
11  
12  
13  
14

15 Before being put into use, many countries, including the UK, Australia,  
16 Switzerland and Austria, have demonstrated the reliability of the e-WOMAC because  
17 the difference in MOA may induce bias, even when the index is consistent across modes.  
18 R.Theiler argues that English e-WOMAC has similar responsiveness in detecting  
19 clinically meaningful change to the traditional p-WOMAC.<sup>20</sup> HA Bischoff-Ferrari  
20 makes a similar point in his study of consistency between German e-WOMAC with the  
21 original format as well.<sup>21</sup> Similarly, R.Theiler found that the Swiss computerized  
22 WOMAC 3.1 and conventional p-WOMAC are similar in all three subscales.<sup>22</sup> Overall,  
23 these studies illustrate the point that electronic MOA is a promising alternative to the  
24 traditional mode.  
25  
26  
27  
28  
29  
30  
31  
32  
33  
34

35 In China, the existing body of research on the Chinese paper-based WOMAC  
36 numerical rating scale (NRS) 3.1 suggests its psychological robustness in reliability and  
37 validity.<sup>23</sup> The research also shows that compared with the Lysholm score, IKDC  
38 score, HSS score, KSS score and other scales used in the assessment of KOA, Chinese  
39 WOMAC 3.1 is the most suitable assessment scale. However, the Chinese electronic  
40 WOMAC hasn't been put into use, so research to date has not yet determined the  
41 equivalence of Chinese e-WOMAC and the traditional p-WOMAC.  
42  
43  
44  
45  
46  
47  
48  
49

## 50 **Objective**

51  
52 By this research, we aim to evaluate the electronic mode of administration and  
53 provide conclusive evidence for developing patient-centered online health applications.  
54 We hypothesize that the equivalent between two formats of the WOMAC will be  
55 proved, then our study objective is to assess: 1. The comparability of results generated  
56  
57  
58  
59  
60

from these two WOMACs. 2. Subjects' acceptance and satisfaction with the Chinese e-WOMAC index.

## Method

### Study design

This study is a randomized controlled trial (RCT) that aims to evaluate the consistency between the Chinese electronic WOMAC (e-WOMAC) and paper WOMAC (p-WOMAC) evaluations of patients with knee osteoarthritis (KOA). The study schedule of enrollment, interventions and assessments are shown in [Table 1](#). The start and end of the study was planned for September 2021 and December 2023, respectively.

**Table 1** Study schedule of enrolment, interventions and assessments.

| STUDY PERIOD            |                  |                     |                     |
|-------------------------|------------------|---------------------|---------------------|
|                         | Pre-intervention | Intervention period | Close-out           |
| TIMEPOINT               | T <sub>0</sub>   | T <sub>1</sub>      | T <sub>2</sub>      |
|                         | Pre-intervention | Between assessments | One month follow-up |
| <b>ENROLMENT:</b>       |                  |                     |                     |
| Eligibility screen      | √                |                     |                     |
| Informed consent        | √                |                     |                     |
| Allocation              | √                |                     |                     |
| <b>INTERVENTION:</b>    |                  |                     |                     |
| Medical treatment       |                  | √                   |                     |
| P-WOMAC analysis        | √                |                     | √                   |
| E-WOMAC analysis        | √                |                     | √                   |
| <b>ASSESSMENTS:</b>     |                  |                     |                     |
| Demographics            | √                |                     |                     |
| <b>Primary outcomes</b> |                  |                     |                     |

|                           |   |   |
|---------------------------|---|---|
| WOMAC total score         | √ | √ |
| <b>Secondary outcomes</b> |   |   |
| WOMAC pain score          | √ | √ |
| WOMAC stiffness score     | √ | √ |
| WOMAC function score      | √ | √ |

## Recruitment and Randomization

A total of 70 patients with KOA will be recruited from the Orthopedic Clinic of Shuguang Hospital affiliated to SHUTCM. The KOA patient will receive a clinical examination by an orthopedic surgeon. Patients with KOA meeting the inclusion criteria will be given detailed information of this study. The importance of patients' active participation in the study and self-monitoring of the disease will be emphasized to improve their enthusiasm. All participants will be provided with an information sheet and sign the informed consent by a research nurse. After participation acceptance, the patients will be divided into group A and group B by randomly generated computer numbers, with 35 patients in each group. A researcher not involved in patient care will prepare and administer the randomization schedule. Neither the researchers nor the patients will be blinded to the evaluation and treatment assignment.

**Figure.1** provides an overview of the flow of study. The study is divided into three stages. In the first stage (T0), patients in group A will be evaluated first by p-WOMAC and then by e-WOMAC. Patients in group B will be evaluated by e-WOMAC and then by p-WOMAC. In the second stage of the study, drug interventions will be implemented. 200mg celecoxib will be administered orally once a day starting from the second day of enrollment for a period of 21 days. The third stage is the consistency evaluation stage after intervention. The post-intervention evaluation will be conducted after administration on day 21 (T2). Patients in group A will be evaluated first by e-WOMAC and then by paper WOMAC. Patients in group B will be evaluated first by p-WOMAC and then by e-WOMAC. In order to eliminate the possible bias because of patients' potential memory, e-WOMAC and p-WOMAC evaluation will be taken for

1  
2  
3  
4 each patient at 15 minutes apart in the first and third stage. This study has been  
5 registered in Chinese Clinical Trial Registry (ChiCTR2100050914) and will be  
6 conducted in strict accordance with Chinese ethical laws and regulations.  
7  
8  
9

## 10 **Blinding**

11  
12 Because of the nature of the study protocol, the blinding method will not be used  
13 in this study. The data collection and analysis will be carried out by a single researcher  
14 who is not aware of the study grouping and intervention arrangements.  
15  
16  
17  
18  
19

## 20 **Inclusion and exclusion criteria**

21  
22 Inclusion criteria are as follows: (1) patients who meet the KOA diagnostic criteria  
23 of Osteoarthritis Diagnosis and Treatment Guidelines (2018 edition) issued by the Joint  
24 Surgery Group of the Orthopaedic Society of the Chinese Medical Association; (2)  
25 patients aged 40 to 70 years, including 40 and 70 years, male or female; (3) KL  
26 classification  $\leq$  grade 3; (4) patients who have a mobile phone and can use the  
27 application proficiently; (5) patients who understand Chinese language and can  
28 complete the WOMAC independently; (6) patients who have signed the informed  
29 consent.  
30  
31  
32  
33  
34  
35  
36  
37

38 Exclusion criteria are as follows: (1) patients with acute meniscus injury, peripheral  
39 ligament rupture injury, rheumatic arthritis, rheumatoid arthritis, peripheral tumor of  
40 knee joint, tuberculosis, idiopathic osteonecrosis of the knee; (2) patients with serious  
41 cardiovascular, lung, liver, kidney and hematopoietic diseases, hemophilia and other  
42 hemorrhagic diseases, mental illness, pregnancy and lactation; (3) patients who are  
43 allergic or intolerant to trial medication; (4) Patients who had received other treatments  
44 in the last two months has an effect on the study; (5) patients who are deemed unsuitable  
45 for the clinical trial.  
46  
47  
48  
49  
50  
51  
52  
53  
54  
55

## 56 **Sample size calculation**

57  
58 The sample size is calculated based on a small sample pre-test we carried out in  
59  
60



1  
2  
3  
4 the early stage and the sample size calculation method studied by Bellamy et al.<sup>24</sup>. The  
5 differences between e-WOMAC and p-WOMAC scores were expressed as the mean  
6 scores (with standard errors) as 2.95 (5.53). Consequently, with a type I error at 0.05  
7 and type II error at 0.10, considering a 1:1 allocation rate and a drop-out rate of 10%,  
8 the minimum number of participants needed was 35 per group, a total of 70 subjects.  
9  
10  
11  
12

13 The formula for calculating sample size is as follows:

$$n = \frac{(t_{\alpha} + t_{\beta})^2 \sigma^2}{\delta^2}$$

## 14 15 16 17 18 **Instrument**

19  
20 WOMAC is a widely used self-administered evaluation tool, which can be  
21 completed within 5-10 minutes. Research shows that this scale has objective reliability,  
22 effectiveness and sensitivity for evaluation of the knee joint, and it is an evaluation  
23 scale that has been widely used for patients with OA. The WOMAC rating scale  
24 assesses the structure and function of the hip and knee in terms of pain, stiffness, and  
25 joint function. There are 24 items in all covering the basic symptoms and signs of OA,  
26 5 items for the pain part, 2 items for the stiffness part, and 17 items for the joint function  
27 part, among which each item has a scale bar without a scale line, representing the range  
28 of 0-10 points, the starting point on the left side of the scale is 0 point, representing  
29 none, and the end point on the right side is 10 points, representing extreme severity.<sup>25</sup>  
30 The regular paper-based WOMAC requires the patient to fill out based on his or her  
31 symptoms and signs within 48 hours, which is then measured by a physician based on  
32 the location. E-WOMAC, a Chinese-language electronic scale for self-assessment of  
33 patients with KOA, used in the study was developed by Shanghai Jsurre Health Co. The  
34 text portion of e-WOMAC is identical to WOMAC VAS 3.1. For the first time, the  
35 patient needs to scan the QR code and download the Epdata software. After registration  
36 and login, patients can fill in the electronic version of WOMAC (figure.2), swipe the  
37 ruler on the screen according to their symptoms and signs within 48 hours, and submit  
38 after completing the answers. Doctors can directly receive the score data of patients in  
39 the Epdata database (figure.3).  
40  
41  
42  
43  
44  
45  
46  
47  
48  
49  
50  
51  
52  
53  
54  
55  
56  
57  
58  
59  
60

## **Additional Questions**

1  
2  
3  
4 At the end of the study, a simple questionnaire has been designed to investigate  
5 subjects' perceptions of the study and the propensity for the paper-based or electronic  
6 version of WOMAC. The questions will involve the description of the advantages and  
7 disadvantages of two WOMACs.  
8  
9  
10

## 11 12 13 **Interventions**

14  
15  
16 Other medications and treatments for KOA, including oral medications, topical  
17 plasters, acupuncture, acupotomy, and arthroscopy will not be available during the  
18 study period. If the patient needs additional treatment, they need to contact the doctor  
19 in advance. To increase the participation of the patients, we make sure all the treatment  
20 of the subjects during the study is free of charge, and the subjects in the trial can have  
21 X-ray and MRI images free of charge and receive appropriate transportation subsidy.  
22 During the intervention, taking celecoxib has a very small probability of certain  
23 digestive tract symptoms, such as vomiting and constipation. The investigator will  
24 make every effort to prevent and treat any harm that may result from this study. If  
25 adverse events occur in the clinical trial, a committee of medical experts will determine  
26 whether it is associated with the treatment. The sponsor will provide the cost of  
27 treatment and the corresponding financial compensation for the damage related to the  
28 trial in accordance with the Provisions of China's "Standard of Quality Management of  
29 Clinical Trials for Drugs". Moreover, we need them to record their medication-taking  
30 behavior in time so as to improve their adherence to the study, which helps minimize  
31 the error.  
32  
33  
34  
35  
36  
37  
38  
39  
40  
41  
42  
43  
44  
45  
46  
47  
48  
49

## 50 **Primary outcomes**

51 The primary outcome of the current study is the mean score difference in  
52 WOMAC. This method has been found to be a semi-quantitative rating scale with better  
53 reliability and validity and more balanced empirical evidence.<sup>18</sup> The Chinese e-  
54 WOMAC, which contains 24 different items split up into 3 subscales: pain subscale (5  
55 items), stiffness subscale (2 items), and physical function subscale (17 items) will be  
56  
57  
58  
59  
60

1  
2  
3  
4 asked to patients. Primary outcomes will be analyzed and reported in two ways. First,  
5 we will compare the difference in the respective score of e-WOMAC and p-WOMAC  
6 before and after the intervention. Then, we will investigate patients' acceptance of two  
7 forms of the WOMAC through a simple self-made questionnaire.  
8  
9  
10

## 11 12 13 **Secondary outcomes**

14  
15  
16 Additionally, the secondary outcomes include the WOMAC VAS 3.1 Pain Scale  
17 (ranging from 0 (no pain during movement) to 500 (extreme pain during movement)),  
18 the WOMAC Stiffness Scale (ranging from 0 to 200 with higher scores meaning more  
19 severe limitation) and the WOMAC Physical Function Scale (ranging from 0 to 1700,  
20 with higher scores indicating more serious impairment during activities). The  
21 secondary outcome analyses will be assessed similarly to the main endpoint analyses.  
22  
23  
24  
25  
26  
27  
28  
29

## 30 **Data collection and management**

31  
32 We will gather information at every stage of recruitment, randomization and  
33 treatment so that we can report flow of patients according to the CONSORT guidelines.  
34 Once a subject is enrolled or randomized, the study site will make every reasonable  
35 effort to follow the subject for the entire study period. Considering the purpose of this  
36 study, the data of subjects with complete efficacy data before and after treatment will  
37 be included in the statistical analysis.  
38  
39  
40  
41  
42  
43

44 The paper questionnaire will be completed by subjects alone, and data will be  
45 collected by trained investigators, then reach the database. The electronic questionnaire  
46 will be completed by subjects alone via the smartphone application. The score of e-  
47 WOMAC will be entered into an excel file and then analyzed by SPSS. Note that time  
48 intervals between two assessments should be 15 minutes in order to eliminate the  
49 influence of memory and maintain data quality and objectivity.  
50  
51  
52  
53  
54  
55  
56  
57

## 58 **Statistical analysis**

59  
60 The aim of the study is to describe a randomized trial designed to test the

effectiveness and reliability of mobile phone application for the assessment of KOA compared with the traditional mode of pen and paper-based, episodic, onsite evaluation. As the average scores of the two versions of the outcome measures are the same, there may also be significant differences in the scores of individual respondents, and/or differences on certain items. The total score and each dimension of e-WOMAC and p-WOMAC will be separately analyzed. All data analysis will be performed by SPSS17.0 statistics software, mean  $\pm$  standard deviation (SD) is used to describe the metrological data following the normal distribution, while median (M) and interquartile range (Q) are used to describe the data not following the normal distribution.

First, two conditions will be compared at baseline with a between-group analysis via a t-test in order to ensure there is no difference between randomization groups. To test our hypothesis, in the first stage calculate the difference scores of each participant (difference  $d = \text{paper WOMAC score} - \text{electronic WOMAC score}$ ) and the data will be analyzed for normality by the Shapiro-Wilks test. For the primary outcomes, we will use the total WOMAC score directly, while for the secondary outcomes, WOMAC subscale scores will be rescaled to a 0-100 scale before calculation. A paired t-test will be used to calculate the mean score difference if data is normally distributed, and the results will be reported as 95% confidence intervals between differences in means; if not, Wilcoxon rank-sum test will be used. Two-factor ANOVA model will be used to account for any differences due to the order of completing the paper and electronic WOMAC index. In the third stage, statistical analysis will be performed after the intervention the same as in the first stage in order to investigate whether the WOMAC score of both high and low levels of KOA has good consistency.

To test the consistency of two versions of the WOMAC, an allowed range is defined (i.e., a value for the mean difference that needed to be exceeded to determine that the two WOMACs are not equivalent). As there is great inter-individual variability between different patients, a limit of equivalence will be determined based on the outcome measure of the pre-experiment to provide a strict test of the equivalence of

1  
2  
3  
4 two WOMACs. If the mean (and its 95% confidence interval) of the difference falls  
5 within the allowable ranges, then we can gain credible evidence of the equivalence of  
6 the scoring system of the WOMAC.  
7  
8

9  
10 Answers to open-ended questions will be subjected to a simple content analysis,  
11 categorized as positive, negative, or neutral comments on the e-WOMAC or p-  
12 WOMAC.  
13  
14

15 For the condition of shedding samples that may occur in the current study, we will  
16 have strict criterion and the statistical analysis will only include patients who participate  
17 in the whole process of the study from enrollment to post-intervention assessment.  
18  
19  
20  
21  
22

### 23 **Data monitoring**

24  
25 An external data monitoring committee was not deemed to be necessary for this  
26 trial. Data will be monitored by the research team, which includes clinicians,  
27 statisticians and information technology experts. This study is considered to be a low-  
28 risk trial where both the intervention and control groups will receive their usual medical  
29 care. The expected duration of the trial lasts only 1 month and the use of the application  
30 does not present with high risk, there won't be any stopping guidelines to terminate the  
31 trial or interim analysis planned.  
32  
33  
34  
35  
36  
37  
38  
39

### 40 **Patient and public involvement**

41  
42 This research is planned to be done without patient involvement. The patients will  
43 not be invited to comment on the study design or be consulted on developing patient-  
44 relevant outcomes. The future manuscript will not be edited by patients for readability  
45 or accuracy.  
46  
47  
48  
49

### 50 **Discussion**

51  
52 Since KOA is characterized by chronic progressive degeneration of articular  
53 cartilage, its assessment involves a complex process and requires an overall evaluation  
54 of the patient's condition for a better clinical outcome. However, today in China, many  
55 residents don't have access to family doctors, so they usually need to go to hospital for  
56 treatment. The inconvenience of visiting doctors may cause delay in treatment.  
57  
58  
59  
60

1  
2  
3  
4 Smartphone application for electronic data capture appears to be an innovative and  
5 promising alternative to the original assessment methods, as smartphone application  
6 have already been proved to be accurate tools.  
7  
8

9  
10 However, it would be unwise to consider transforming a traditional paper-based  
11 patient-reported outcomes measure to an electronic version for use in clinical practice  
12 and research if the equivalence of the two versions hasn't been proved. In this study  
13 protocol, we describe an unblinded trial designed to test a newly developed technology-  
14 based KOA assessment consisting of a mobile phone application for patients, which is  
15 linked to the physicians. Specifically, we want to explore the reliability and  
16 comparability of electronic and paper versions of the WOMAC and whether electronic  
17 MOA can help improve treatment adherence by meeting patients' preferences.  
18  
19  
20  
21  
22  
23  
24

25 To the best of our knowledge, this is the first study to test the reliability of the  
26 Chinese electronic WOMAC for KOA assessment. If our hypothesis is confirmed, the  
27 findings will serve to demonstrate the equivalence of electronic and paper versions of  
28 WOMAC and patients' acceptance of Chinese e-WOMAC so that it can be  
29 implemented in clinical practice and research. Likewise, our results will further  
30 demonstrate the feasibility of e-health for personalized KOA therapy. (i.e.,  
31 timely adjustment of the treatment plan can be rapidly given to patients based on self-  
32 reported ePRO with the help of a smartphone application)  
33  
34  
35  
36  
37  
38  
39  
40

41 We anticipate that with the support of electronic MOA, physicians will be able to  
42 receive timely feedback on patients' conditions, which will significantly improve the  
43 visiting rate and treatment rate due to the convenience of telemedicine and rapid  
44 response to unwanted events. Note that KOA is a common chronic disease in the elderly,  
45 the study will explore the feasibility of enabling the Chinese e-WOMAC for patients'  
46 long-term use.  
47  
48  
49  
50  
51

52 However, using EDC systems may still have some limitations. The degree  
53 of familiarity with the electronics is not entirely consistent between different  
54 populations, especially considering the factors of age, social status and other general  
55 factors. For example, some patients who don't have communication vehicles or cannot  
56 permit proper use of the application may be excluded from the online medical service.  
57  
58  
59  
60

1  
2  
3  
4 In addition, psychological factors may have a relevant influence on filling  
5 out the questionnaire leading to the condition that patients feel non-adapted, have  
6 difficulty in using the smartphone or even fail to complete the questionnaire.<sup>26</sup>  
7  
8 Accordingly, we can make some necessary adjustments to the application. In sum, the  
9 results of the present investigation may help to find new ways of developing  
10 smartphone applications and information and communication technology in the  
11 medical field. In addition, it will also be more favorable to select the most appropriate  
12 MOA for PROs, including electronic MOA, paper-based MOA or mixed-mode designs.  
13  
14  
15  
16  
17  
18  
19  
20

### 21 **Data management and oversight**

22  
23 In order to ensure protocol compliance, proper study management, and timely  
24 completion of study procedures, members of the research team from Shuguang Hospital  
25 Affiliated to Shanghai University of Traditional Chinese Medicine will take  
26 responsibility for the conduct of all research staff and study participants.  
27  
28  
29  
30  
31  
32

### 33 **Protocol and registration**

34  
35 The trial is registered with the ChiCTR, ChiCTR2100050914. Registered on 8 Sep 2021,  
36 <https://www.chictr.org.cn/showproj.aspx?proj=133521>  
37  
38  
39  
40

### 41 **Data storage security and patient confidentiality**

42  
43 Patient's medical records (descriptive characteristics like name initials, allocated study  
44 number, sex, age, BMI, outcome measures like primary outcomes and secondary  
45 outcomes and laboratory results) will be kept in the respective hospital, and physicians  
46 will document the findings of the study in it, allowing  
47 researchers and ethics committees to access the data. Personal information of patients  
48 will not be revealed in the results of this study, and we will try everything we  
49 can to protect patients' privacy and medical data within Chinese law. According to  
50 medical research ethics, experimental data, especially personal privacy information,  
51 will not be allowed to be accessed and shared by the public and will be limited to web-  
52 based databases to ensure that personal privacy information is not disclosed.  
53  
54  
55  
56  
57  
58  
59  
60



## Ethics and dissemination

The protocol for this trial has been approved by the Independent Review Board of SGH (approval number: 2020-814-21-01). All participants will be required to sign an informed consent form before enrollment in this study. The model consent form and other related documentation given to participants can be provided upon request. (see online supplementary file)

## Abbreviations

KOA: Knee osteoarthritis; WOMAC: Western Ontario and McMaster Universities Arthritis Index; e-WOMAC: electronic version of the WOMAC; p-WOMAC: paper-based WOMAC; e-health: online medical system; PRO: patient-reported outcomes; EDC: electronic data capture; SGH: Shuguang Hospital Affiliated to Shanghai University of Traditional Chinese Medicine.

## Acknowledgements

Acknowledgment is given to Shanghai Jsure Health Co. for its technical support of the application. The authors would also like to thank staff and students at Shuguang Hospital Affiliated to Shanghai University of Traditional Chinese Medicine, for their contributions to the implementation of this study.

## Author information

### Affiliations

**Shuguang Hospital Affiliated to Shanghai University of Traditional Chinese Medicine, Shanghai, China**

Wei'an Yuan, Yuxin Zheng, Hong Sheng Zhan, Yujie zhang, Ye zhao, Kaoqiang liu, Yongli chai

**Shanghai Jsure Health Co., Ltd, Shanghai, China**

Feng lin

## Authors' contributions

YJZ and YZ are the co-first authors. WAY, YXZ and HSZ designed the study. YJZ, YZ, KQL and YLC interpreted data. YJZ was responsible for the writing of report, literature search, and selection of relevant articles. FL was responsible for the technical service of e-WOMAC.

## Funding

This trial was funded by Special project for clinical research of Shanghai Municipal Health Commission (201940063); 2. Special project for biomedical science and technology support of Shanghai "science and technology innovation action plan"



1  
2  
3 (20S21902100); 3. Shanghai Shenkang hospital development center "municipal  
4 hospital hospital enterprise collaborative clinical trial management project"  
5 (20CR4003B); 4. "Xinglin Xinxing" project of Shanghai Municipal Commission of  
6 health and family planning (ZYSNXD011-RC-XLXX-20130049); 5. National Natural  
7 Science Foundation of China (81403414); 6. "Integrated traditional Chinese and  
8 Western Medicine-Chinese patent medicine clinical evaluation platform" (A1-U21-  
9 205-0103). 7. Three-year clinical action plan of Shanghai Shenkang Hospital  
10 Development Center (SHDC2020CR1051B); 8. Shanghai chronic musculoskeletal  
11 disease clinical medical research center (20MC1920600).  
12  
13  
14  
15

### 16 **Disclaimer**

17 The funding organization has not played any role in the design and conduct of the study;  
18 collection, management, analysis, or interpretation of the data; or preparation of the  
19 manuscript.  
20  
21  
22

### 23 **Competing interests**

24 The authors declare that they have no competing interests. This study is the public  
25 welfare, we only entrust Shanghai Jsure Health Co. to provide e-WOMAC software  
26 based on the technical advantages of the company.  
27  
28  
29

### 30 **Patient consent for publication**

31 Not required  
32

### 33 **Availability of data and material**

34 The datasets analyzed during the current study will be available from the corresponding  
35 author on reasonable request.  
36  
37  
38

### 39 **Consent for publication**

40 Not applicable  
41  
42  
43  
44  
45  
46  
47  
48  
49  
50  
51  
52  
53  
54  
55  
56  
57  
58  
59  
60

## References

- 1 Michael JW, Schlüter-Brust KU, Eysel P. The epidemiology, etiology, diagnosis, and treatment of osteoarthritis of the knee [published correction appears in *Dtsch Arztebl Int*. 2010 Apr;107(16):294]. *Dtsch Arztebl Int*. 2010;107(9):152-162.
- 2 Loeser RF, Goldring SR, Scanzello CR, Goldring MB. Osteoarthritis: a disease of the joint as an organ. *Arthritis Rheum*. 2012;64(6):1697-1707.
- 3 Cross M, Smith E, Hoy D, et al. The global burden of hip and knee osteoarthritis: estimates from the global burden of disease 2010 study. *Ann Rheum Dis*. 2014;73(7):1323-1330.
- 4 O'Neill TW, McCabe PS, McBeth J. Update on the epidemiology, risk factors and disease outcomes of osteoarthritis. *Best Pract Res Clin Rheumatol*. 2018;32(2):312-326.
- 5 Culvenor AG, Øiestad BE, Hart HF, Stefanik JJ, Guermazi A, Crossley KM. Prevalence of knee osteoarthritis features on magnetic resonance imaging in asymptomatic uninjured adults: a systematic review and meta-analysis. *Br J Sports Med*. 2019;53(20):1268-1278.
- 6 Tang X, Wang S, Zhan S, Niu J, Tao K, Zhang Y, Lin J. The Prevalence of Symptomatic Knee Osteoarthritis in China: Results From the China Health and Retirement Longitudinal Study. *Arthritis Rheumatol*. 2016 Mar;68(3):648-53.
- 7 Y. H. Lu and X. B. Shi, "Status and progress of epidemiological research on knee osteoarthritis at home and abroad," *Chinese Journal of Orthopedics and Traumatology of Traditional Chinese Medicine*, vol. 20, no. 6, pp. 81-84, 2012, in Chinese.
- 8 Pollard B, Johnston M, Dixon D. Exploring differential item functioning in the Western Ontario and McMaster Universities Osteoarthritis Index (WOMAC). *BMC Musculoskelet Disord*. 2012 Dec 29;13:265.
- 9 Ghomrawi HMK, Mancuso CA, Dunning A, Gonzalez Della Valle A, Alexiades M, Cornell C, Sculco T, Bostrom M, Mayman D, Marx RG, Westrich G, O'Dell M, Mushlin AI. Do Surgeon Expectations Predict Clinically Important Improvements in WOMAC Scores After THA and TKA? *Clin Orthop Relat Res*. 2017 Sep;475(9):2150-2158.
- 10 van Netten JJ, Clark D, Lazzarini PA, Janda M, Reed LF. The validity and reliability of remote diabetic foot ulcer assessment using mobile phone images. *Sci Rep*. 2017 Aug 25;7(1):9480.
- 11 Zhang C, Fan L, Chai Z, Yu C, Song J. Smartphone and medical application use among dentists in China. *BMC Med Inform Decis Mak*. 2020 Sep 7;20(1):213.
- 12 Falter M, Budts W, Goetschalckx K, Cornelissen V, Buys R. Accuracy of Apple Watch Measurements for Heart Rate and Energy Expenditure in Patients With Cardiovascular Disease: Cross-Sectional Study. *JMIR Mhealth Uhealth*. 2019 Mar 19;7(3):e11889.
- 13 Bellamy N, Patel B, Davis T, Dennison S. Electronic data capture using the Womac NRS 3.1 Index (m-Womac): a pilot study of repeated independent remote data capture in OA. *Inflammopharmacology*. 2010;18(3):107-111.
- 14 Bellamy N, Wilson C, Hendrikz J, Patel B, Dennison S. Electronic data capture (EDC) using cellular technology: implications for clinical trials and practice, and preliminary experience with the m-Womac Index in hip and knee OA patients. *Inflammopharmacology*. 2009;17(2):93-99.
- 15 Anderson JG, Wixson RL, Tsai D, Stulberg SD, Chang RW. Functional outcome and patient satisfaction in total knee patients over the age of 75. *J Arthroplasty*. 1996 Oct;11(7):831-40.
- 16 Bishop FL, Lewis G, Harris S, McKay N, Prentice P, Thiel H, Lewith GT. A within-subjects

1  
2  
3  
4  
5 trial to test the equivalence of online and paper outcome measures: the Roland Morris disability  
6 questionnaire. *BMC Musculoskelet Disord*. 2010 Jun 8;11:113.

7 17 Raat H, Mangunkusumo RT, Mohangoo AD, Juniper EF, Van Der Lei J. Internet and written  
8 respiratory questionnaires yield equivalent results for adolescents. *Pediatr Pulmonol*. 2007  
9 Apr;42(4):357-61.

10 18 Leece P, Bhandari M, Sprague S, Swiontkowski MF, Schemitsch EH, Tornetta P, Devereaux PJ,  
11 Guyatt GH. Internet versus mailed questionnaires: a randomized comparison (2). *J Med Internet*  
12 *Res*. 2004 Sep 24;6(3):e30. 2004 Oct 29;6(4):e38. Corrected and republished in: *J Med Internet Res*.  
13 2004 Oct 29;6(4):e39.

14 19 Bälter KA, Bälter O, Fondell E, Lagerros YT. Web-based and mailed questionnaires: a  
15 comparison of response rates and compliance. *Epidemiology*. 2005 Jul;16(4):577-9.

16 20 Theiler R, Bischoff-Ferrari HA, Good M, Bellamy N. Responsiveness of the electronic touch  
17 screen WOMAC 3.1 OA Index in a short term clinical trial with rofecoxib. *Osteoarthritis Cartilage*.  
18 2004 Nov;12(11):912-6.

19 21 Bischoff-Ferrari HA, Vondechend M, Bellamy N, Theiler R. Validation and patient acceptance  
20 of a computer touch screen version of the WOMAC 3.1 osteoarthritis index. *Ann Rheum Dis*. 2005  
21 Jan;64(1):80-4.

22 22 Theiler R, Spielberger J, Bischoff HA, Bellamy N, Huber J, Kroesen S. Clinical evaluation of  
23 the WOMAC 3.0 OA Index in numeric rating scale format using a computerized touch screen  
24 version. *Osteoarthritis Cartilage*. 2002 Jun;10(6):479-81.

25 23 Symonds T, Hughes B, Liao S, Ang Q, Bellamy N. Validation of the Chinese Western Ontario  
26 and McMaster Universities Osteoarthritis Index in Patients From Mainland China With  
27 Osteoarthritis of the Knee. *Arthritis Care Res (Hoboken)*. 2015 Nov;67(11):1553-60.

28 24 Bellamy N, Wilson C, Hendrikz J, et al. Osteoarthritis Index delivered by mobile phone (m-  
29 WOMAC) is valid, reliable, and responsive. *J Clin Epidemiol*. 2011;64(2):182-190.

30 25 Kwon SB, Ku Y, Han HU, Lee MC, Kim HC, Ro DH. A machine learning-based diagnostic  
31 model associated with knee osteoarthritis severity. *Sci Rep*. 2020 Sep 25;10(1):15743.

32 26 Benhamou M, Baron G, Dalichampt M, Boutron I, Alami S, Rannou F, Ravaud P, Poiraudou  
33 S. Development and validation of a questionnaire assessing fears and beliefs of patients with knee  
34 osteoarthritis: the Knee Osteoarthritis Fears and Beliefs Questionnaire (KOFBeQ). *PLoS One*.  
35 2013;8(1):e53886.

## Figure Legend

### Figure1: Flow chart of the study

### Figure2: Examples of the web for the subjects

(a) the Chinese e-WOMAC app interface after login;

(b) location of knee osteoarthritis: The picture shows the assessed joint (‘您不舒服的地方’ means where do you feel uncomfortable? ‘左膝’ means left knee; ‘右膝’ means right knee; ‘双膝’ means both sides of knee);

(c) e-WOMAC assessment of pain intensity: The picture shows a question about the level of the pain up and down the stairs in the WOMAC pain subscale. (‘上楼梯或下楼梯’ means go upstairs and downstairs. Then choose pain level according to your feelings, the right end of the scale bar means extreme pain and the left means no pain.)

**Figure3: Examples of the web for the physician** (a) details and operation of subjects' data; (b) the score of each question; (c) total score as well as pain, stiffness and physical function subscale scores of e-WOMAC.

1  
2  
3  
4  
5  
6  
7  
8  
9  
10  
11  
12  
13  
14  
15  
16  
17  
18  
19  
20  
21  
22  
23  
24  
25  
26  
27  
28  
29  
30  
31  
32  
33  
34  
35  
36  
37  
38  
39  
40  
41  
42  
43  
44  
45  
46



**Fig. 1** Flow chart of the study

ePData

点击按钮进入应用

开始

您的医生已经选择了您的研究关节，如果您确定不了哪一处才是您的研究关节，请在填写本调查表以前询问清楚。

您不舒服的地方？

左膝  右膝  双膝

返回

下一步

请根据您在过去48小时内感觉到的膝关节【疼痛程度】将下方的三角滑块滑到合适的位置。

(2) 上楼梯或下楼梯

无疼痛感 极度疼痛

(a)

(b)

(c)

- 1 首页
- 2 报表
- 3 受试者数据
- 4 管理
- 5 流程
- 6 我注册
- 7
- 8
- 9
- 10
- 11
- 12
- 13
- 14
- 15
- 16
- 17
- 18
- 19
- 20
- 21
- 22
- 23
- 24
- 25
- 26
- 27
- 28
- 29

数据列表 (中心编号:01)

数据列表 受试者列表

日志填写完成开始时间 日志填写完成结束时间 全部状态 全部受试者编号 全部数据

搜索

| 受试者编号  | 日志填写完成时间                        | 日志名称 | 上传时间                            | 最近修改时间                          | 阶段  | 状态 | 操作 |
|--------|---------------------------------|------|---------------------------------|---------------------------------|-----|----|----|
| S01004 | 2021-09-26 17:08:52 (UTC+08:00) | 问卷评估 | 2021-09-26 17:08:52 (UTC+08:00) | 2021-09-26 17:08:52 (UTC+08:00) | 治疗期 | 有效 | 操作 |
| S01004 | 2021-07-21 19:50:58 (UTC+08:00) | 问卷评估 | 2021-07-21 19:50:58 (UTC+08:00) | 2021-07-21 19:50:58 (UTC+08:00) | 治疗期 | 有效 | 操作 |
| S01004 | 2021-07-21 19:48:50 (UTC+08:00) | 问卷评估 | 2021-07-21 19:48:50 (UTC+08:00) | 2021-07-21 19:48:50 (UTC+08:00) | 治疗期 | 有效 | 操作 |
| S01004 | 2021-07-21 19:47:33 (UTC+08:00) | 问卷评估 | 2021-07-21 19:47:33 (UTC+08:00) | 2021-07-21 19:47:33 (UTC+08:00) | 治疗期 | 有效 | 操作 |
| S01004 | 2021-07-21 19:47:04 (UTC+08:00) | 问卷评估 | 2021-07-21 19:47:04 (UTC+08:00) | 2021-07-21 19:47:04 (UTC+08:00) | 治疗期 | 有效 | 操作 |
| S01004 | 2021-07-21 19:46:33 (UTC+08:00) | 问卷评估 | 2021-07-21 19:46:33 (UTC+08:00) | 2021-07-21 19:46:33 (UTC+08:00) | 治疗期 | 有效 | 操作 |
| S01004 | 2021-07-21 19:45:45 (UTC+08:00) | 问卷评估 | 2021-07-21 19:45:45 (UTC+08:00) | 2021-07-21 19:45:45 (UTC+08:00) | 治疗期 | 有效 | 操作 |

(a)

日志详情

受试者编号: S01004

日志名称: 问卷评估

日志填写完成时间: 2021-06-10 20:23:15 (UTC+08:00)

日志上传时间: 2021-06-10 20:23:15 (UTC+08:00)

最近修改时间: 2021-06-10 20:23:15 (UTC+08:00)

阶段: 治疗期

状态: 有效

您不舒服的地方?

左膝:

疼痛程度: (1) 在平坦的路上行走 63;

疼痛程度: (2) 上楼梯或下楼梯 65;

疼痛程度: (3) 晚上,在床上时,就是说打扰您睡觉的疼痛 60;

疼痛程度: (4) 弯腰时 71;

|    |                             |
|----|-----------------------------|
| 23 | 行动障碍的程度: (23) 做繁重的家务活问题 54; |
| 24 | 行动障碍的程度: (24) 做轻松的家务活 48;   |
| 25 | 疼痛评分 294;                   |
| 26 | 僵硬评分 140;                   |
| 27 | 功能评分 1027;                  |
| 28 | womac总评分 1461;              |

(b)

(c)

## Informed Consent•informed consent page

**Dear Sir/Madam :**

You are invited to participate in the study “**Test reliability and comparability of paper and Chinese electronic version of the Western Ontario and McMaster University osteoarthritis index: a randomized controlled clinical trial**”.

Read the instructions on this page carefully which can help you understand the study including the procedure and duration of the study, and the benefits, risks and discomforts that may be brought to you after participating in it and why it was conducted, before you decide whether or not to take part in this research study. Discuss it with friends and relatives if you wish, or please consult your doctor to help you to reach a decision.

### Introduction

#### Background and Study Aims

Knee osteoarthritis (KOA) is the most common chronic, progressive and degenerative joint disease in middle and old age. It is characterized by articular cartilage degeneration, osteosclerosis and hyperplasia. Major clinical manifestations of KOA include progressive knee joint pain, swelling, stiffness, dysfunction, severe deformation of joints, and even loss of joint function. KOA can lead to pain and dysfunction of the lower limb and affect patients' normal life and work. The worldwide prevalence of KOA is increasing, reported to be between 3.8% in 2010, and with an estimated 25,000 people suffer from KOA in 2018. There is radiographic evidence of knee osteoarthritis in up to 14% in asymptomatic uninjured adults aged < 40 years and 43% of middle-aged population. In China, approximately 8.1% of Chinese people are affected by KOA. KOA can greatly affect the patients' health and quality of life. Today, its incidence tends to increase with the advent of an aging society. With increased demand for health, people are becoming more aware of the need for early diagnosis, timely intervention, minimal damage and better prognosis. Patient-reported outcomes (PRO) can truly reflect patients' health status and treatment outcomes, and have played a significant part in diagnosis and treatment for chronic progressive diseases.

By this research, we aim to provide conclusive evidence for developing patient-centered online health application. We hypothesize that the equivalent between two formats of the WOMAC(paper based WOMAC index and electronic WOMAC index) will be proved, then our study objectives is to assess: 1.The comparability of results generated from these two WOMACs. 2.Subjects' acceptance and satisfaction with the Chinese electronic WOMAC index.

This study will be conducted at Shuguang Hospital Affiliated to Shanghai University of Traditional Chinese Medicine (1 clinical research center) in China. A total of 70 patients volunteered to participate in this study. This research project is supported by the Shanghai Municipal Health Commission (Project No. 201940063). The protocol for this trial has been approved by the Independent Review Board of SGH (approval number: 2020-814-21-01) and complies with relevant provisions of Helsinki Declaration on the protection of the rights and interests of subjects.

#### Inclusion and exclusion criteria



### **Inclusion criteria**

① patients who meet the KOA diagnostic criteria of Osteoarthritis Diagnosis and Treatment Guidelines (2018 edition) issued by the Joint Surgery Group of the Orthopaedic Society of the Chinese Medical Association;

② patients aged 40 to 70 years, including 40 and 70 years, male or female;

③ KL classification  $\leq$  grade 3;

④ patients who have a mobile phone and can use the application proficiently;

⑤ patients who understand Chinese language and can complete the WOMAC independently;

⑥ patients who have signed the informed consent;

### **Exclusion criteria**

① patients with acute meniscus injury, peripheral ligament rupture injury, rheumatic arthritis, rheumatoid arthritis, peripheral tumor of knee joint, tuberculosis, idiopathic osteonecrosis of the knee;

② patients with serious cardiovascular, lung, liver, kidney and hematopoietic diseases, hemophilia and other hemorrhagic diseases, mental illness, pregnancy and lactation;

③ patients who are allergic or intolerant to trial medication;

④ Patients who had received other treatments in the last 2 months has an effect on the study;

⑤ patients who are deemed unsuitable for the clinical trial.

### **What do you need to do if you participate in this study?**

1、 If you meet the inclusion criteria and agree to participate, the study will be conducted as follows:

After you have determined that you can participate in this study, you will have a treatment plan developed by your clinician and perfect routine laboratory tests. In the first stage, you will be evaluated by paper version of WOMAC index and electronic version of WOMAC index on day 1, In the second stage, 200mg celecoxib will be administered orally once a day starting from the second day of enrollment for a period of 21 days. In the third stage, you will complete both scales again and the tendency questionnaire, and count changes in the condition in the hospital and during follow-up. In addition to this, you do not need laboratory tests such as blood tests throughout your study. Your research doctor will give you health guidance, and you can always contact your research doctor for any questions you may have related to knee osteoarthritis.

2、 Other things you need to cooperate with:

During the study period, without affecting your health and daily life, please not to use any kind of medication including analgesics that might affect the study outcomes. If you need additional treatment for various reasons, please also provide us with the relevant information.

### **Benefits from participating in the study**

Participating in this clinical study, your condition may improve. You can get more medical advice and guidance related to this disease as you proceed with this trial.

Your participation will also contribute to the research of rehabilitation exercises for knee osteoarthritis, which is of social significance for the treatment of this disease and for other patients with such diseases.

### **Risks from participation in this study**

This study was designed as a interventional study. During the intervention, taking celecoxib has a very small probability of certain digestive tract symptoms, such as vomiting and constipation.

If you experience any discomfort during the study, there is a new change in your condition or any unexpected circumstances, whether or not related to the study, you should promptly notify your doctor, who will judge and give appropriate medical treatment.

During the study period, you need to follow up at the hospital on time and do some tests, which take up some of your time and may cause trouble or inconvenience.

### **Costs and compensation for study participation**

Patients do not need to pay out-of-pocket expenses for the diagnosis and treatment of KOA in clinical trials. Additionally, there will be no financial compensation for the study participation because the examination items in this study are clinical follow-up programs.

If adverse events occur in the clinical trial, a committee of medical experts will determine whether it is associated with the treatment. The sponsor will provide the cost of treatment and the corresponding financial compensation for the damage related to the trial in accordance with the Provisions of China's "Standard of Quality Management of Clinical Trials for Drugs".

The evaluation, diagnosis and treatment required for combined diseases will not be covered free of charge.

### **Is personal information confidential?**

Information about your participation in this study will be recorded in the study medical records/case report form. All the medical record of the original studies including descriptive characteristics like name initials, allocated study number, sex, age, BMI, outcome measures like primary outcomes and secondary outcomes and laboratory results are treated with standard medical confidentiality and confidential to the extent allowed by law.

In the clinical record form, only your name initials and allocated study number will appear. In relevant research summaries, articles, and public journals, only the initials and numbers of your name will appear if necessary.

When necessary, pharmaceutical supervisory and administrative departments, the ethical committee and the project funding department may consult the information of the subjects participating in the study according to regulations. However, they would not use the data of the participants in the study for other purposes or leak it to other groups without permission.

### **How to get more information?**

You can ask any questions about this study at any time.

Your doctor will leave you his/her phone number so that he/she can answer your questions.

If there is any important new information during the course of the study that may affect your willingness to continue with the study, your doctor will notify you in a timely manner.

### **You may voluntarily choose to participate in the study and quit the study halfway**

Whether you participate in this research is entirely voluntary. You are free to refuse to participate in this study or to withdraw at any time without affecting any benefits to which you

1  
2  
3 would otherwise be entitled and be discriminated against or be subject to any reprisal.

4 Your doctor or researcher may suspend your participation in this study at any time for the  
5 best interest of the subject. You may be consulted about your use of the study drug if you quit the  
6 study for any reason.

7  
8 If clinician feel examination is required, you may also be asked for physical examination and  
9 laboratory tests. You may also refuse without discrimination or retaliation for it.

10 If you choose to participate in this study, we expect you to complete the research.

11 If you do not participate in this study, your research physician will provide you with  
12 alternative treatment options, such as other drug or exercise therapies for knee osteoarthritis.  
13  
14

### 15 16 **What should you do at the present time?**

17 It is up to you to decide whether or not to participate in this study. You can discuss with your  
18 family or friends and ask your doctor as many questions as possible until you fully understand the  
19 study before making a decision.  
20  
21

### 22 **Ethics committee**

23 If you have questions or need to ask anyone other than the investigator, please consult the  
24 Ethics Committee of Shanghai Shuguang Hospital.

25 Ethics Committee Office: The second floor of the eastern administration of Shuguang  
26 Hospital  
27

28 Tel.: 20256070  
29  
30

31 Thank you for reading the above material. If you decide to participate in this study, tell your  
32 doctor and he/she will arrange everything for you to do with the study.  
33

34 Please keep this information sheet.  
35  
36  
37  
38  
39  
40  
41  
42  
43  
44  
45  
46  
47  
48  
49  
50  
51  
52  
53  
54  
55  
56  
57  
58  
59  
60

## Informed Consent•consent signature page

Project name: Test reliability and comparability of paper and Chinese electronic version of the Western Ontario and McMaster University osteoarthritis index: a randomized controlled clinical trial

Project source: Shanghai Municipal Health Commission

Project version: V1.0

Project date: January 10, 2019

### Consent statement

I have read the above statements of this study and were given the chance to discuss the study with and ask questions to the investigator. Any questions I had were answered to my full satisfaction.

I am aware of the risks and benefits that may arise from participating in this study. I am aware that participation in the study is on a voluntary basis. I have had enough time to think about my participation in the study, and I understand that:

- I can always ask the doctor for more information.
- I can withdraw from the study at any time without detriment, and medical care and treatment will not be affected.

I was also very much aware that if I tell the doctor about the change in my condition and complete the physical examination and laboratory test particularly for reasons of drug in case of dropout, it will be very beneficial to me and the whole research.

In case any other treatment needed, I will call for a doctor's opinion in advance or tell the doctor truthfully afterwards

I give permission for pharmaceutical supervisory and administrative departments, the ethical committee and the project funding department to have access to my research materials.

I will receive a copy of the signed and dated written informed consent form.

Finally, I agree to participate in the study and try to conform to the advice of the doctors as far as possible.

Subjects Signature: \_\_\_\_\_ Date: \_\_\_\_\_

Subjects Tel.: \_\_\_\_\_

---

I confirmed that the entire protocol of this study was explained to all subjects, including their rights, risks and benefits, and were given a signed copy of the informed consent form.

Investigator Signature: \_\_\_\_\_ Date: \_\_\_\_\_

Investigator Tel.: \_\_\_\_\_

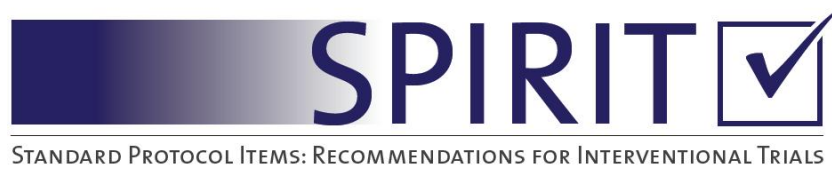

SPIRIT 2013 Checklist: Recommended items to address in a clinical trial protocol and related documents\*

| Section/item                      | Item No | Description                                                                                                  | Page and Line Number | Reason if not applicable |
|-----------------------------------|---------|--------------------------------------------------------------------------------------------------------------|----------------------|--------------------------|
| <b>Administrative information</b> |         |                                                                                                              |                      |                          |
| Title                             | 1       | Descriptive title identifying the study design, population, interventions, and, if applicable, trial acronym | Page1 Line1          |                          |
| Trial registration                | 2a      | Trial identifier and registry name. If not yet registered, name of intended registry                         | Page1 Line35         |                          |
|                                   | 2b      | All items from the World Health Organization Trial Registration Data Set                                     | Page1 Line35         |                          |
| Protocol version                  | 3       | Date and version identifier                                                                                  | Page1 Line36         |                          |
| Funding                           | 4       | Sources and types of financial, material, and other support                                                  | Page15 Line7         |                          |
| Roles and responsibilities        | 5a      | Names, affiliations, and roles of protocol contributors                                                      | Page16 Line1         |                          |
|                                   | 5b      | Name and contact information for the trial sponsor                                                           | Page1 Line11         |                          |

|    |                          |    |                                                                                                                                                                                                                                                                                          |                                                                                                                                                                                       |
|----|--------------------------|----|------------------------------------------------------------------------------------------------------------------------------------------------------------------------------------------------------------------------------------------------------------------------------------------|---------------------------------------------------------------------------------------------------------------------------------------------------------------------------------------|
| 1  |                          |    |                                                                                                                                                                                                                                                                                          |                                                                                                                                                                                       |
| 2  |                          | 5c | Role of study sponsor and funders, if any, in study design; collection, management, analysis, and interpretation of data; writing of the report; and the decision to submit the report for publication, including whether they will have ultimate authority over any of these activities | n/a This funding source had no role in the design of this study and will not have any role during its execution, analyses, interpretation of the data, or decision to submit results. |
| 3  |                          |    |                                                                                                                                                                                                                                                                                          |                                                                                                                                                                                       |
| 4  |                          |    |                                                                                                                                                                                                                                                                                          |                                                                                                                                                                                       |
| 5  |                          |    |                                                                                                                                                                                                                                                                                          |                                                                                                                                                                                       |
| 6  |                          |    |                                                                                                                                                                                                                                                                                          |                                                                                                                                                                                       |
| 7  |                          |    |                                                                                                                                                                                                                                                                                          |                                                                                                                                                                                       |
| 8  |                          |    |                                                                                                                                                                                                                                                                                          |                                                                                                                                                                                       |
| 9  |                          |    |                                                                                                                                                                                                                                                                                          |                                                                                                                                                                                       |
| 10 |                          |    |                                                                                                                                                                                                                                                                                          |                                                                                                                                                                                       |
| 11 |                          |    |                                                                                                                                                                                                                                                                                          |                                                                                                                                                                                       |
| 12 |                          |    |                                                                                                                                                                                                                                                                                          |                                                                                                                                                                                       |
| 13 |                          |    |                                                                                                                                                                                                                                                                                          |                                                                                                                                                                                       |
| 14 |                          |    |                                                                                                                                                                                                                                                                                          |                                                                                                                                                                                       |
| 15 |                          |    |                                                                                                                                                                                                                                                                                          |                                                                                                                                                                                       |
| 16 |                          | 5d | Composition, roles, and responsibilities of the coordinating centre, steering committee, endpoint adjudication committee, data management team, and other individuals or groups overseeing the trial, if applicable (see Item 21a for data monitoring committee)                         | n/a Coordinating centre, steering committee, endpoint adjudication committee, data management team will not have any role in this protocol.                                           |
| 17 |                          |    |                                                                                                                                                                                                                                                                                          |                                                                                                                                                                                       |
| 18 |                          |    |                                                                                                                                                                                                                                                                                          |                                                                                                                                                                                       |
| 19 |                          |    |                                                                                                                                                                                                                                                                                          |                                                                                                                                                                                       |
| 20 |                          |    |                                                                                                                                                                                                                                                                                          |                                                                                                                                                                                       |
| 21 |                          |    |                                                                                                                                                                                                                                                                                          |                                                                                                                                                                                       |
| 22 |                          |    |                                                                                                                                                                                                                                                                                          |                                                                                                                                                                                       |
| 23 |                          |    |                                                                                                                                                                                                                                                                                          |                                                                                                                                                                                       |
| 24 |                          |    |                                                                                                                                                                                                                                                                                          |                                                                                                                                                                                       |
| 25 |                          |    |                                                                                                                                                                                                                                                                                          |                                                                                                                                                                                       |
| 26 |                          |    |                                                                                                                                                                                                                                                                                          |                                                                                                                                                                                       |
| 27 |                          |    |                                                                                                                                                                                                                                                                                          |                                                                                                                                                                                       |
| 28 |                          |    |                                                                                                                                                                                                                                                                                          |                                                                                                                                                                                       |
| 29 |                          |    |                                                                                                                                                                                                                                                                                          |                                                                                                                                                                                       |
| 30 |                          |    |                                                                                                                                                                                                                                                                                          |                                                                                                                                                                                       |
| 31 | <b>Introduction</b>      |    |                                                                                                                                                                                                                                                                                          | Page2 Line16                                                                                                                                                                          |
| 32 |                          |    |                                                                                                                                                                                                                                                                                          |                                                                                                                                                                                       |
| 33 | Background and rationale | 6a | Description of research question and justification for undertaking the trial, including summary of relevant studies (published and unpublished) examining benefits and harms for each intervention                                                                                       | Page4 Line22                                                                                                                                                                          |
| 34 |                          |    |                                                                                                                                                                                                                                                                                          |                                                                                                                                                                                       |
| 35 |                          |    |                                                                                                                                                                                                                                                                                          |                                                                                                                                                                                       |
| 36 |                          |    |                                                                                                                                                                                                                                                                                          |                                                                                                                                                                                       |
| 37 |                          |    |                                                                                                                                                                                                                                                                                          |                                                                                                                                                                                       |
| 38 |                          |    |                                                                                                                                                                                                                                                                                          |                                                                                                                                                                                       |
| 39 |                          |    |                                                                                                                                                                                                                                                                                          |                                                                                                                                                                                       |
| 40 |                          |    |                                                                                                                                                                                                                                                                                          |                                                                                                                                                                                       |
| 41 |                          |    |                                                                                                                                                                                                                                                                                          |                                                                                                                                                                                       |
| 42 |                          |    |                                                                                                                                                                                                                                                                                          |                                                                                                                                                                                       |
| 43 |                          |    |                                                                                                                                                                                                                                                                                          |                                                                                                                                                                                       |
| 44 |                          | 6b | Explanation for choice of comparators                                                                                                                                                                                                                                                    | n/a There is not a control group in this study.                                                                                                                                       |
| 45 |                          |    |                                                                                                                                                                                                                                                                                          |                                                                                                                                                                                       |
| 46 |                          |    |                                                                                                                                                                                                                                                                                          |                                                                                                                                                                                       |
| 47 | Objectives               | 7  | Specific objectives or hypotheses                                                                                                                                                                                                                                                        | Page4 Line23                                                                                                                                                                          |
| 48 |                          |    |                                                                                                                                                                                                                                                                                          |                                                                                                                                                                                       |
| 49 |                          |    |                                                                                                                                                                                                                                                                                          |                                                                                                                                                                                       |
| 50 | Trial design             | 8  | Description of trial design including type of trial (eg, parallel group, crossover, factorial, single group), allocation ratio, and framework (eg, superiority, equivalence, noninferiority, exploratory)                                                                                | Page5 Line5                                                                                                                                                                           |
| 51 |                          |    |                                                                                                                                                                                                                                                                                          |                                                                                                                                                                                       |
| 52 |                          |    |                                                                                                                                                                                                                                                                                          |                                                                                                                                                                                       |
| 53 |                          |    |                                                                                                                                                                                                                                                                                          |                                                                                                                                                                                       |
| 54 |                          |    |                                                                                                                                                                                                                                                                                          |                                                                                                                                                                                       |
| 55 |                          |    |                                                                                                                                                                                                                                                                                          |                                                                                                                                                                                       |
| 56 |                          |    |                                                                                                                                                                                                                                                                                          |                                                                                                                                                                                       |
| 57 |                          |    |                                                                                                                                                                                                                                                                                          |                                                                                                                                                                                       |
| 58 |                          |    |                                                                                                                                                                                                                                                                                          |                                                                                                                                                                                       |
| 59 |                          |    |                                                                                                                                                                                                                                                                                          |                                                                                                                                                                                       |
| 60 |                          |    |                                                                                                                                                                                                                                                                                          |                                                                                                                                                                                       |

1  
2 **Methods: Participants, interventions, and**  
3 **outcomes**  
4

|    |                      |     |                                                                                                                                                                                                |              |
|----|----------------------|-----|------------------------------------------------------------------------------------------------------------------------------------------------------------------------------------------------|--------------|
| 5  | Study setting        | 9   | Description of study settings (eg, community clinic, academic hospital) and list of countries where data will be collected. Reference to where list of study sites can be obtained             | Page6 Line7  |
| 6  |                      |     |                                                                                                                                                                                                |              |
| 7  |                      |     |                                                                                                                                                                                                |              |
| 8  |                      |     |                                                                                                                                                                                                |              |
| 9  |                      |     |                                                                                                                                                                                                |              |
| 10 |                      |     |                                                                                                                                                                                                |              |
| 11 |                      |     |                                                                                                                                                                                                |              |
| 12 |                      |     |                                                                                                                                                                                                |              |
| 13 |                      |     |                                                                                                                                                                                                |              |
| 14 | Eligibility criteria | 10  | Inclusion and exclusion criteria for participants. If applicable, eligibility criteria for study centres and individuals who will perform the interventions (eg, surgeons, psychotherapists)   | Page7 Line10 |
| 15 |                      |     |                                                                                                                                                                                                |              |
| 16 |                      |     |                                                                                                                                                                                                |              |
| 17 |                      |     |                                                                                                                                                                                                |              |
| 18 |                      |     |                                                                                                                                                                                                |              |
| 19 |                      |     |                                                                                                                                                                                                |              |
| 20 |                      |     |                                                                                                                                                                                                |              |
| 21 |                      |     |                                                                                                                                                                                                |              |
| 22 |                      |     |                                                                                                                                                                                                |              |
| 23 |                      |     |                                                                                                                                                                                                |              |
| 24 |                      |     |                                                                                                                                                                                                |              |
| 25 | Interventions        | 11a | Interventions for each group with sufficient detail to allow replication, including how and when they will be administered                                                                     | Page6 Line19 |
| 26 |                      |     |                                                                                                                                                                                                |              |
| 27 |                      |     |                                                                                                                                                                                                |              |
| 28 |                      |     |                                                                                                                                                                                                |              |
| 29 |                      |     |                                                                                                                                                                                                |              |
| 30 |                      |     |                                                                                                                                                                                                |              |
| 31 |                      |     |                                                                                                                                                                                                |              |
| 32 |                      | 11b | Criteria for discontinuing or modifying allocated interventions for a given trial participant (eg, drug dose change in response to harms, participant request, or improving/worsening disease) | Page9 Line18 |
| 33 |                      |     |                                                                                                                                                                                                |              |
| 34 |                      |     |                                                                                                                                                                                                |              |
| 35 |                      |     |                                                                                                                                                                                                |              |
| 36 |                      |     |                                                                                                                                                                                                |              |
| 37 |                      |     |                                                                                                                                                                                                |              |
| 38 |                      |     |                                                                                                                                                                                                |              |
| 39 |                      |     |                                                                                                                                                                                                |              |
| 40 |                      |     |                                                                                                                                                                                                |              |
| 41 |                      |     |                                                                                                                                                                                                |              |
| 42 |                      |     |                                                                                                                                                                                                |              |
| 43 |                      | 11c | Strategies to improve adherence to intervention protocols, and any procedures for monitoring adherence (eg, drug tablet return, laboratory tests)                                              | Page9 Line23 |
| 44 |                      |     |                                                                                                                                                                                                |              |
| 45 |                      |     |                                                                                                                                                                                                |              |
| 46 |                      |     |                                                                                                                                                                                                |              |
| 47 |                      |     |                                                                                                                                                                                                |              |
| 48 |                      |     |                                                                                                                                                                                                |              |
| 49 |                      |     |                                                                                                                                                                                                |              |
| 50 |                      |     |                                                                                                                                                                                                |              |
| 51 |                      | 11d | Relevant concomitant care and interventions that are permitted or prohibited during the trial                                                                                                  | Page9 Line10 |
| 52 |                      |     |                                                                                                                                                                                                |              |
| 53 |                      |     |                                                                                                                                                                                                |              |
| 54 |                      |     |                                                                                                                                                                                                |              |
| 55 |                      |     |                                                                                                                                                                                                |              |
| 56 |                      |     |                                                                                                                                                                                                |              |
| 57 |                      |     |                                                                                                                                                                                                |              |
| 58 |                      |     |                                                                                                                                                                                                |              |
| 59 |                      |     |                                                                                                                                                                                                |              |
| 60 |                      |     |                                                                                                                                                                                                |              |

|    |                      |    |                                                                                                                                                                                                                                                                                                                                                                                |              |
|----|----------------------|----|--------------------------------------------------------------------------------------------------------------------------------------------------------------------------------------------------------------------------------------------------------------------------------------------------------------------------------------------------------------------------------|--------------|
| 1  |                      |    |                                                                                                                                                                                                                                                                                                                                                                                |              |
| 2  | Outcomes             | 12 | Primary, secondary, and other outcomes, including the specific measurement variable (eg, systolic blood pressure), analysis metric (eg, change from baseline, final value, time to event), method of aggregation (eg, median, proportion), and time point for each outcome. Explanation of the clinical relevance of chosen efficacy and harm outcomes is strongly recommended | Page9 Line27 |
| 3  |                      |    |                                                                                                                                                                                                                                                                                                                                                                                |              |
| 4  |                      |    |                                                                                                                                                                                                                                                                                                                                                                                |              |
| 5  |                      |    |                                                                                                                                                                                                                                                                                                                                                                                |              |
| 6  |                      |    |                                                                                                                                                                                                                                                                                                                                                                                |              |
| 7  |                      |    |                                                                                                                                                                                                                                                                                                                                                                                |              |
| 8  |                      |    |                                                                                                                                                                                                                                                                                                                                                                                |              |
| 9  |                      |    |                                                                                                                                                                                                                                                                                                                                                                                |              |
| 10 |                      |    |                                                                                                                                                                                                                                                                                                                                                                                |              |
| 11 |                      |    |                                                                                                                                                                                                                                                                                                                                                                                |              |
| 12 |                      |    |                                                                                                                                                                                                                                                                                                                                                                                |              |
| 13 |                      |    |                                                                                                                                                                                                                                                                                                                                                                                |              |
| 14 |                      |    |                                                                                                                                                                                                                                                                                                                                                                                |              |
| 15 |                      |    |                                                                                                                                                                                                                                                                                                                                                                                |              |
| 16 |                      |    |                                                                                                                                                                                                                                                                                                                                                                                |              |
| 17 |                      |    |                                                                                                                                                                                                                                                                                                                                                                                |              |
| 18 |                      |    |                                                                                                                                                                                                                                                                                                                                                                                |              |
| 19 |                      |    |                                                                                                                                                                                                                                                                                                                                                                                |              |
| 20 |                      |    |                                                                                                                                                                                                                                                                                                                                                                                |              |
| 21 | Participant timeline | 13 | Time schedule of enrolment, interventions (including any run-ins and washouts), assessments, and visits for participants. A schematic diagram is highly recommended (see Figure)                                                                                                                                                                                               | see Figure1  |
| 22 |                      |    |                                                                                                                                                                                                                                                                                                                                                                                |              |
| 23 |                      |    |                                                                                                                                                                                                                                                                                                                                                                                |              |
| 24 |                      |    |                                                                                                                                                                                                                                                                                                                                                                                |              |
| 25 |                      |    |                                                                                                                                                                                                                                                                                                                                                                                |              |
| 26 |                      |    |                                                                                                                                                                                                                                                                                                                                                                                |              |
| 27 |                      |    |                                                                                                                                                                                                                                                                                                                                                                                |              |
| 28 |                      |    |                                                                                                                                                                                                                                                                                                                                                                                |              |
| 29 |                      |    |                                                                                                                                                                                                                                                                                                                                                                                |              |
| 30 |                      |    |                                                                                                                                                                                                                                                                                                                                                                                |              |
| 31 | Sample size          | 14 | Estimated number of participants needed to achieve study objectives and how it was determined, including clinical and statistical assumptions supporting any sample size calculations                                                                                                                                                                                          | Page7 Line28 |
| 32 |                      |    |                                                                                                                                                                                                                                                                                                                                                                                |              |
| 33 |                      |    |                                                                                                                                                                                                                                                                                                                                                                                |              |
| 34 |                      |    |                                                                                                                                                                                                                                                                                                                                                                                |              |
| 35 |                      |    |                                                                                                                                                                                                                                                                                                                                                                                |              |
| 36 |                      |    |                                                                                                                                                                                                                                                                                                                                                                                |              |
| 37 |                      |    |                                                                                                                                                                                                                                                                                                                                                                                |              |
| 38 |                      |    |                                                                                                                                                                                                                                                                                                                                                                                |              |
| 39 |                      |    |                                                                                                                                                                                                                                                                                                                                                                                |              |
| 40 |                      |    |                                                                                                                                                                                                                                                                                                                                                                                |              |
| 41 | Recruitment          | 15 | Strategies for achieving adequate participant enrolment to reach target sample size                                                                                                                                                                                                                                                                                            | Page6 Line10 |
| 42 |                      |    |                                                                                                                                                                                                                                                                                                                                                                                |              |
| 43 |                      |    |                                                                                                                                                                                                                                                                                                                                                                                |              |
| 44 |                      |    |                                                                                                                                                                                                                                                                                                                                                                                |              |
| 45 |                      |    |                                                                                                                                                                                                                                                                                                                                                                                |              |
| 46 |                      |    |                                                                                                                                                                                                                                                                                                                                                                                |              |

**Methods: Assignment of interventions (for controlled trials)**

Allocation:

50  
51  
52  
53  
54  
55  
56  
57  
58  
59  
60



|    |            |     |                               |                            |
|----|------------|-----|-------------------------------|----------------------------|
| 1  |            |     |                               |                            |
| 2  | Sequence   | 16a | Method of generating the      | Page6 Line13               |
| 3  | generation |     | allocation sequence (eg,      |                            |
| 4  |            |     | computer-generated            |                            |
| 5  |            |     | random numbers), and list     |                            |
| 6  |            |     | of any factors for            |                            |
| 7  |            |     | stratification. To reduce     |                            |
| 8  |            |     | predictability of a random    |                            |
| 9  |            |     | sequence, details of any      |                            |
| 10 |            |     | planned restriction (eg,      |                            |
| 11 |            |     | blocking) should be           |                            |
| 12 |            |     | provided in a separate        |                            |
| 13 |            |     | document that is              |                            |
| 14 |            |     | unavailable to those who      |                            |
| 15 |            |     | enrol participants or assign  |                            |
| 16 |            |     | interventions                 |                            |
| 17 |            |     |                               |                            |
| 18 |            |     |                               |                            |
| 19 |            |     |                               |                            |
| 20 |            |     |                               |                            |
| 21 | Allocation | 16b | Mechanism of                  | Page6 Line14               |
| 22 | concealme  |     | implementing the allocation   |                            |
| 23 | nt         |     | sequence (eg, central         |                            |
| 24 | mechanism  |     | telephone; sequentially       |                            |
| 25 |            |     | numbered, opaque, sealed      |                            |
| 26 |            |     | envelopes), describing any    |                            |
| 27 |            |     | steps to conceal the          |                            |
| 28 |            |     | sequence until interventions  |                            |
| 29 |            |     | are assigned                  |                            |
| 30 |            |     |                               |                            |
| 31 |            |     |                               |                            |
| 32 |            |     |                               |                            |
| 33 | Implement  | 16c | Who will generate the         | Page6 Line15               |
| 34 | ation      |     | allocation sequence, who      |                            |
| 35 |            |     | will enrol participants, and  |                            |
| 36 |            |     | who will assign participants  |                            |
| 37 |            |     | to interventions              |                            |
| 38 |            |     |                               |                            |
| 39 |            |     |                               |                            |
| 40 | Blinding   | 17a | Who will be blinded after     | Page7 Line5                |
| 41 | (masking)  |     | assignment to interventions   |                            |
| 42 |            |     | (eg, trial participants, care |                            |
| 43 |            |     | providers, outcome            |                            |
| 44 |            |     | assessors, data analysts),    |                            |
| 45 |            |     | and how                       |                            |
| 46 |            |     |                               |                            |
| 47 |            |     |                               |                            |
| 48 |            | 17b | If blinded, circumstances     | n/a Blinding method will   |
| 49 |            |     | under which unblinding is     | not be used in this study. |
| 50 |            |     | permissible, and procedure    |                            |
| 51 |            |     | for revealing a participant's |                            |
| 52 |            |     | allocated intervention        |                            |
| 53 |            |     | during the trial              |                            |
| 54 |            |     |                               |                            |
| 55 |            |     |                               |                            |

**Methods: Data collection, management, and analysis**

|    |             |     |                              |               |
|----|-------------|-----|------------------------------|---------------|
| 1  |             |     |                              |               |
| 2  | Data        | 18a | Plans for assessment and     | Page10 Line25 |
| 3  | collection  |     | collection of outcome,       |               |
| 4  | methods     |     | baseline, and other trial    |               |
| 5  |             |     | data, including any related  |               |
| 6  |             |     | processes to promote data    |               |
| 7  |             |     | quality (eg, duplicate       |               |
| 8  |             |     | measurements, training of    |               |
| 9  |             |     | assessors) and a             |               |
| 10 |             |     | description of study         |               |
| 11 |             |     | instruments (eg,             |               |
| 12 |             |     | questionnaires, laboratory   |               |
| 13 |             |     | tests) along with their      |               |
| 14 |             |     | reliability and validity, if |               |
| 15 |             |     | known. Reference to where    |               |
| 16 |             |     | data collection forms can    |               |
| 17 |             |     | be found, if not in the      |               |
| 18 |             |     | protocol                     |               |
| 19 |             |     |                              |               |
| 20 |             |     |                              |               |
| 21 |             |     |                              |               |
| 22 |             |     |                              |               |
| 23 |             |     |                              |               |
| 24 |             | 18b | Plans to promote             | Page10 Line27 |
| 25 |             |     | participant retention and    |               |
| 26 |             |     | complete follow-up,          |               |
| 27 |             |     | including list of any        |               |
| 28 |             |     | outcome data to be           |               |
| 29 |             |     | collected for participants   |               |
| 30 |             |     | who discontinue or deviate   |               |
| 31 |             |     | from intervention protocols  |               |
| 32 |             |     |                              |               |
| 33 |             |     |                              |               |
| 34 | Data        | 19  | Plans for data entry,        | Page10 Line24 |
| 35 | management  |     | coding, security, and        |               |
| 36 |             |     | storage, including any       |               |
| 37 |             |     | related processes to         |               |
| 38 |             |     | promote data quality (eg,    |               |
| 39 |             |     | double data entry; range     |               |
| 40 |             |     | checks for data values).     |               |
| 41 |             |     | Reference to where details   |               |
| 42 |             |     | of data management           |               |
| 43 |             |     | procedures can be found, if  |               |
| 44 |             |     | not in the protocol          |               |
| 45 |             |     |                              |               |
| 46 |             |     |                              |               |
| 47 |             |     |                              |               |
| 48 |             |     |                              |               |
| 49 | Statistical | 20a | Statistical methods for      | Page11 Line2  |
| 50 | methods     |     | analysing primary and        |               |
| 51 |             |     | secondary outcomes.          |               |
| 52 |             |     | Reference to where other     |               |
| 53 |             |     | details of the statistical   |               |
| 54 |             |     | analysis plan can be found,  |               |
| 55 |             |     | if not in the protocol       |               |
| 56 |             |     |                              |               |
| 57 |             |     |                              |               |
| 58 |             |     |                              |               |
| 59 |             |     |                              |               |
| 60 |             |     |                              |               |

1  
2  
3  
4  
5  
6  
7  
8  
9  
10  
11  
12  
13  
14  
15  
16  
17  
18  
19  
20  
21  
22  
23  
24  
25  
26  
27  
28  
29  
30  
31  
32  
33  
34  
35  
36  
37  
38  
39  
40  
41  
42  
43  
44  
45  
46  
47  
48  
49  
50  
51  
52  
53  
54  
55  
56  
57  
58  
59  
60

20b Methods for any additional analyses (eg, subgroup and adjusted analyses) Page9 Line3

20c Definition of analysis population relating to protocol non-adherence (eg, as randomised analysis), and any statistical methods to handle missing data (eg, multiple imputation) n/a Considering the purpose of this study, the data of subjects with complete efficacy data before and after treatment will be included in the statistical analysis.

**Methods: Monitoring**

Data monitoring 21a Composition of data monitoring committee (DMC); summary of its role and reporting structure; statement of whether it is independent from the sponsor and competing interests; and reference to where further details about its charter can be found, if not in the protocol. Alternatively, an explanation of why a DMC is not needed Page12 Line17

21b Description of any interim analyses and stopping guidelines, including who will have access to these interim results and make the final decision to terminate the trial Page12 Line21

Harms 22 Plans for collecting, assessing, reporting, and managing solicited and spontaneously reported adverse events and other unintended effects of trial interventions or trial conduct Page9 Line20

|    |                                 |     |                                                                                                                                                                                                                                  |                                                                                                                                                 |
|----|---------------------------------|-----|----------------------------------------------------------------------------------------------------------------------------------------------------------------------------------------------------------------------------------|-------------------------------------------------------------------------------------------------------------------------------------------------|
| 1  |                                 |     |                                                                                                                                                                                                                                  |                                                                                                                                                 |
| 2  | Auditing                        | 23  | Frequency and procedures for auditing trial conduct, if any, and whether the process will be independent from investigators and the sponsor                                                                                      | n/a This clinical trial will not include auditing.                                                                                              |
| 3  |                                 |     |                                                                                                                                                                                                                                  |                                                                                                                                                 |
| 4  |                                 |     |                                                                                                                                                                                                                                  |                                                                                                                                                 |
| 5  |                                 |     |                                                                                                                                                                                                                                  |                                                                                                                                                 |
| 6  |                                 |     |                                                                                                                                                                                                                                  |                                                                                                                                                 |
| 7  |                                 |     |                                                                                                                                                                                                                                  |                                                                                                                                                 |
| 8  |                                 |     |                                                                                                                                                                                                                                  |                                                                                                                                                 |
| 9  |                                 |     |                                                                                                                                                                                                                                  |                                                                                                                                                 |
| 10 | <b>Ethics and dissemination</b> |     |                                                                                                                                                                                                                                  |                                                                                                                                                 |
| 11 |                                 |     |                                                                                                                                                                                                                                  |                                                                                                                                                 |
| 12 | Research ethics approval        | 24  | Plans for seeking research ethics committee/institutional review board (REC/IRB) approval                                                                                                                                        | Page15 Line9                                                                                                                                    |
| 13 |                                 |     |                                                                                                                                                                                                                                  |                                                                                                                                                 |
| 14 |                                 |     |                                                                                                                                                                                                                                  |                                                                                                                                                 |
| 15 |                                 |     |                                                                                                                                                                                                                                  |                                                                                                                                                 |
| 16 |                                 |     |                                                                                                                                                                                                                                  |                                                                                                                                                 |
| 17 |                                 |     |                                                                                                                                                                                                                                  |                                                                                                                                                 |
| 18 |                                 |     |                                                                                                                                                                                                                                  |                                                                                                                                                 |
| 19 | Protocol amendments             | 25  | Plans for communicating important protocol modifications (eg, changes to eligibility criteria, outcomes, analyses) to relevant parties (eg, investigators, REC/IRBs, trial participants, trial registries, journals, regulators) | n/a The preliminary experiments of this research group and the similar types of research by others have proved the feasibility of the research. |
| 20 |                                 |     |                                                                                                                                                                                                                                  |                                                                                                                                                 |
| 21 |                                 |     |                                                                                                                                                                                                                                  |                                                                                                                                                 |
| 22 |                                 |     |                                                                                                                                                                                                                                  |                                                                                                                                                 |
| 23 |                                 |     |                                                                                                                                                                                                                                  |                                                                                                                                                 |
| 24 |                                 |     |                                                                                                                                                                                                                                  |                                                                                                                                                 |
| 25 |                                 |     |                                                                                                                                                                                                                                  |                                                                                                                                                 |
| 26 |                                 |     |                                                                                                                                                                                                                                  |                                                                                                                                                 |
| 27 |                                 |     |                                                                                                                                                                                                                                  |                                                                                                                                                 |
| 28 |                                 |     |                                                                                                                                                                                                                                  |                                                                                                                                                 |
| 29 |                                 |     |                                                                                                                                                                                                                                  |                                                                                                                                                 |
| 30 |                                 |     |                                                                                                                                                                                                                                  |                                                                                                                                                 |
| 31 |                                 |     |                                                                                                                                                                                                                                  |                                                                                                                                                 |
| 32 | Consent or assent               | 26a | Who will obtain informed consent or assent from potential trial participants or authorised surrogates, and how (see Item 32)                                                                                                     | Page6 Line12                                                                                                                                    |
| 33 |                                 |     |                                                                                                                                                                                                                                  |                                                                                                                                                 |
| 34 |                                 |     |                                                                                                                                                                                                                                  |                                                                                                                                                 |
| 35 |                                 |     |                                                                                                                                                                                                                                  |                                                                                                                                                 |
| 36 |                                 |     |                                                                                                                                                                                                                                  |                                                                                                                                                 |
| 37 |                                 |     |                                                                                                                                                                                                                                  |                                                                                                                                                 |
| 38 |                                 |     |                                                                                                                                                                                                                                  |                                                                                                                                                 |
| 39 |                                 | 26b | Additional consent provisions for collection and use of participant data and biological specimens in ancillary studies, if applicable                                                                                            | n/a This experiment does not involve biological specimens.                                                                                      |
| 40 |                                 |     |                                                                                                                                                                                                                                  |                                                                                                                                                 |
| 41 |                                 |     |                                                                                                                                                                                                                                  |                                                                                                                                                 |
| 42 |                                 |     |                                                                                                                                                                                                                                  |                                                                                                                                                 |
| 43 |                                 |     |                                                                                                                                                                                                                                  |                                                                                                                                                 |
| 44 |                                 |     |                                                                                                                                                                                                                                  |                                                                                                                                                 |
| 45 |                                 |     |                                                                                                                                                                                                                                  |                                                                                                                                                 |
| 46 |                                 |     |                                                                                                                                                                                                                                  |                                                                                                                                                 |
| 47 | Confidentiality                 | 27  | How personal information about potential and enrolled participants will be collected, shared, and maintained in order to protect confidentiality before, during, and after the trial                                             | Page14 Line26                                                                                                                                   |
| 48 |                                 |     |                                                                                                                                                                                                                                  |                                                                                                                                                 |
| 49 |                                 |     |                                                                                                                                                                                                                                  |                                                                                                                                                 |
| 50 |                                 |     |                                                                                                                                                                                                                                  |                                                                                                                                                 |
| 51 |                                 |     |                                                                                                                                                                                                                                  |                                                                                                                                                 |
| 52 |                                 |     |                                                                                                                                                                                                                                  |                                                                                                                                                 |
| 53 |                                 |     |                                                                                                                                                                                                                                  |                                                                                                                                                 |
| 54 |                                 |     |                                                                                                                                                                                                                                  |                                                                                                                                                 |
| 55 |                                 |     |                                                                                                                                                                                                                                  |                                                                                                                                                 |
| 56 |                                 |     |                                                                                                                                                                                                                                  |                                                                                                                                                 |
| 57 |                                 |     |                                                                                                                                                                                                                                  |                                                                                                                                                 |
| 58 |                                 |     |                                                                                                                                                                                                                                  |                                                                                                                                                 |
| 59 |                                 |     |                                                                                                                                                                                                                                  |                                                                                                                                                 |
| 60 |                                 |     |                                                                                                                                                                                                                                  |                                                                                                                                                 |

|    |                   |     |                                |               |
|----|-------------------|-----|--------------------------------|---------------|
| 1  |                   |     |                                |               |
| 2  | Declaration of    | 28  | Financial and other            | Page16 Line26 |
| 3  | interests         |     | competing interests for        |               |
| 4  |                   |     | principal investigators for    |               |
| 5  |                   |     | the overall trial and each     |               |
| 6  |                   |     | study site                     |               |
| 7  |                   |     |                                |               |
| 8  |                   |     |                                |               |
| 9  | Access to         | 29  | Statement of who will have     | Page15 Line1  |
| 10 | data              |     | access to the final trial      |               |
| 11 |                   |     | dataset, and disclosure of     |               |
| 12 |                   |     | contractual agreements that    |               |
| 13 |                   |     | limit such access for          |               |
| 14 |                   |     | investigators                  |               |
| 15 |                   |     |                                |               |
| 16 |                   |     |                                |               |
| 17 | Ancillary and     | 30  | Provisions, if any, for        | Page9 Line20  |
| 18 | post-trial care   |     | ancillary and post-trial care, |               |
| 19 |                   |     | and for compensation to        |               |
| 20 |                   |     | those who suffer harm from     |               |
| 21 |                   |     | trial participation            |               |
| 22 |                   |     |                                |               |
| 23 |                   |     |                                |               |
| 24 | Dissemination     | 31a | Plans for investigators and    | Page16 Line33 |
| 25 | policy            |     | sponsor to communicate         |               |
| 26 |                   |     | trial results to participants, |               |
| 27 |                   |     | healthcare professionals,      |               |
| 28 |                   |     | the public, and other          |               |
| 29 |                   |     | relevant groups (eg, via       |               |
| 30 |                   |     | publication, reporting in      |               |
| 31 |                   |     | results databases, or other    |               |
| 32 |                   |     | data sharing                   |               |
| 33 |                   |     | arrangements), including       |               |
| 34 |                   |     | any publication restrictions   |               |
| 35 |                   |     |                                |               |
| 36 |                   |     |                                |               |
| 37 |                   |     |                                |               |
| 38 |                   | 31b | Authorship eligibility         | Page16 Line35 |
| 39 |                   |     | guidelines and any             |               |
| 40 |                   |     | intended use of                |               |
| 41 |                   |     | professional writers           |               |
| 42 |                   |     |                                |               |
| 43 |                   |     |                                |               |
| 44 |                   | 31c | Plans, if any, for granting    | Page16 Line33 |
| 45 |                   |     | public access to the full      |               |
| 46 |                   |     | protocol, participant-level    |               |
| 47 |                   |     | dataset, and statistical code  |               |
| 48 |                   |     |                                |               |
| 49 |                   |     |                                |               |
| 50 | <b>Appendices</b> |     |                                |               |
| 51 |                   |     |                                |               |
| 52 | Informed          | 32  | Model consent form and         | See           |
| 53 | consent           |     | other related                  | supplement    |
| 54 | materials         |     | documentation given to         | material      |
| 55 |                   |     | participants and authorised    |               |
| 56 |                   |     | surrogates                     |               |
| 57 |                   |     |                                |               |
| 58 |                   |     |                                |               |
| 59 |                   |     |                                |               |
| 60 |                   |     |                                |               |

|    |            |    |                              |                          |
|----|------------|----|------------------------------|--------------------------|
| 1  |            |    |                              |                          |
| 2  | Biological | 33 | Plans for collection,        | n/a This experiment does |
| 3  | specimens  |    | laboratory evaluation, and   | not involve biological   |
| 4  |            |    | storage of biological        | specimens.               |
| 5  |            |    | specimens for genetic or     |                          |
| 6  |            |    | molecular analysis in the    |                          |
| 7  |            |    | current trial and for future |                          |
| 8  |            |    | use in ancillary studies, if |                          |
| 9  |            |    | applicable                   |                          |
| 10 |            |    |                              |                          |
| 11 |            |    |                              |                          |

---

12 \*It is strongly recommended that this checklist be read in conjunction with the SPIRIT 2013  
13 Explanation & Elaboration for important clarification on the items. Amendments to the  
14 protocol should be tracked and dated. The SPIRIT checklist is copyrighted by the SPIRIT  
15 Group under the Creative Commons "[Attribution-NonCommercial-NoDerivs 3.0 Unported](#)"  
16 license.  
17  
18  
19  
20  
21  
22  
23  
24  
25  
26  
27  
28  
29  
30  
31  
32  
33  
34  
35  
36  
37  
38  
39  
40  
41  
42  
43  
44  
45  
46  
47  
48  
49  
50  
51  
52  
53  
54  
55  
56  
57  
58  
59  
60
